1 Genetic Association Study of Childhood Aggression across raters,  
2 instruments and age

3

4 Authors & Addresses:

5 Ip, Hill F.<sup>1</sup>, van der Laan, Camiel M.<sup>1,2</sup>, Krapohl, Eva M. L.<sup>3</sup>, Brikell, Isabell<sup>4</sup>, Sánchez-Mora,  
6 Cristina<sup>5,6,7</sup>, Nolte, Ilja M.<sup>8</sup>, St Pourcain, Beate<sup>9,10,11</sup>, Bolhuis, Koen<sup>12</sup>, Palviainen, Teemu<sup>13</sup>,  
7 Zafarmand, Hadi<sup>14,15</sup>, Colodro-Conde, Lucía<sup>16</sup>, Gordon, Scott<sup>16</sup>, Zayats, Tetyana<sup>17,18,19</sup>, Aliev,  
8 Fazil<sup>20,21</sup>, Jiang, Chang<sup>22,23</sup>, Wang, Carol A.<sup>24</sup>, Saunders, Gretchen<sup>25</sup>, Karhunen, Ville<sup>26</sup>,  
9 Hammerschlag, Anke R.<sup>27,1,28</sup>, Adkins, Daniel E.<sup>29,30</sup>, Border, Richard<sup>31,32,33</sup>, Peterson, Roseann E.<sup>34</sup>,  
10 Prinz, Joseph A.<sup>35</sup>, Thiering, Elisabeth<sup>36,37</sup>, Seppälä, Ilkka<sup>38</sup>, Vilor-Tejedor, Natàlia<sup>39-43</sup>, Ahluwalia,  
11 Tarunveer S.<sup>44,45</sup>, Day, Felix R.<sup>46</sup>, Hottenga, Jouke-Jan<sup>1</sup>, Allegrini, Andrea G.<sup>3</sup>, Rimfeld, Kaili<sup>3</sup>, Chen,  
12 Qi<sup>4</sup>, Lu, Yi<sup>4</sup>, Martin, Joanna<sup>4,47</sup>, Soler Artigas, María<sup>5,6,7</sup>, Rovira, Paula<sup>5,6,7</sup>, Bosch, Rosa<sup>5,6,48</sup>, Español,  
13 Gemma<sup>5</sup>, Ramos Quiroga, Josep Antoni<sup>5,6,7,48</sup>, Neumann, Alexander<sup>12,49</sup>, Ensink, Judith<sup>50,51</sup>, Grasby,  
14 Katrina<sup>16</sup>, Morosoli, José J.<sup>16</sup>, Tong, Xiaoran<sup>22,23</sup>, Marrington, Shelby<sup>52</sup>, Middeldorp, Christel<sup>27,1,53</sup>,  
15 Scott, James G.<sup>52,54,55</sup>, Vinkhuyzen, Anna<sup>56</sup>, Shabalin, Andrey A.<sup>30</sup>, Corley, Robin<sup>31,57</sup>, Evans, Luke  
16 M.<sup>31,57</sup>, Sugden, Karen<sup>58,35</sup>, Alemany, Silvia<sup>39,40,41</sup>, Sass, Lærke<sup>44</sup>, Vinding, Rebecca<sup>44</sup>, Ruth, Kate<sup>59</sup>,  
17 Tyrrell, Jess<sup>59</sup>, Davies, Gareth E.<sup>60</sup>, Ehli, Erik A.<sup>60</sup>, Hagenbeek, Fiona A.<sup>1</sup>, De Zeeuw, Eveline<sup>1</sup>, Van  
18 Beijsterveldt, Toos C.E.M.<sup>1</sup>, Larsson, Henrik<sup>4,61</sup>, Snieder, Harold<sup>8</sup>, Verhulst, Frank C.<sup>12,62</sup>, Amin,  
19 Najaf<sup>63</sup>, Whipp, Alyce M.<sup>13</sup>, Korhonen, Tellervo<sup>13</sup>, Vuoksimaa, Eero<sup>13</sup>, Rose, Richard J.<sup>64</sup>,  
20 Uitterlinden, André G.<sup>63,65,66</sup>, Heath, Andrew C.<sup>67</sup>, Madden, Pamela<sup>67</sup>, Haavik, Jan<sup>17,68</sup>, Harris,  
21 Jennifer R.<sup>69</sup>, Helgeland, Øyvind<sup>70</sup>, Johansson, Stefan<sup>17,71</sup>, Knudsen, Gun Peggy S.<sup>69</sup>, Njolstad, Pal  
22 Rasmus<sup>72</sup>, Lu, Qing<sup>22,23</sup>, Rodriguez, Alina<sup>26,73</sup>, Henders, Anjali K.<sup>56</sup>, Mamun, Abdullah<sup>74</sup>, Najman,  
23 Jakob M.<sup>52</sup>, Brown, Sandy<sup>75</sup>, Hopfer, Christian<sup>76</sup>, Krauter, Kenneth<sup>77</sup>, Reynolds, Chandra<sup>78</sup>, Smolen,  
24 Andrew<sup>31</sup>, Stallings, Michael<sup>31,32</sup>, Wadsworth, Sally<sup>31</sup>, Wall, Tamara L.<sup>75</sup>, Silberg, Judy L.<sup>79,34</sup>, Miller,  
25 Allison<sup>80</sup>, Keltikangas-Järvinen, Liisa<sup>81</sup>, Hakulinen, Christian<sup>81</sup>, Pulkki-Råback, Laura<sup>81</sup>, Havdahl,  
26 Alexandra<sup>82,83</sup>, Magnus, Per<sup>84</sup>, Raitakari, Olli T.<sup>85,86,87</sup>, Perry, John R.B.<sup>46</sup>, Llop, Sabrina<sup>88,89</sup>, Lopez-  
27 Espinosa, Maria-Jose<sup>88,89,90</sup>, Bønnelykke, Klaus<sup>44</sup>, Bisgaard, Hans<sup>44</sup>, Sunyer, Jordi<sup>39,40,41,91</sup>, Lehtimäki,  
28 Terho<sup>38</sup>, Arseneault, Louise<sup>92</sup>, Standl, Marie<sup>36</sup>, Heinrich, Joachim<sup>36,93,94</sup>, Boden, Joseph<sup>95</sup>, Pearson,  
29 John<sup>96</sup>, Horwood, L John<sup>95</sup>, Kennedy, Martin<sup>97</sup>, Poulton, Richie<sup>98</sup>, Eaves, Lindon J.<sup>79,34</sup>, Maes,  
30 Hermine H.<sup>79,34,99</sup>, Hewitt, John<sup>31,32</sup>, Copeland, William E.<sup>100</sup>, Costello, Elizabeth J.<sup>101</sup>, Williams, Gail  
31 M.<sup>52</sup>, Wray, Naomi<sup>56,102</sup>, Järvelin, Marjo-Riitta<sup>26,103</sup>, McGue, Matt<sup>25</sup>, Iacono, William<sup>25</sup>, Caspi,  
32 Avshalom<sup>58,92,104,35</sup>, Moffitt, Terrie E.<sup>58,92,104,35</sup>, Whitehouse, Andrew<sup>105</sup>, Pennell, Craig E.<sup>24</sup>, Klump,  
33 Kelly L.<sup>106</sup>, Burt, S. Alexandra<sup>106</sup>, Dick, Danielle M.<sup>20,107,108</sup>, Reichborn-Kjennerud, Ted<sup>83,109</sup>, Martin,  
34 Nicholas G.<sup>16</sup>, Medland, Sarah E.<sup>16</sup>, Vrijkkotte, Tanja<sup>14</sup>, Kaprio, Jaakko<sup>110,13</sup>, Tiemeier, Henning<sup>12,111</sup>,  
35 Davey Smith, George<sup>9,112</sup>, Hartman, Catharina A.<sup>113</sup>, Oldehinkel, Albertine J.<sup>113</sup>, Casas, Miquel<sup>5,6,7,48</sup>,  
36 Ribasés, Marta<sup>5,6,7</sup>, Lichtenstein, Paul<sup>4</sup>, Lundström, Sebastian<sup>114,115</sup>, Plomin, Robert<sup>3</sup>, Bartels,  
37 Meike<sup>1,28,\*</sup>, Nivard, Michel G.<sup>1,\*</sup>, Boomsma, Dorret I.<sup>1,28,\*</sup>

38

39

40

41

- 42 <sup>1</sup> Department of Biological Psychology, Vrije Universiteit Amsterdam, Amsterdam, The Netherlands  
43 <sup>2</sup> Netherlands Institute for the Study of Crime and Law Enforcement  
44 <sup>3</sup> Institute of Psychiatry, Psychology and Neuroscience, King's College London, United Kingdom  
45 <sup>4</sup> Department of Medical Epidemiology and Biostatistics, Karolinska Institutet, Stockholm, Sweden  
46 <sup>5</sup> Department of Psychiatry, Hospital Universitari Vall d'Hebron, Barcelona, Spain  
47 <sup>6</sup> Biomedical Network Research Centre on Mental Health (CIBERSAM), Instituto de Salud Carlos III,  
48 Barcelona, Spain  
49 <sup>7</sup> Psychiatric Genetics Unit, Group of Psychiatry, Mental Health and Addiction, Vall d'Hebron  
50 Research Institute (VHIR), Universitat Autònoma de Barcelona, Barcelona, Spain  
51 <sup>8</sup> Department of Epidemiology, University of Groningen, University Medical Center Groningen,  
52 Groningen, The Netherlands  
53 <sup>9</sup> MRC Integrative Epidemiology Unit, University of Bristol, Bristol, UK  
54 <sup>10</sup> Max Planck Institute for Psycholinguistics, The Netherlands  
55 <sup>11</sup> Donders Institute for Brain, Cognition and Behaviour, Radboud University, The Netherlands  
56 <sup>12</sup> Department of Child and Adolescent Psychiatry/Psychology, Erasmus University Medical Center,  
57 Rotterdam, Netherlands  
58 <sup>13</sup> Institute for Molecular Medicine FIMM, HiLife, University of Helsinki, Helsinki, Finland  
59 <sup>14</sup> Department of Public Health, Amsterdam Public Health Research Institute, Amsterdam UMC,  
60 location Academic Medical Center, University of Amsterdam, Amsterdam, The Netherlands  
61 <sup>15</sup> Department of Clinical Epidemiology, Biostatistics and Bioinformatics, Amsterdam Public Health  
62 Research Institute, Amsterdam UMC, location Academic Medical Center, University of Amsterdam,  
63 Amsterdam, The Netherlands  
64 <sup>16</sup> QIMR Berghofer Medical Research Institute, Brisbane, Australia  
65 <sup>17</sup> Department of Biomedicine, University of Bergen, Norway  
66 <sup>18</sup> Analytic and Translational Genetics Unit, Department of Medicine, Massachusetts General  
67 Hospital and Harvard Medical School, Boston, Massachusetts, USA  
68 <sup>19</sup> Stanley Center for Psychiatric Research, Broad Institute of MIT and Harvard, Cambridge,  
69 Massachusetts, USA  
70 <sup>20</sup> Department of Psychology, Virginia Commonwealth University, USA  
71 <sup>21</sup> Faculty of Business, Karabuk University, Turkey  
72 <sup>22</sup> Department of Epidemiology and Biostatistics, Michigan State University, East Lansing, USA  
73 <sup>23</sup> Department of Biostatistics, University of Florida, Gainesville, USA  
74 <sup>24</sup> School of Medicine and Public Health, Faculty of Medicine and Health, The University of Newcastle  
75 <sup>25</sup> Department of Psychology, University of Minnesota, USA  
76 <sup>26</sup> Department of Epidemiology and Biostatistics, MRC-PHE Centre for Environment and Health,  
77 School of Public Health, Imperial College London, London, W2 1PG, United Kingdom  
78 <sup>27</sup> Child Health Research Centre, the University of Queensland, Brisbane, QLD, Australia  
79 <sup>28</sup> Amsterdam Public Health Research Institute, Amsterdam, The Netherlands  
80 <sup>29</sup> Department of Sociology, College of Social and Behavioral Science, University of Utah  
81 <sup>30</sup> Department of Psychiatry, School of Medicine, University of Utah  
82 <sup>31</sup> Institute for Behavioral Genetics, University of Colorado Boulder, Colorado, USA  
83 <sup>32</sup> Department of Psychology and Neuroscience, University of Colorado Boulder, Colorado, USA  
84 <sup>33</sup> Department of Applied Mathematics, University of Colorado Boulder, Colorado, USA  
85 <sup>34</sup> Department of Psychiatry, Virginia Institute for Psychiatric and Behavioral Genetics, Virginia  
86 Commonwealth University

- 87 <sup>35</sup> Center for Genomic and Computational Biology, Duke University, Durham, NC, USA
- 88 <sup>36</sup> Institute of Epidemiology, Helmholtz Zentrum München - German Research Center for  
89 Environmental Health, Neuherberg, Germany
- 90 <sup>37</sup> Ludwig-Maximilians-University of Munich, Dr. von Hauner Children's Hospital, Division of  
91 Metabolic Diseases and Nutritional Medicine, Munich, Germany
- 92 <sup>38</sup> Department of Clinical Chemistry, Fimlab Laboratories, and Finnish Cardiovascular Research  
93 Center - Tampere, Faculty of Medicine and Health Technology, Tampere University, Tampere 33520,  
94 Finland
- 95 <sup>39</sup> ISGlobal, Barcelona Institute for Global Health, Barcelona, Spain
- 96 <sup>40</sup> Universitat Pompeu Fabra (UPF), Barcelona, Spain
- 97 <sup>41</sup> CIBER Epidemiología y Salud Pública (CIBERESP), Spain
- 98 <sup>42</sup> Centre for Genomic Regulation (CRG), The Barcelona Institute of Science and Technology,  
99 Barcelona, Spain
- 100 <sup>43</sup> Barcelona Beta Brain Research Center, Pasqual Maragall Foundation (FPM), Barcelona, Spain
- 101 <sup>44</sup> COPSAC, Copenhagen Prospective Studies on Asthma in Childhood, Herlev and Gentofte Hospital,  
102 University of Copenhagen, Copenhagen, Denmark
- 103 <sup>45</sup> Steno Diabetes Center Copenhagen, Gentofte, Denmark
- 104 <sup>46</sup> MRC Epidemiology Unit, University of Cambridge School of Clinical Medicine, Institute of  
105 Metabolic Science, Cambridge Biomedical Campus, Cambridge, UK
- 106 <sup>47</sup> MRC Centre for Neuropsychiatric Genetics and Genomics, Division of Psychological Medicine and  
107 Clinical Neurosciences, Cardiff University, Cardiff, UK
- 108 <sup>48</sup> Department of Psychiatry and Legal Medicine, Universitat Autònoma de Barcelona, Barcelona,  
109 Spain
- 110 <sup>49</sup> Lady Davis Institute for Medical Research, Jewish General Hospital, Montreal, Qc, Canada
- 111 <sup>50</sup> Department of Child and Adolescent Psychiatry, Academic Medical Center, Amsterdam, The  
112 Netherlands
- 113 <sup>51</sup> De Bascule, Academic centre for Child and Adolescent Psychiatry, Amsterdam, The Netherlands
- 114 <sup>52</sup> School of Public Health, Faculty of Medicine, The University of Queensland, Herston 4006,  
115 Australia
- 116 <sup>53</sup> Children's Health Queensland Hospital and Health Service, Child and Youth Mental Health Service,  
117 Brisbane, QLD, Australia
- 118 <sup>54</sup> Metro North Mental Health, University of Queensland, QLD, Australia
- 119 <sup>55</sup> Queensland Centre for Mental Health Research, QLD, Australia
- 120 <sup>56</sup> Institute for Molecular Bioscience, University of Queensland, QLD, Australia
- 121 <sup>57</sup> Department of Ecology and Evolutionary Biology, University of Colorado Boulder, Colorado, USA
- 122 <sup>58</sup> Department of Psychology and Neuroscience and Center for Genomic and Computational Biology,  
123 Duke University, Durham, NC, USA
- 124 <sup>59</sup> Genetics of Complex Traits, University of Exeter Medical School, Royal Devon & Exeter Hospital,  
125 Exeter, EX2 5DW, UK
- 126 <sup>60</sup> Avera Institute for Human Genetics, Sioux Falls, South Dakota, USA
- 127 <sup>61</sup> School of Medical Sciences, Örebro University, Örebro, Sweden
- 128 <sup>62</sup> Child and Adolescent Mental Health Centre, Mental Health Services Capital Region, Research Unit,  
129 Copenhagen University Hospital, Copenhagen, Denmark
- 130 <sup>63</sup> Department of Epidemiology, Erasmus University Medical Center, Rotterdam, The Netherlands
- 131 <sup>64</sup> Department of Psychological and Brain Sciences, Indiana University, Bloomington, IN, USA

132 <sup>65</sup> Department of Internal Medicine, Erasmus University Medical Center, Rotterdam, The  
133 Netherlands  
134 <sup>66</sup> Netherlands Genomics Initiative (NGI)-sponsored Netherlands Consortium for Healthy Aging  
135 (NCHA), Leiden, The Netherlands  
136 <sup>67</sup> Washington University, St Louis MO, USA  
137 <sup>68</sup> Division of Psychiatry, Haukeland University Hospital, Norway  
138 <sup>69</sup> Division of Health Data and Digitalisation, The Norwegian Institute of Public Health, Oslo, Norway  
139 <sup>70</sup> Department of Genetics and Bioinformatics, Division of Health Data and Digitalization, The  
140 Norwegian Institute of Public Health  
141 <sup>71</sup> K.G. Jebsen Centre for Neuropsychiatric Disorders, Department of Clinical Science, University of  
142 Bergen, Norway  
143 <sup>72</sup> Department of Clinical Science, University of Bergen, Norway  
144 <sup>73</sup> School of Psychology, University of Lincoln, Lincolnshire, LN5 7AY, United Kingdom  
145 <sup>74</sup> Institute for Social Science Research, University of Queensland, Long Pocket 4068, Australia  
146 <sup>75</sup> Department of Psychiatry, University of California, San Diego  
147 <sup>76</sup> University of Colorado School of Medicine, Aurora, Colorado, USA  
148 <sup>77</sup> Department of Molecular, Cellular, and Developmental Biology, University of Colorado Boulder,  
149 USA  
150 <sup>78</sup> Department of Psychology, University of California Riverside, Riverside, CA, USA  
151 <sup>79</sup> Department of Human & Molecular Genetics, Virginia Institute for Psychiatric and Behavioral  
152 Genetics, Virginia Commonwealth University  
153 <sup>80</sup> Department of Pathology and Biomedical Science, and Carney Centre for Pharmacogenomics,  
154 University of Otago Christchurch, New Zealand  
155 <sup>81</sup> Department of Psychology and Logopedics, Faculty of Medicine, University of Helsinki, Finland  
156 <sup>82</sup> Nic Waals Institute, Lovisenberg Diaconal Hospital, Oslo, Norway  
157 <sup>83</sup> Department of Mental Disorders, Norwegian Institute of Public Health, Oslo, Norway  
158 <sup>84</sup> Centre for Fertility and Health, Norwegian Institute of Public Health, Oslo, Norway  
159 <sup>85</sup> Centre for Population Health Research, University of Turku and Turku University Hospital  
160 <sup>86</sup> Research Centre of Applied and Preventive Cardiovascular Medicine, University of Turku  
161 <sup>87</sup> Department of Clinical Physiology and Nuclear Medicine, Turku University Hospital, Turku, Finland  
162 <sup>88</sup> Epidemiology and Environmental Health Joint Research Unit, FISABIO-Universitat Jaume I-  
163 Universitat de València, Valencia, Spain  
164 <sup>89</sup> Spanish Consortium for Research on Epidemiology and Public Health (CIBERESP), Madrid, Spain  
165 <sup>90</sup> Faculty of Nursing and Chiropody, Universitat de València, Valencia, Spain  
166 <sup>91</sup> IMIM (Hospital del Mar Medical Research Institute), Barcelona, Spain  
167 <sup>92</sup> Department of Psychiatry and Behavioral Sciences, Duke University School of Medicine, Durham,  
168 NC, USA  
169 <sup>93</sup> Institute and Outpatient Clinic for Occupational, Social and Environmental Medicine, University of  
170 Munich Medical Center, Ludwig-Maximilians-Universität München, Munich, Germany  
171 <sup>94</sup> Allergy and Lung Health Unit, Melbourne School of Population and Global Health, University of  
172 Melbourne, Melbourne, Australia  
173 <sup>95</sup> Christchurch Health and Development Study, Department of Psychological Medicine, University of  
174 Otago Christchurch, New Zealand  
175 <sup>96</sup> Biostatistics and Computational Biology Unit, Department of Pathology and Biomedical Science,  
176 University of Otago Christchurch, New Zealand

177 <sup>97</sup> Department of Pathology and Biomedical Science, and Carney Centre for Pharmacogenomics,  
178 University of Otago Christchurch, New Zealand  
179 <sup>98</sup> Dunedin Multidisciplinary Health and Development Research Unit, University of Otago, Dunedin,  
180 New Zealand  
181 <sup>99</sup> Massey Cancer Center, Virginia Commonwealth University  
182 <sup>100</sup> Department of Psychiatry, College of Medicine, University of Vermont  
183 <sup>101</sup> Department of Psychiatry, School of Medicine, Duke University  
184 <sup>102</sup> Queensland Brain Institute, Institute for Molecular Bioscience, University of Queensland, St Lucia  
185 4072, Australia  
186 <sup>103</sup> Center for Life Course Health Research, Faculty of Medicine, University of Oulu, PO Box 8000, FI-  
187 90014 Oulun yliopisto, Finland  
188 <sup>104</sup> Social, Genetic, and Developmental Psychiatry Research Centre, Institute of Psychiatry,  
189 Psychology, and Neuroscience, King's College London, UK  
190 <sup>105</sup> Telethon Kids Institute, The University of Western Australia, Perth, Western Australia, Australia  
191 <sup>106</sup> Department of Psychology, Michigan State University, East Lansing, USA  
192 <sup>107</sup> Department of Human and Molecular Genetics, Virginia Commonwealth University, Richmond,  
193 VA, USA  
194 <sup>108</sup> College Behavioral and Emotional Health Institute, Virginia Commonwealth University, Richmond,  
195 VA, USA  
196 <sup>109</sup> Institute of Clinical Medicine, University of Oslo, Oslo, Norway  
197 <sup>110</sup> Department of Public Health, Medical Faculty, University of Helsinki, Helsinki, Finland  
198 <sup>111</sup> Department of Social and Behavioral Science, Harvard TH Chan School of Public Health, Boston,  
199 USA  
200 <sup>112</sup> Population Health Sciences, Bristol Medical School, University of Bristol, Bristol, UK  
201 <sup>113</sup> Department of Psychiatry, University of Groningen, University Medical Center Groningen,  
202 Groningen, The Netherlands  
203 <sup>114</sup> Gillberg Neuropsychiatry Centre, University of Gothenburg, Gothenburg, Sweden  
204 <sup>115</sup> Sweden Centre for Ethics, Law and Mental Health, University of Gothenburg, Gothenburg,  
205 Sweden  
206 \* These authors jointly supervised this work  
207

208 Corresponding authors: M Bartels ([m.bartels@vu.nl](mailto:m.bartels@vu.nl)), MG Nivard ([m.g.nivard@vu.nl](mailto:m.g.nivard@vu.nl)), DI Boomsma  
209 ([di.boomsma@vu.nl](mailto:di.boomsma@vu.nl))

210

211

212 **Abstract**

213 Childhood aggressive behavior (AGG) has a substantial heritability of around 50%. Here we present a  
214 genome-wide association meta-analysis (GWAMA) of childhood AGG, in which all phenotype  
215 measures across childhood ages from multiple assessors were included. We analyzed phenotype  
216 assessments for a total of 328 935 observations from 87 485 children aged between 1.5 and 18 years,  
217 while accounting for sample overlap. We also meta-analyzed within subsets of the data – i.e. within  
218 rater, instrument and age. SNP-heritability for the overall meta-analysis ( $AGG_{overall}$ ) was 3.31%  
219 ( $SE=0.0038$ ). We found no genome-wide significant SNPs for  $AGG_{overall}$ . The gene-based analysis  
220 returned three significant genes: *ST3GAL3* ( $P=1.6E-06$ ), *PCDH7* ( $P=2.0E-06$ ) and *IPO13* ( $P=2.5E-06$ ).  
221 All three genes have previously been associated with educational traits. Polygenic scores based on  
222 our GWAMA significantly predicted aggression in a holdout sample of children (variance explained =  
223 0.44%) and in retrospectively assessed childhood aggression (variance explained = 0.20%). Genetic  
224 correlations ( $r_g$ ) among rater-specific assessment of AGG ranged from  $r_g=0.46$  between self- and  
225 teacher-assessment to  $r_g=0.81$  between mother- and teacher-assessment. We obtained moderate  
226 to strong  $r_g$ 's with selected phenotypes from multiple domains, but hardly with any of the classical  
227 biomarkers thought to be associated with AGG. Significant genetic correlations were observed with  
228 most psychiatric and psychological traits (range  $|r_g|$ : 0.19 – 1.00), except for obsessive-compulsive  
229 disorder. Aggression had a negative genetic correlation ( $r_g \approx -0.5$ ) with cognitive traits and age at  
230 first birth. Aggression was strongly genetically correlated with smoking phenotypes (range  $|r_g|$ :  
231 0.46 – 0.60). The genetic correlations between aggression and psychiatric disorders were weaker for  
232 teacher-reported AGG than for mother- and self-reported AGG. The current GWAMA of childhood  
233 aggression provides a powerful tool to interrogate the rater-specific genetic etiology of AGG.

234

235

## 236 **Introduction**

237 There is a variety of phenotypic definitions of aggressive behavior (AGG), from broadly defined  
238 externalizing problems to narrow definitions like chronic physical aggression<sup>1</sup>. Generally any action  
239 performed with the intention to harm another organism can be viewed as AGG<sup>2,3</sup>. AGG is considered a  
240 common human behavior<sup>4</sup>, with people varying in the degree of AGG they exhibit<sup>5</sup>. Children typically  
241 display AGG early in life, after which symptoms tend to diminish<sup>6,7</sup>, although in some individuals AGG  
242 persists into adulthood<sup>8</sup>. AGG is also part of numerous childhood and adult disorders<sup>9</sup>, including  
243 oppositional defiant disorder (ODD) and conduct disorder (CD)<sup>10</sup>. In its extreme forms, AGG may be  
244 considered a disorder by itself – inflicting a huge personal and financial burden on the individual, their  
245 relatives, friends, and society as a whole<sup>11</sup>. In general population studies, AGG is commonly treated as  
246 a quantitative trait, and pathological AGG has been argued to be best seen as the extreme end of such  
247 a continuum<sup>12–14</sup>. Childhood AGG co-occurs with many other behavioral, emotional, and social  
248 problems<sup>15,16</sup> and is associated with increased risk of developing negative outcomes later in life,  
249 including cannabis abuse<sup>17</sup>, criminal convictions<sup>18</sup>, anxiety disorder<sup>19</sup>, or antisocial personality  
250 disorder<sup>20</sup>. Not all associated outcomes are harmful<sup>21</sup>. For example, children who learn to control  
251 their impulses and apply aggressive acts as a well-timed coercion strategy are generally more liked by  
252 their peers and score higher on social dominance<sup>22</sup>.

253 Despite a heritability of roughly 50%<sup>5,23</sup>, genome-wide association studies (GWASs) on  
254 childhood AGG have not identified genome-wide significant loci that replicated<sup>1</sup>. Childhood cohorts  
255 often have rich longitudinal data and assessments from multiple informants and we aimed to increase  
256 power to detect genomic loci via multivariate genome-wide association meta-analysis (GWAMA)  
257 across genetically correlated traits<sup>24,25</sup>. In AGG, twin studies have reported moderate to high genetic  
258 correlations among instruments, raters, and age [26–29]. Childhood behavior can be context  
259 dependent, with teachers, fathers, and mothers each observing and rating aggression against a  
260 different background. Teachers are typically unrelated to the child, and see the child in the context of  
261 a structured classroom and can judge the child's behavior against that of other pupils. Parents share

262 part of their genome with their offspring and, most often, a household. Parental genomes also  
263 influence the home environment, and it is predominantly within this context that parents observe the  
264 child's behavior. Multiple assessments of aggression by teachers, fathers, and mothers, by different  
265 instruments and at different ages, provides information that may be unique to a specific context and  
266 therefore may capture context-dependent expression of AGG. These considerations support an  
267 approach in which all AGG data are simultaneously analyzed, while retaining the ability to analyze the  
268 data by rater. Our analyses include repeated observations on the same subject, which requires  
269 appropriate modeling of the clustered data, since the covariance between test statistics becomes a  
270 function of a true shared genetic signal and the phenotypic correlation among outcomes<sup>29</sup>. We  
271 developed an approach that allowed inclusion of all measures for a child – e.g. from multiple raters at  
272 multiple ages – and resolved issues of sample overlap at the level of the meta-analysis. By doing so we  
273 make full use of all data and maximize statistical power for gene discovery. At the same time, by  
274 aggregating data at the level of the meta-analysis we retain the flexibility to estimate  $r_g$ 's between  
275 AGG at different ages, by different raters and instruments, and test how AGG assessed by multiple  
276 raters differ in the  $r_g$  with other phenotypes.

277 Data on AGG from parent-, teacher- and self-report in boys and girls were collected in 29  
278 cohorts from Europe, USA, Australia, and New-Zealand with 328 935 observations from 87 485  
279 participants, aged 1.5 to 18 years. First, we combined all data to produce the largest GWAMA on  
280 childhood AGG to date. SNP-based association tests were followed up by gene-based analyses. We  
281 computed polygenic scores (PGSs) to test the out-of-sample prediction of AGG to explore the  
282 usefulness of our GWAMA in future research<sup>30</sup>. To assess genetic pleiotropy between AGG and  
283 associated traits, we estimated  $r_g$ 's with a preselected set of external phenotypes from multiple  
284 domains – with a focus on psychiatric and psychological traits, cognition, anthropometric and  
285 reproductive traits, substance use, and classic biomarkers of AGG, including testosterone levels.  
286 Second, meta-analyses were done by rater, instrument, and age. We estimated  $r_g$ 's across these



287 assessments of AGG. To identify context-specific genetic overlap with the external phenotypes,  $r_g$ 's  
288 were also estimated between rater-specific assessments of AGG and the external phenotypes.

289

## 290 **Methodology**

### 291 **Data description**

292 Extended description of the cohorts and phenotypes is supplied in the Supplemental Text and  
293 Supplementary Tables 1-9. Cohorts with assessment of AGG in genotyped children and adolescents  
294 took part in the meta-analysis. AGG was assessed on continuous scales, with higher scores indicating  
295 higher levels of AGG. Within cohort, samples were stratified by (1) rater, (2) instrument and (3) age,  
296 maintaining at least 450 observations in each stratum. We ran a univariate GWAS for each stratum  
297 within each cohort (Supplementary Table 8). GWASs were run by local analysts following a standard  
298 operation protocol (see URLs) after which the summary statistics were uploaded to a central location  
299 for the meta-analysis. To account for dependence within cohort in the meta-analysis (see  
300 Supplementary Text), each cohort supplied the phenotypic covariance matrix between the AGG  
301 measures (Supplementary Table 10) and the degree of sample overlap (Supplementary Table 11)  
302 between the different strata. Supplementary Figure 1 shows the distribution of phenotypic  
303 correlations across all AGG measures. We assumed no sample overlap across cohorts, and  
304 phenotypic correlations among cohorts were set to zero and omitted from Supplementary Figure 1.  
305 Phenotypic correlations of zero also correspond to independent samples within a cohort. For GWASs  
306 with sample overlap, most phenotypic correlations ranged between 0.1 and 0.4, with a median value  
307 of 0.29. When stratified by rater, phenotypic correlations were more heavily centered around 0.4  
308 (see Supplementary Figure 1). The maximum number of correlations within cohort at a specific age is  
309 three based on four raters, with the largest number of observations within age-bin around age 12  
310 years. Within this age group, phenotypic correlations among raters ranged between 0.22 and 0.65,  
311 with a median of 0.34. The lowest phenotypic correlations were seen between teachers and parents.

312 Since limited data were available on individuals of non-European ancestry, we restricted analyses to  
313 individuals of European ancestry.

314 In total, 29 cohorts contributed 163 GWASs, based on 328 935 observations from 87 485  
315 unique individuals (Supplementary Table 2). Children were 1.5 to 18 years old at assessment, or  
316 retrospectively assessed at these ages. Cohorts supplied between 1 and 26 univariate GWASs.  
317 Approximately 50% of the subjects were males. Most GWASs were based on maternal- (52.4%) and  
318 self-assessment (25.1%), with the remainder based on teacher (12.4%) and paternal report (10.1%).  
319 After QC, applied to the univariate GWASs, between 3.47M SNPs and 7.28M SNPs were retained for  
320 meta-analysis (see Supplementary Figure 2 and Supplementary Table 9). Note that the wide range of  
321 retained SNPs is a result of applying more stringent QC filters for GWASs with smaller sample sizes  
322 and that GWASs with comparable sample sizes returned roughly equal number of SNPs (see  
323 Supplementary Text and Supplementary Figure 2).

324

### 325 **Meta-analysis**

326 Within cohort measures of AGG may be dependent due to including repeated measures of AGG over  
327 age and measures from multiple raters. To account for the effect of sample overlap, we applied a  
328 modified version of the multivariate meta-analysis approach developed by Baselmans *et al*<sup>25</sup> (see  
329 Table 1). Instead of estimating the dependence among GWASs based on the cross-trait-intercept  
330 (CTI) with linkage disequilibrium score regression (LDSC)<sup>29,31</sup>, the expected pairwise CTI value was  
331 calculated (Table 1) using the observed sample overlap and phenotypic covariance as sample sizes of  
332 the univariate GWASs were insufficient to run bivariate LDSC. The effective sample size ( $N_{\text{eff}}$ ) was  
333 approximated by the third formula in Table 1. When there is no sample overlap (or a phenotypic  
334 correlation equal to zero) between all GWASs (i.e. CTI is an identity matrix),  $N_{\text{eff}}$  is equal to the sum  
335 of sample sizes.

336 First, we meta-analyzed all available GWASs ( $AGG_{\text{overall}}$ ). Second, we meta-analyzed all  
337 available data within rater (rater-specific GWAMAs). Third, rater-specific age-bins were created for

338 mother- and self-reported AGG based on the mean ages of the subjects in each GWAS (age-specific  
339 GWAMA). To ensure that the age-specific GWAMAs would have sufficient power for subsequent  
340 analyses, age-bins were created such that the total *univariate* number of observations ( $N_{\text{obs}}$ )  
341 exceeded 15 000 (see Supplementary Text and Supplementary Table 12). For father- and teacher-  
342 reported AGG there were insufficient data to run age-specific GWAMAs. Fourth, we performed  
343 instrument-specific GWAMAs for (1) the ASEBA scales and (2) for the SDQ, because for these two  
344 instruments the total *univariate*  $N_{\text{obs}}$  was over 15 000.

345 SNPs that had  $\text{MAF} < 0.01$ ,  $N_{\text{eff}} < 15\ 000$ , or were observed in less than two cohorts were  
346 removed from further analyses. SNP-heritabilities ( $h_{\text{SNP}}^2$ ) were estimated using LDSC<sup>31</sup>.  $r_g$ 's were  
347 calculated across stratified assessments of AGG using LDSC<sup>29</sup>. To ensure sufficient power for the  
348 genetic correlations,  $r_g$  was calculated across stratified assessments of AGG if the Z-score of the  
349  $h_{\text{SNP}}^2$  for the corresponding GWAMA was 4 or higher<sup>29</sup>.

350

### 351 **Gene-based tests**

352 For AGG<sub>overall</sub>, a gene-based analysis was done in MAGMA<sup>32</sup>. The gene-based test combines *P*-values  
353 from multiple SNPs to obtain a test statistic for each gene, while accounting for LD between the  
354 SNPs. From the MAGMA website (see URLs) we obtained (1) a list of 18 087 genes and their start-  
355 and end-positions, and (2) pre-formatted European genotypes from 1 000 Genomes phase 3 for the  
356 reference LD. We applied a Bonferroni correction for multiple testing at  $\alpha = 0.05/18\ 087$ . A lookup for  
357 significant results was performed in GWAS Catalog and PhenoScanner (see URLs).

358

### 359 **Polygenic Scores**

360 All data were meta-analyzed twice more, once omitting all data from the Netherlands Twin Register  
361 (NTR) and once omitting the Australian data from the Queensland Institute for Medical Research  
362 (QIMR,) and the Mater-University of Queensland Study of Pregnancy (MUSP). As the NTR target  
363 sample we considered mother-reported AGG at age 7 ( $N = 4\ 491$ ), which represents the largest NTR

364 univariate stratum. In the QIRM participants, we tested whether our childhood AGG PGS predicted  
365 adult retrospective assessment of their own CD behavior during adolescence ( $N = 10\,706$ ). We  
366 allowed for cohort-specific best practice in the polygenic score analysis. In the NTR, we created 16  
367 sets of PGSs in PLINK1.9<sup>33</sup>, with  $P$ -value thresholds between 1 and  $1.0E-05$  (see Supplementary Table  
368 13). The remaining SNPs were clumped in PLINK. We applied an  $r^2$ -threshold of 0.5 and minimum  
369 clumping distance of 250 000 base pair positions<sup>33</sup>. Age, age<sup>2</sup>, sex, first five ancestry-based principal  
370 components, a SNP-array variable, and interaction terms between sex and age, and sex and age<sup>2</sup>  
371 were defined as fixed effects. To account for relatedness, prediction was performed using  
372 generalized equation estimation (GEE) as implemented in the “gee” package (version 4.13-19) in R  
373 (version 3.5.3). GEE applies a sandwich correction over the standard errors to account for clustering  
374 in the data<sup>34</sup>. To correct for multiple testing, we applied an FDR correction at  $\alpha=0.05$  for 16 tests.  
375 QIMR excluded SNPs with low imputation quality ( $r^2 = 0.6$ ) and MAF below 1% and selected the most  
376 significant independent SNPs using PLINK1.9<sup>35</sup> (criteria linkage disequilibrium  $r^2 = 0.1$  within  
377 windows of 10 MBp). We calculated different PGS for seven  $P$ -value thresholds ( $p < 1e-5$ ,  $p < 0.001$ ,  $p$   
378  $< 0.01$ ,  $p < 0.05$ ,  $p < 0.1$ ,  $p < 0.5$ , and  $p < 1.0$ ) of the GWAS summary statistics. PGS were calculated from  
379 the imputed genotype dosages to the 1 000 Genomes (Phase 3 Release 5) reference panel. We fitted  
380 linear mixed models, which controlled for relatedness using a Genetic Relatedness Matrix (GRM) and  
381 covariates sex, age, two dummy variables for the GWAS array used, and the first five genetic  
382 principal components. The parameters of the model were estimated using GCTA 1.9<sup>36</sup> The linear  
383 model was as follows:

$$CD\ symptom\ score = intercept + Covariates * b + c * PGS + G$$

384 where  $b$  and  $c$  represent the vectors of fixed effects; and  $G \sim N(0, GRM * \sigma^2 G)$  represents the  
385 random effect that models the sample relatedness, with  $GRM$  being the  $N$  by  $N$  matrix of  
386 relatedness estimated from SNPs and  $N = 10\,706$  is the number of individuals.

387

### 388 Genetic correlations with external phenotypes

389 We computed  $r_g$ 's between  $AGG_{overall}$  and a set of preselected outcomes ( $N=46$ ; collectively referred  
390 to as "external phenotypes"; Supplementary Table 14). Phenotypes were selected based on  
391 established hypotheses with AGG and the availability of sufficiently powered GWAS summary  
392 statistics. We restricted  $r_g$ 's to phenotypes for which the Z-scores of the LDSC-based  $h_{SNP}^2 \geq 4$ <sup>29</sup>.  
393 Next, we estimated  $r_g$ 's for all rater-specific assessments of AGG (except for father-reported AGG).  
394 Genomic Structural Equation Modelling (Genomic SEM)<sup>37</sup> was applied to test if  $r_g$ 's were significantly  
395 different across raters. Specifically, for every phenotype, we tested whether (1) all three  $r_g$ 's  
396 between the external phenotype and rater-specific assessment of AGG, i.e. mother, teacher or self-  
397 ratings, could be constrained at zero, and (2) whether  $r_g$ 's could be constrained to be equal across  
398 raters. A  $\chi^2$  difference test was applied to assess whether imposing the constraints resulted in a  
399 significant worse model fit compared to a model where the  $r_g$ 's between the phenotype and three  
400 rater-specific assessment of AGG were allowed to differ. We applied an FDR correction at  $\alpha=0.05$   
401 over two models for 46 external phenotypes, for a total of 92 tests. An FDR correction for  $4 \times 46=184$   
402 tests was applied to correct for multiple testing of whether the genetic correlations were  
403 significantly different from zero.

404

## 405 **Results**

### 406 **Overall GWAMA**

407 We first meta-analyzed the effect of each SNP across all available univariate GWASs. Assuming an  
408  $N_{eff}$  of 151 741, the  $h_{SNP}^2$  of  $AGG_{overall}$  was estimated at 3.31% (SE=0.0038). The mean  $\chi^2$ -statistic was  
409 1.12 along with an LDSC-intercept of 1.02 (SE=0.01). This indicated that a small, but significant, part  
410 of the inflation in test statistics might have been due to confounding biases, which can either reflect  
411 population stratification or subtle misspecification of sample overlap within cohorts. No genome-  
412 wide significant hits were found for  $AGG_{overall}$  (Figure 1). The list of suggestive associations ( $P<1.0E-05$ )  
413 is provided in Supplementary Table 15. SNPs were annotated with SNPnexus (see URLs). The  
414 strongest association, in terms of significance, was located on chromosome 2 (rs2570485;  $P=2.0E-$

415 07). The SNP is located inside a gene desert, without any gene in 400Kbp in any direction. The  
416 second strongest independent association was found with rs113599846 ( $P=4.3E-07$ ), which is  
417 located inside an intronic region of *TNRC18* on chromosome 7. None of the suggestive associations  
418 have previously been reported for AGG or AGG-related traits <sup>1</sup>.

419 We tested previously reported genome-wide significant associations for AGG <sup>1</sup> and  
420 performed a lookup in AGG<sub>overall</sub>. We restricted lookup to associations with autosomal SNPs that  
421 were found in samples of European ancestry, resulting in three loci. One genome-wide significant hit  
422 was reported for adult antisocial personality disorder (rs4714329; OR=0.63<sup>1</sup>;  $P=1.64E-09$ )<sup>38</sup>. The  
423 same SNP, however, had an opposite direction of effect in AGG<sub>overall</sub> ( $\beta=0.0022$ ;  $P=0.41$ ). Tielbeek *et*  
424 *al*<sup>39</sup> reported two genome-wide significant hits for antisocial behavior, one on chromosome 1  
425 (rs2764450) and one on chromosome 11 (rs11215217). While both SNPs have the same direction of  
426 effect, neither SNP is associated with AGG<sub>overall</sub> (both  $P>0.5$ ).

427

#### 428 **Gene-based analysis**

429 After correction for multiple testing, the gene-based analysis returned three significant results  
430 (Supplementary Table 16): *ST3GAL3* (ST3 beta-galactoside alpha-2,3-sialyltransferase3;  $P=1.6E-06$ ),  
431 *PCDH7* (protocadherin 7;  $P=2.0E-06$ ) and *IPO13* (importin 13;  $P=2.5E-06$ ). *ST3GAL3* codes for a type II  
432 membrane protein that is involved in catalyzing the transfer of sialic acid from CMP-sialic acid to  
433 galactose-containing substrates. *ST3GAL3* has been implicated in 107 GWASs, most notably on  
434 intelligence and educational attainment. The top SNP in *ST3GAL3* (rs2485997;  $P=2.48E-06$ ) is in  
435 strong LD ( $r^2>0.8$ ) with several other SNPs inside the gene body of *ST3GAL3* and in moderate LD  
436 ( $r^2>0.6$ ) with SNPs in several neighboring genes (Supplementary Figure 3). *PCDH7* codes for a protein  
437 that is hypothesized to function in cell-cell recognition and adhesion. *PCDH7* has been implicated in  
438 196 previous GWASs, for example educational attainment and adventurousness. The top SNP for  
439 *PCDH7* (rs13138213;  $P=1.44E-06$ ) is in strong LD ( $r^2>0.8$ ) with a small number of other closely located

---

<sup>1</sup> odds ratio was signed to the other allele in the original study

440 SNPs and the signal for the gene-based test appears to be driven by two independent loci  
441 (Supplementary Figure 4). *IPO13* codes for a nuclear transport protein. *IPO13* has been implicated in  
442 the UKB GWASs on whether a person holds a college or university degree and intelligence. The top  
443 SNP (rs3791116;  $P=1.19E-05$ ) is in moderate to strong LD with multiple SNPs (Supplementary Figure  
444 5), including SNPs in the neighboring *ST3GAL3* gene.

445

#### 446 **Polygenic prediction**

447 In children, 11 out of 16 polygenic scores were significantly correlated with mother-reported AGG in  
448 7-year-olds (Figure 2) after correction for multiple testing. The scores explained between 0.036%  
449 and 0.44% of the phenotypic variance. The significant correlations consistently emerged when  
450 scores including SNPs with P-values above 0.002 in the discovery GWAS were considered. In the  
451 retrospective assessments of adolescent CD, the PGS calculated at various thresholds (Figure 3)  
452 explained up to 0.2% of the variance in symptom sum scores. Generally, CD is significantly predicted  
453 at most thresholds, although, as we would expect based on the SNP-heritability of  $AGG_{overall}$ , the  
454 proportion of explained variance is small.

455

#### 456 **Genetic correlation with external phenotypes**

457 Genetic correlations between  $AGG_{overall}$  and a set of preselected external phenotypes are shown in  
458 Figure 4 and Supplementary Table 17. These phenotypes can broadly be grouped into psychiatric  
459 and psychological traits, substance use, cognitive ability, anthropometric traits, classic biomarkers of  
460 AGG, reproductive traits, and sleeping behavior. We included childhood phenotypes (e.g. birth  
461 weight and childhood IQ) and disorders (e.g. ADHD and autism spectrum disorder [ASD]), but the  
462 majority of phenotypes were adult characteristics or characteristics measured in adult samples.  
463 After correction for multiple testing, 36 phenotypes showed a significant  $r_g$  with  $AGG_{overall}$  ( $P<0.02$ ).  
464 In general, the highest positive correlations were seen with psychiatric traits, notably ADHD, ASD,  
465 and major depressive disorder (MDD). The largest negative genetic correlations were found for age

466 at smoking initiation, childhood IQ, and age at first birth. Based on the biomarker-aggression  
467 literature, we tested for the presence of genetic correlations between  $AGG_{overall}$ , and lipids, heart rate,  
468 heart rate variability, and testosterone levels. Very low genetic correlations were observed for  
469  $AGG_{overall}$ , and these biomarkers, with in many cases the sign of the genetic correlation opposite to  
470 what was expected based on the literature on biomarkers of AGG.

471

#### 472 **Stratified assessment of childhood aggressive behavior**

473 Separate meta-analyses were carried out for raters, instruments and age. None of these GWAMAs  
474 returned genome-wide significant hits. Manhattan plots for the four rater-specific GWAMAs are  
475 shown in Supplementary Figure 6. Estimates of  $h_{SNP}^2$  for rater-specific assessment of AGG are shown  
476 in Supplementary Table 18. The lowest  $h_{SNP}^2$  was observed for father-reported AGG ( $h_{SNP}^2=0.04$ ;  
477  $SE=0.03$ ) and the highest for teacher-reported AGG ( $h_{SNP}^2=0.08$ ;  $SE=0.02$ ). We estimated  $r_g$  between  
478 rater-specific assessment of AGG, except for father-reported AGG, which returned a non-significant  
479  $h_{SNP}^2$ . A substantial genetic correlation was observed between  $AGG_{Mother}$  and  $AGG_{Teacher}$  ( $r_g=0.81$ ;  
480  $SE=0.11$ ). Moderate genetic correlations were observed between  $AGG_{self}$  and  $AGG_{Mother}$  ( $r_g=0.67$ ;  
481  $SE=0.10$ ), and between  $AGG_{self}$  and  $AGG_{Teacher}$  ( $r_g=0.46$ ;  $SE=0.13$ ). Both genetic correlations involving  
482 self-reported AGG were significantly lower than 1.

483 We performed a GWAMA across all GWASs where an ASEBA scale was used ( $AGG_{ASEBA}$ ) and  
484 another GWAMA across all GWASs for the SDQ ( $AGG_{SDQ}$ ). SNP-heritabilities for  $AGG_{ASEBA}$  and  $AGG_{SDQ}$   
485 were 0.031 ( $SE=0.0099$ ) and 0.026 ( $SE=0.0086$ ), respectively. The GWAMAs were insufficiently  
486 powered to estimate  $r_g$  across instrument-specific assessment of AGG.

487 Age-specific GWAMAs were performed for mother- and self-reported AGG, which made up  
488 77.5% of the data. Mother-reported data were split into seven age-bins and self-reported data into  
489 three (Supplementary Table 12). Estimates of the  $h_{SNP}^2$  for each age-specific GWAMA can be found  
490 in Supplementary Table 19. For mother-reported AGG,  $h_{SNP}^2$  ranged between 0.012 and 0.078. For  
491 self-reported AGG, the highest  $h_{SNP}^2$  was seen for the retrospective data ( $h_{SNP}^2=0.12$ ;  $SE=0.03$ ), which



492 also showed a significantly inflated intercept (1.05; SE=0.01).  $r_g$  could only be estimated between  
493 AGG<sub>M7</sub>, AGG<sub>S13</sub> and AGG<sub>SR</sub> (Supplementary Table 20).

494

#### 495 **Genetic correlation between rater-specific assessment of AGG and external phenotypes**

496 We estimated rater-specific  $r_g$ 's with the external phenotypes, except for father-reported AGG, and  
497 tested for each external phenotype whether these  $r_g$ 's could be constrained to be equal to zero. For  
498 31 out of 46 external phenotypes, constraining the  $r_g$ 's to be equal to zero for all three raters  
499 resulted in significant reduction in model fit (Supplementary Table 21), indicating that, for these  
500 external phenotypes, at least one rater has an  $r_g$  that is significantly different from zero.

501 Next, we tested for each external phenotype whether the three rater-specific  $r_g$ 's with the  
502 external phenotypes could be constrained to be equal across mothers, teachers and self-ratings. For  
503 ADHD, ASD, MDD, schizophrenia, well-being, and self-reported health, constraining the  $r_g$ 's to be  
504 equal across rater resulted in significantly worse model fit (Supplementary Table 21). For all these  
505 phenotypes,  $r_g$ 's with teacher-reported AGG were consistently lower compared to mother- and self-  
506 reported AGG (Supplementary Figure 7 and Supplementary Table 17). For lifetime cannabis use,  
507 genetic correlations also could not be constrained to be equal across raters. Here, a relatively strong  
508  $r_g$  was found with self-reported AGG ( $r_g=0.36$ ; SE=0.08) compared to teacher- ( $r_g=0.13$ ; SE=0.07) and  
509 mother-reported AGG ( $r_g=0.08$ ; SE=0.08).

510

#### 511 **Discussion**

512 We present the largest genome-wide association meta-analysis (GWAMA) of childhood aggressive  
513 behavior (AGG) to date. The gene-based analysis implicated three genes, *PCDH7*, *ST3GAL3* and *IPO13*,  
514 based on the overall meta-analysis (AGG<sub>overall</sub>), which did not return genome-wide significant SNPs.  
515 Lead SNPs in the implicated genes were related to educational outcomes, but did not reach genome-  
516 wide significance and these loci require further evidence before being considered as AGG risk  
517 variants. Polygenic scores (PGS) predicted childhood AGG and retrospectively assessed adolescent

518 CD. Stratified analyses within AGG generally returned moderate to strong genetic correlations across  
519 raters. We found substantial genetic correlations between  $AGG_{overall}$  and a list of preselected external  
520 phenotypes from various domains, including, psychiatry and psychology, cognition, anthropometric  
521 and reproductive traits. Most notably was the perfect  $r_g$  between  $AGG_{overall}$  and ADHD ( $r_g=1.00$ ;  
522  $SE=0.07$ ). This is in line with the moderate-to-strong phenotypic correlations that have consistently  
523 been found across sex-, rater-, age- and instrument-specific assessment of AGG with attention  
524 problems and hyperactivity<sup>15</sup>. Significant genetic correlations were further observed with other  
525 psychiatric and psychological traits (range  $|r_g|$ : 0.19 – 0.55). Negative genetic correlations ( $r_g \sim -0.5$ )  
526 were found with all three traits from the cognitive domain. Genetic correlations were positive with  
527 smoking initiation ( $r_g=0.55$ ;  $SE=0.04$ ) and smoking quantity ( $r_g=0.46$ ;  $SE=0.06$ ), and negative with age  
528 at smoking initiation ( $r_g=-0.60$ ;  $SE=0.09$ ).

529 We examined genetic correlations with classical biomarkers of aggressive behavior. Higher  
530 levels of aggression have been associated with lower levels of LDL<sup>40</sup> and lower resting heart rate<sup>41,42</sup>.  
531 We found a positive, albeit weak,  $r_g$  between  $AGG_{overall}$  and LDL ( $r_g=0.15$ ;  $SE=0.07$ ), which has an  
532 opposite sign than what was expected based on the literature [39]. More broadly, except for HDL  
533 ( $r_g=-0.13$ ;  $SE=0.07$ ), all measures of lipid levels returned significant positive  $r_g$ 's with  $AGG_{overall}$ , albeit  
534 weakly ( $r_g < 0.2$ ). No heart rate measure showed a significant genetic correlation with  $AGG_{overall}$ . The  
535 relationship between testosterone levels and (childhood) AGG in the literature is, at best, unclear. A  
536 positive association between AGG and testosterone is often assumed, but the relation may be more  
537 complex<sup>43</sup>. Both positive and negative phenotypic correlations have been found and seem context-  
538 dependent<sup>44</sup>. We found significant negative,  $r_g$ 's between  $AGG_{overall}$  and testosterone levels in males  
539 and females ( $|r_g| < 0.15$ ). These should be interpreted with some caution because of the design of the  
540 GWA studies: AGG was measured in children and young adolescents whereas testosterone levels  
541 were measured in adults in the UK Biobank<sup>45</sup>, and genetic stability of testosterone levels might be  
542 low, at least for males<sup>46</sup>. Genetic correlations with reproductive traits showed a positive relation

543 with having more children ( $r_g=0.27$ ; SE=0.08) and having offspring earlier in life ( $r_g=-0.60$ ; SE=0.06),  
544 tending to confirm that not all associated outcomes are harmful.

545 The stratified design of our study also allowed for examination of the genetic etiology of  
546 AGG in subsets of the data and examination of genetic correlations among raters. We found a high  
547 genetic correlation between AGG<sub>Mother</sub> and AGG<sub>Teacher</sub> ( $r_g=0.81$ ; SE=0.11). However, the 95%  
548 confidence interval covers 1, which makes these results hard to reconcile with previous findings of  
549 rater-specific additive genetic effects in childhood AGG<sup>47</sup>. Most external phenotypes showed  
550 comparable  $r_g$ 's with mother-, self-, and teacher-reported AGG. For ADHD, ASD, MDD, schizophrenia,  
551 well-being, and self-reported health,  $r_g$ 's differed significantly across raters. Weaker  $r_g$ 's were  
552 consistently found in teacher-reported AGG compared to mother- and self-reported AGG. These  
553 findings indicate the presence of rater-specific effects when considering the genetic correlation of  
554 AGG with other outcomes.  $r_g$ 's are generally stronger in the psychopathology and psychological  
555 domains. A lack of power, however, seems insufficient to explain why we found weaker  $r_g$ 's between  
556 AGG<sub>Teacher</sub> and phenotypes from these two domains. Other phenotypes, like smoking behavior,  
557 educational attainment or age at first birth, are, like psychopathological phenotypes, highly  
558 genetically correlated with AGG<sub>overall</sub>, but, unlike psychopathologies, have near identical  $r_g$ 's across  
559 raters. The rater-specific effects on  $r_g$ 's between childhood AGG and external phenotypes might be  
560 limited to psychopathologies, and future research into the genetics of childhood psychopathology  
561 might consider these nuances in effects of assessment of childhood AGG from various sources, be  
562 that multiple raters, instruments, and ages.

563 Despite the considerable sample sizes, we were still underpowered to compute genetic  
564 correlations with external phenotypes while stratifying AGG over age or instrument. Age-stratified  
565 GWASs in larger samples across development are a desirable target for future research. Because  
566 genetic correlations can be computed between phenotypes for which a well-powered GWAS is  
567 available, age-stratified GWAS of many developmental phenotypes, behavioral, cognitive and  
568 neuroscientific can be leveraged to better understand development of childhood traits.

569 We note that multivariate results should be interpreted with some caution. While combining  
570 data from correlated traits can indeed improve power to identify genome-wide associations,  
571 interpreting the phenotype may not be straightforward. In the current GWAMA, we have referred to  
572 our phenotype as “aggressive behavior” and interpreted the results accordingly. Aggressive behavior,  
573 however, is an umbrella term that has been used to identify a wide range of distinct – though  
574 correlated – traits and behaviors<sup>1</sup>.

575 Genome-wide association studies are increasingly successful in identifying genomic loci for  
576 complex human traits<sup>48</sup> and also in psychiatry, genetic biomarkers are increasingly thought of as  
577 promising for both research and treatment. Genetic risk prediction holds promise for adult  
578 psychiatric disorders<sup>30</sup> and it seems reasonable to expect the same for childhood disorders. Here we  
579 found that polygenic scores explain up to 0.44% of the phenotypic variance in AGG in 7-year-olds  
580 and 0.2% of the variance in retrospectively reported adolescent CD. Note that differences in ages,  
581 instrument and local best-practices have led to differences in explained variance. Future studies may  
582 explore the utility of these PGSs in illuminating pleiotropy between  $AGG_{overall}$  and other traits. A  
583 limiting factor in this regard is the relatively low SNP-heritability, which puts an upper bound on the  
584 predictive accuracy of PGSs. Since measurement error suppresses SNP-heritability, better  
585 measurement may offer an avenue to higher powered GWAS, and subsequently to better PGS.  
586 Furthermore, sample sizes for developmental phenotypes, including AGG may need to increase by  
587 one to two orders of magnitude before PGS become useful for individual patients.

588 Despite our extensive effort, the first genome-wide significant SNP for childhood AGG has  
589 yet to be found. Even in the absence of genome-wide significant loci, however, GWASs aid in  
590 clarifying the biology behind complex traits. Our results show that, even without genome-wide  
591 significant hits, a GWAS can be powerful enough to illuminate the genetic etiology of a trait in the  
592 form of  $r_g$ 's with other complex traits. Non-significant associations are expected to capture part of  
593 the polygenicity of a trait<sup>31</sup> and various follow up-analyses have been developed for GWASs that do  
594 not require, but are aided by, genome-wide significant hits<sup>49</sup>. Polygenic scores aggregate SNP effects

595 into a weighted sum that indicates a person's genetic liability to develop a disorder. While their  
596 clinical application is still limited in psychiatric disorders, they can already aid in understanding the  
597 pleiotropy among psychiatric and other traits<sup>30</sup>. Similarly, summary statistics-based genetic  
598 correlations ( $r_g$ ) provide insight into the genetic overlap between complex traits<sup>29,50</sup>.  
599

## 600 **URLs**

601 GWAS SOP: <http://www.action-euproject.eu/content/data-protocols>

602 MAGMA: <https://ctg.cncr.nl/software/magma>

603 SNPnexus: <https://www.snp-nexus.org/index.html> (accessed on 28-8-2019)

604 GWAS Catalog: <https://www.ebi.ac.uk/gwas/> (accessed on 29-8-2019)

605 PhenoScanner: <http://www.phenoscanter.medschl.cam.ac.uk/> (accessed on 29-8-2019)

606

## 607 **Acknowledgements**

608 We very warmly thank all participants, their parents and teachers for making this study possible. The  
609 project was supported by the “Aggression in Children: Unraveling gene-environment interplay to  
610 inform Treatment and InterventiON strategies” project (ACTION). ACTION received funding from the  
611 European Union Seventh Framework Program (FP7/2007-2013) under grant agreement no 602768.  
612 Cohort specific acknowledgements and funding information may be found in Supplemental Text.

613

614 **Author contributions** may be found in Supplemental Text

615

## 616 **Conflict of interests**

617 Miquel Casas has received travel grants and research support from Eli Lilly and Co., Janssen-Cilag,  
618 Shire and Lundbeck and served as consultant for Eli Lilly and Co., Janssen-Cilag, Shire and Lundbeck.  
619 Josep Antoni Ramos Quiroga was on the speakers’ bureau and/or acted as consultant Eli-Lilly,  
620 Janssen-Cilag, Novartis, Shire, Lundbeck, Almirall, Braingaze, Sincrolab, Medicine, Exeltis and Rubió  
621 in the last 5 years. He also received travel awards (air tickets + hotel) for taking part in psychiatric  
622 meetings from Janssen-Cilag, Rubió, Shire, Medice and Eli-Lilly. The Department of Psychiatry  
623 chaired by him received unrestricted educational and research support from the following  
624 companies in the last 5 years: Eli-Lilly, Lundbeck, Janssen-Cilag, Actelion, Shire, Ferrer, Oryzon, Roche,  
625 Psious, and Rubió.

626

627 **References**

- 628 1 Odintsova V V *et al.* Genomics of human aggression: current state of genome-wide studies  
629 and an automated systematic review tool. *Psychiatr Genet* 2019; **29**: 170–190.
- 630 2 Baron RA, Richardson DR. *Human Aggression*. 2nd ed. New York, 1994.
- 631 3 Anderson CA, Bushman BJ. Human aggression. *Annu Rev Psychol* 2002; **53**: 27–51.
- 632 4 Veroude K *et al.* Genetics of aggressive behavior: An overview. *Am J Med Genet Part B*  
633 *Neuropsychiatr Genet* 2016; **171**: 3–43.
- 634 5 Tuvblad C, Baker LA. Human aggression across the lifespan: genetic propensities and  
635 environmental moderators. *Adv Genet* 2011; **75**: 171–214.
- 636 6 Bongers IL, Koot HM, van der Ende J, Verhulst FC. Developmental Trajectories of Externalizing  
637 Behaviors in Childhood and Adolescence. *Child Dev* 2004; **75**: 1523–1537.
- 638 7 Tremblay RE, Vitaro F, Côté SM. Developmental Origins of Chronic Physical Aggression: A Bio-  
639 Psycho-Social Model for the Next Generation of Preventive Interventions. *Annu Rev Psychol*  
640 2018; **69**: 383–407.
- 641 8 Huesmann LR, Dubow EF, Boxer P. Continuity of aggression from childhood to early  
642 adulthood as a predictor of life outcomes: Implications for the adolescent-limited and life-  
643 course-persistent models. *Aggress Behav* 2009; **35**: 136–149.
- 644 9 Zhang-James Y, Faraone S V. Genetic architecture for human aggression: A study of gene-  
645 phenotype relationship in OMIM. *Am J Med Genet Part B Neuropsychiatr Genet* 2016; **171**:  
646 641–649.
- 647 10 American Psychiatric Association. *Diagnostic and Statistical Manual of Mental Disorders, Fifth*  
648 *Edition*. American Psychiatric Association: Arlington, 2013.
- 649 11 Foster EM, Jones DE, The Conduct Problems Prevention Research Group. The high costs of  
650 aggression: public expenditures resulting from conduct disorder. *Am J Public Health* 2005; **95**:  
651 1767–72.

- 652 12 Walton KE, Ormel J, Krueger RF. The dimensional nature of externalizing behaviors in  
653 adolescence: Evidence from a direct comparison of categorical, dimensional, and hybrid  
654 models. *J Abnorm Child Psychol* 2011; **39**: 553–561.
- 655 13 Walters GD, Ruscio J. Trajectories of youthful antisocial behavior: Categories or continua? *J*  
656 *Abnorm Child Psychol* 2013; **41**: 653–666.
- 657 14 Barry TD, Marcus DK, Barry CT, Coccaro EF. The latent structure of oppositional defiant  
658 disorder in children and adults. *J Psychiatr Res* 2013; **47**: 1932–1939.
- 659 15 Bartels M *et al.* Childhood aggression and the co-occurrence of behavioural and emotional  
660 problems: results across ages 3–16 years from multiple raters in six cohorts in the EU-ACTION  
661 project. *Eur Child Adolesc Psychiatry* 2018; **27**: 1105–1121.
- 662 16 Whipp AM *et al.* Teacher-rated aggression and co-occurring problems and behaviors among  
663 schoolchildren: A comparison of four population-based European cohorts. *medRxiv* 2019; :  
664 19002576.
- 665 17 Heron J *et al.* Childhood conduct disorder trajectories, prior risk factors and cannabis use at  
666 age 16: birth cohort study. *Addiction* 2013; **108**: 2129–2138.
- 667 18 Rivenbark JG *et al.* The high societal costs of childhood conduct problems: evidence from  
668 administrative records up to age 38 in a longitudinal birth cohort. *J Child Psychol Psychiatry*  
669 2018; **59**: 703–710.
- 670 19 Odgers CL *et al.* Female and male antisocial trajectories: From childhood origins to adult  
671 outcomes. *Dev Psychopathol* 2008; **20**: 673–716.
- 672 20 Whipp AM *et al.* Early adolescent aggression predicts antisocial personality disorder in young  
673 adults: a population-based study. *Eur Child Adolesc Psychiatry* 2019; **28**: 341–350.
- 674 21 Hawley PH, Little TD, Rodkin PC. *Aggression and adaptation: The bright side to bad behavior*.  
675 1st ed. Routledge: New York, 2007 doi:<https://doi.org/10.4324/9780203936900>.
- 676 22 Hawley PH. Social Dominance in Childhood and Adolescence: Why Social Competence and  
677 Aggression May Go Hand in Hand. In: Hawley PH, Little TD, Rodkin PC (eds). *Aggression and*



- 678            *Adaptation: The Bright Side to Bad Behavior*. Routledge: New York, 2007, pp 1–22.
- 679    23    Waltes R, Chiocchetti AG, Freitag CM. The neurobiological basis of human aggression: A  
680            review on genetic and epigenetic mechanisms. *Am J Med Genet Part B Neuropsychiatr Genet*  
681            2016; **171**: 650–675.
- 682    24    Turley P *et al.* Multi-trait analysis of genome-wide association summary statistics using MTAG.  
683            *Nat Genet* 2018; **50**: 229–237.
- 684    25    Baselmans BML *et al.* Multivariate genome-wide analyses of the well-being spectrum. *Nat*  
685            *Genet* 2019; : 1.
- 686    26    van Beijsterveldt CEM, Bartels M, Hudziak JJ, Boomsma DI. Causes of Stability of Aggression  
687            from Early Childhood to Adolescence: A Longitudinal Genetic Analysis in Dutch Twins. *Behav*  
688            *Genet* 2003; **33**: 591–605.
- 689    27    Porsch RM *et al.* Longitudinal heritability of childhood aggression. *Am J Med Genet Part B*  
690            *Neuropsychiatr Genet* 2016; **171**: 697–707.
- 691    28    Lubke GH, McArtor DB, Boomsma DI, Bartels M. Genetic and environmental contributions to  
692            the development of childhood aggression. *Dev Psychol* 2018; **54**: 39–50.
- 693    29    Bulik-Sullivan BK *et al.* An atlas of genetic correlations across human diseases and traits. *Nat*  
694            *Genet* 2015; **47**: 1236–1241.
- 695    30    Martin AR, Daly MJ, Robinson EB, Hyman SE, Neale BM. Predicting Polygenic Risk of  
696            Psychiatric Disorders. *Biol Psychiatry* 2019; **86**: 97–109.
- 697    31    Bulik-Sullivan BK *et al.* LD Score regression distinguishes confounding from polygenicity in  
698            genome-wide association studies. *Nat Genet* 2015; **47**: 291–295.
- 699    32    de Leeuw CA, Mooij JM, Heskes T, Posthuma D. MAGMA: Generalized Gene-Set Analysis of  
700            GWAS Data. *PLOS Comput Biol* 2015; **11**: e1004219.
- 701    33    Chang CC *et al.* Second-generation PLINK: rising to the challenge of larger and richer datasets.  
702            *Gigascience* 2015; **4**: 7.
- 703    34    Rogers P, Stoner J. Modification of the Sandwich Estimator in Generalized Estimating

- 704 Equations with Correlated Binary Outcomes in Rare Event and Small Sample Settings. *Am J*  
705 *Appl Math Stat* 2015; **3**: 243–251.
- 706 35 Purcell S *et al.* PLINK: a tool set for whole-genome association and population-based linkage  
707 analyses. *Am J Hum Genet* 2007; **81**: 559–575.
- 708 36 Yang J, Lee SH, Goddard ME, Visscher PM. GCTA: a tool for genome-wide complex trait  
709 analysis. *Am J Hum Genet* 2011; **88**: 76–82.
- 710 37 Grotzinger AD *et al.* Genomic structural equation modelling provides insights into the  
711 multivariate genetic architecture of complex traits. *Nat Hum Behav* 2019; : 1.
- 712 38 Rautiainen M-R *et al.* Genome-wide association study of antisocial personality disorder.  
713 *Transl Psychiatry* 2016; **6**: e883–e883.
- 714 39 Tielbeek JJ *et al.* Genome-Wide Association Studies of a Broad Spectrum of Antisocial  
715 Behavior. *JAMA Psychiatry* 2017; **74**: 1242.
- 716 40 Hagenbeek FA *et al.* Adult aggressive behavior in humans and biomarkers: a focus on lipids  
717 and methylation. *J Pediatr Neonatal Individ Med* 2018; **7**: e070204.
- 718 41 Raine A, Fung ALC, Portnoy J, Choy O, Spring VL. Low heart rate as a risk factor for child and  
719 adolescent proactive aggressive and impulsive psychopathic behavior. *Aggress Behav* 2014;  
720 **40**: 290–299.
- 721 42 Latvala A *et al.* Association of Resting Heart Rate and Blood Pressure in Late Adolescence  
722 With Subsequent Mental Disorders. *JAMA Psychiatry* 2016; **73**: 1268.
- 723 43 Brain PF, Susman EJ. Hormonal aspects of aggression and violence. In: *Handbook of antisocial*  
724 *behavior*. John Wiley & Sons Inc.: Hoboken, 1997, pp 314–323.
- 725 44 Ramirez JM. Hormones and aggression in childhood and adolescence. *Aggress Violent Behav*  
726 2003; **8**: 621–644.
- 727 45 Bycroft C *et al.* The UK Biobank resource with deep phenotyping and genomic data. *Nature*  
728 2018; **562**: 203–209.
- 729 46 Harris JA, Vernon PA, Boomsma DI. The Heritability of Testosterone: A Study of Dutch

- 730 Adolescent Twins and Their Parents. *Behav Genet* 1998; **28**: 165–171.
- 731 47 Hudziak JJ *et al.* Individual Differences in Aggression: Genetic Analyses by Age, Gender, and  
732 Informant in 3-, 7-, and 10-Year-Old Dutch Twins. *Behav Genet* 2003; **33**: 575–589.
- 733 48 Visscher PM *et al.* 10 years of GWAS discovery: biology, function, and translation. *Am J Hum*  
734 *Genet* 2017; **101**: 5–22.
- 735 49 Pasaniuc B, Price AL. Dissecting the genetics of complex traits using summary association  
736 statistics. *Nat Rev Genet* 2017; **18**: 117–127.
- 737 50 Watanabe K *et al.* A global overview of pleiotropy and genetic architecture in complex traits.  
738 *Nat Genet* 2019; : 1–10.
- 739
- 740

741 **Figures**

742

743 **Figure 1.** Manhattan plot of overall meta-analysis for childhood aggression ( $AGG_{overall}$ ). Red triangles  
744 represent SNPs that were included in the significant genes from the gene-based analysis. SNPs for  
745 *ST3GAL3* and *IPO13* are included in the same locus on chromosome 1.

746

747 **Figure 2.** Proportion of explained variance (vertical axis) in childhood aggression at age 7 by  
748 polygenic scores from the overall GWAMA for multiple  $P$ -value thresholds (horizontal axis). Numbers  
749 above the bars represent unadjusted  $P$ -values for two-sided test of significance.

750

751 **Figure 3.** Proportion of explained variance (vertical axis) in retrospective adolescent CD (two sided  
752 tests). Blue bars indicate positive correlation with the conduct disorder score.

753

754 **Figure 4.** Genetic correlation with external phenotypes. Phenotypes are ordered by domain. Bars  
755 indicate 95% confidence intervals.

756

757

758 **Table**

759 **Table 1.** (a) multivariate test statistic in the meta-analysis of results based on overlapping samples.  
 760 (b) expected value for the cross-trait-intercept. (c) Effective sample size for a GWAMA.

|                                                                                                                                                                        |                                                                                                                                                                                                                                                                                                                                                                                                                                                                                                                             |
|------------------------------------------------------------------------------------------------------------------------------------------------------------------------|-----------------------------------------------------------------------------------------------------------------------------------------------------------------------------------------------------------------------------------------------------------------------------------------------------------------------------------------------------------------------------------------------------------------------------------------------------------------------------------------------------------------------------|
| $Z_{multi,j}$ $= \frac{\sum_{i=1}^P w_{ji} Z_{ji}}{\sqrt{\sum_{i=1}^P w_{ji} V_{ji} + \sum_{i=1}^P \sum_{k=1}^P \sqrt{w_{ji} w_{jk}} CTI_{ik} \text{ for } i \neq k}}$ | <p>(a)</p> <p>Multivariate test-statistic for <math>j</math>-th SNP. <math>P</math> is the number of GWASs across which we run the meta-analysis; <math>w_{ji} = \sqrt{N_{ji} h_{SNP,i}^2}</math> is the weight given to the <math>j</math>th SNP in GWAS <math>i</math>, with <math>h_{SNP,i}^2</math> being the SNP-heritability of the trait analyzed in GWAS <math>i</math>; and <math>V_{ji} = 1</math> represents the variance of the distribution of <math>Z_{ji}</math> under the null hypothesis of no effect.</p> |
| $CTI_{ik} = \frac{N_s r_p}{\sqrt{N_{ji} N_{jk}}}$                                                                                                                      | <p>(b)</p> <p>Cross-trait-intercept between GWAS <math>i</math> and <math>k</math>. <math>N_s</math> represents the sample overlap; <math>r_p</math> indicates the phenotypic correlation; <math>N_{ji}</math> and <math>N_{jk}</math> are the sample sizes at SNP <math>j</math> for respectively GWASs <math>i</math> and <math>k</math></p>                                                                                                                                                                              |
| $N_{eff} = \sqrt{N}^T CTI^{-1} \sqrt{N}$                                                                                                                               | <p>(c)</p> <p><math>N</math> is an <math>P</math>-sized vector of sample sizes, and <math>CTI</math> is the <math>P \times P</math> matrix of cross-trait-intercepts.</p>                                                                                                                                                                                                                                                                                                                                                   |

761

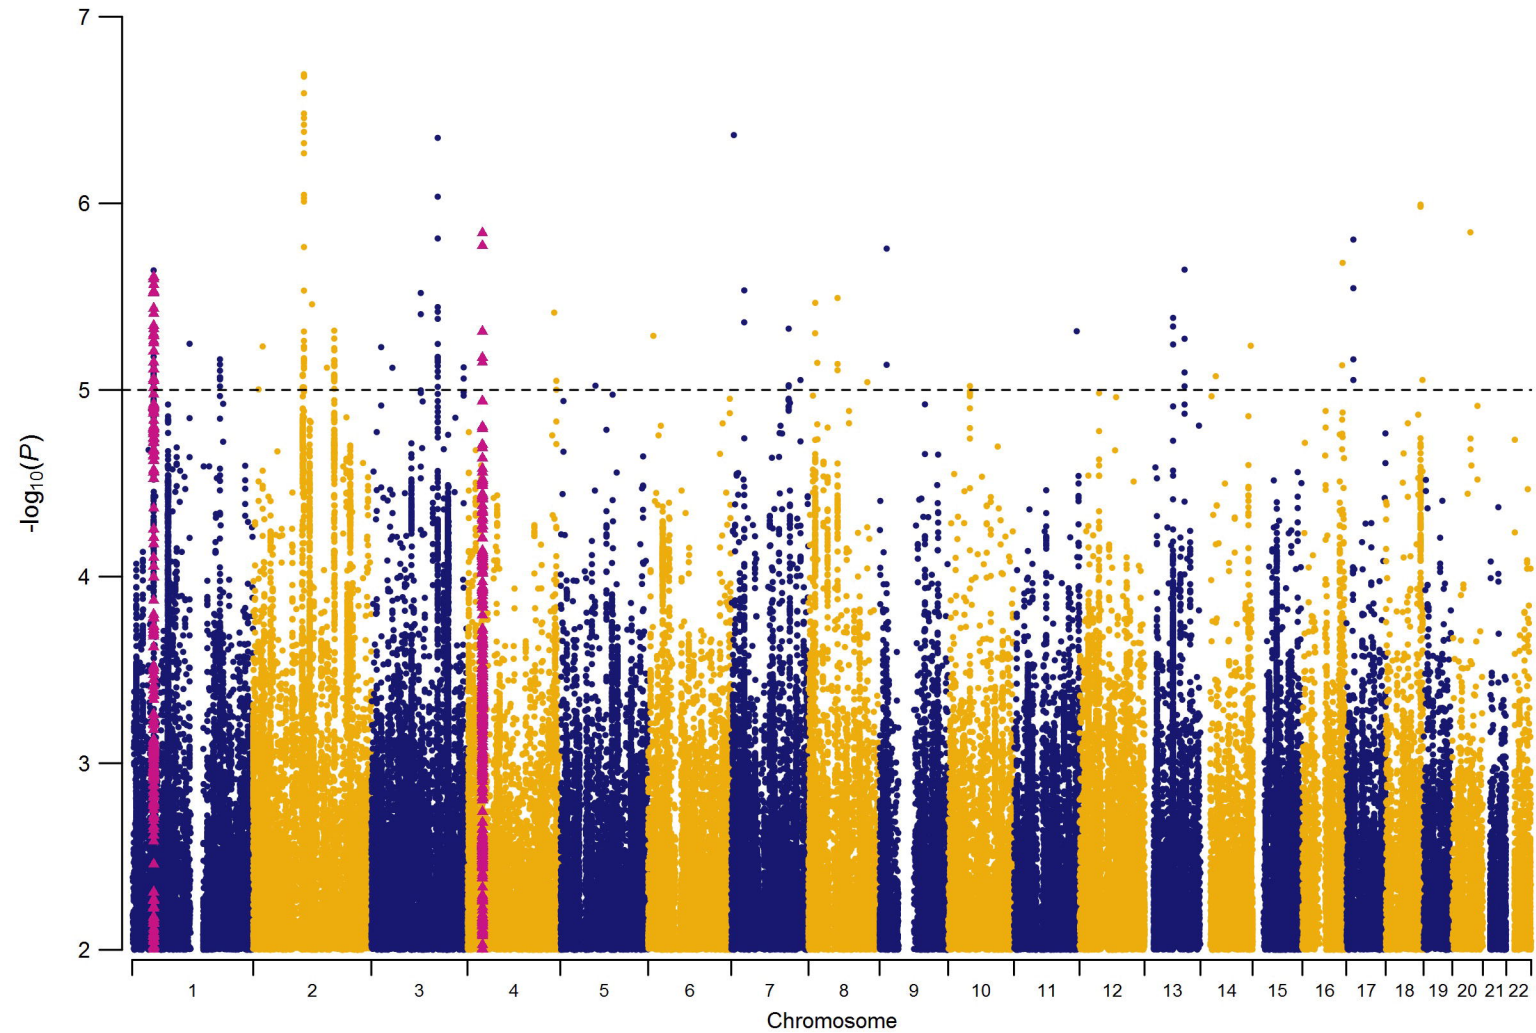

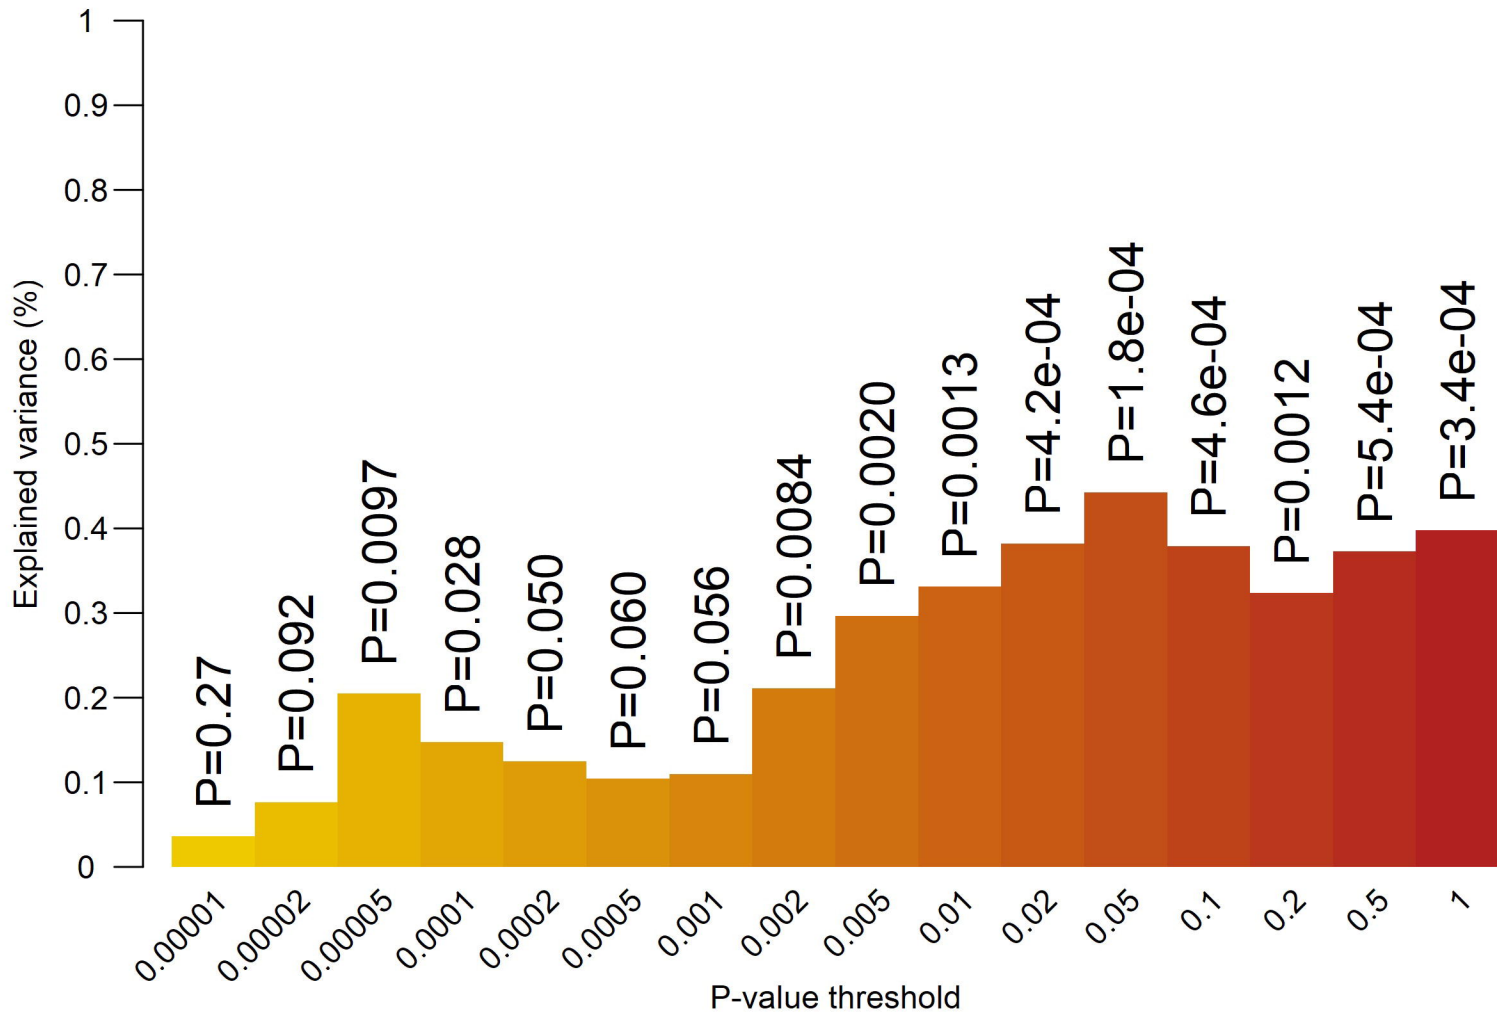

% variance explained conduct disorder

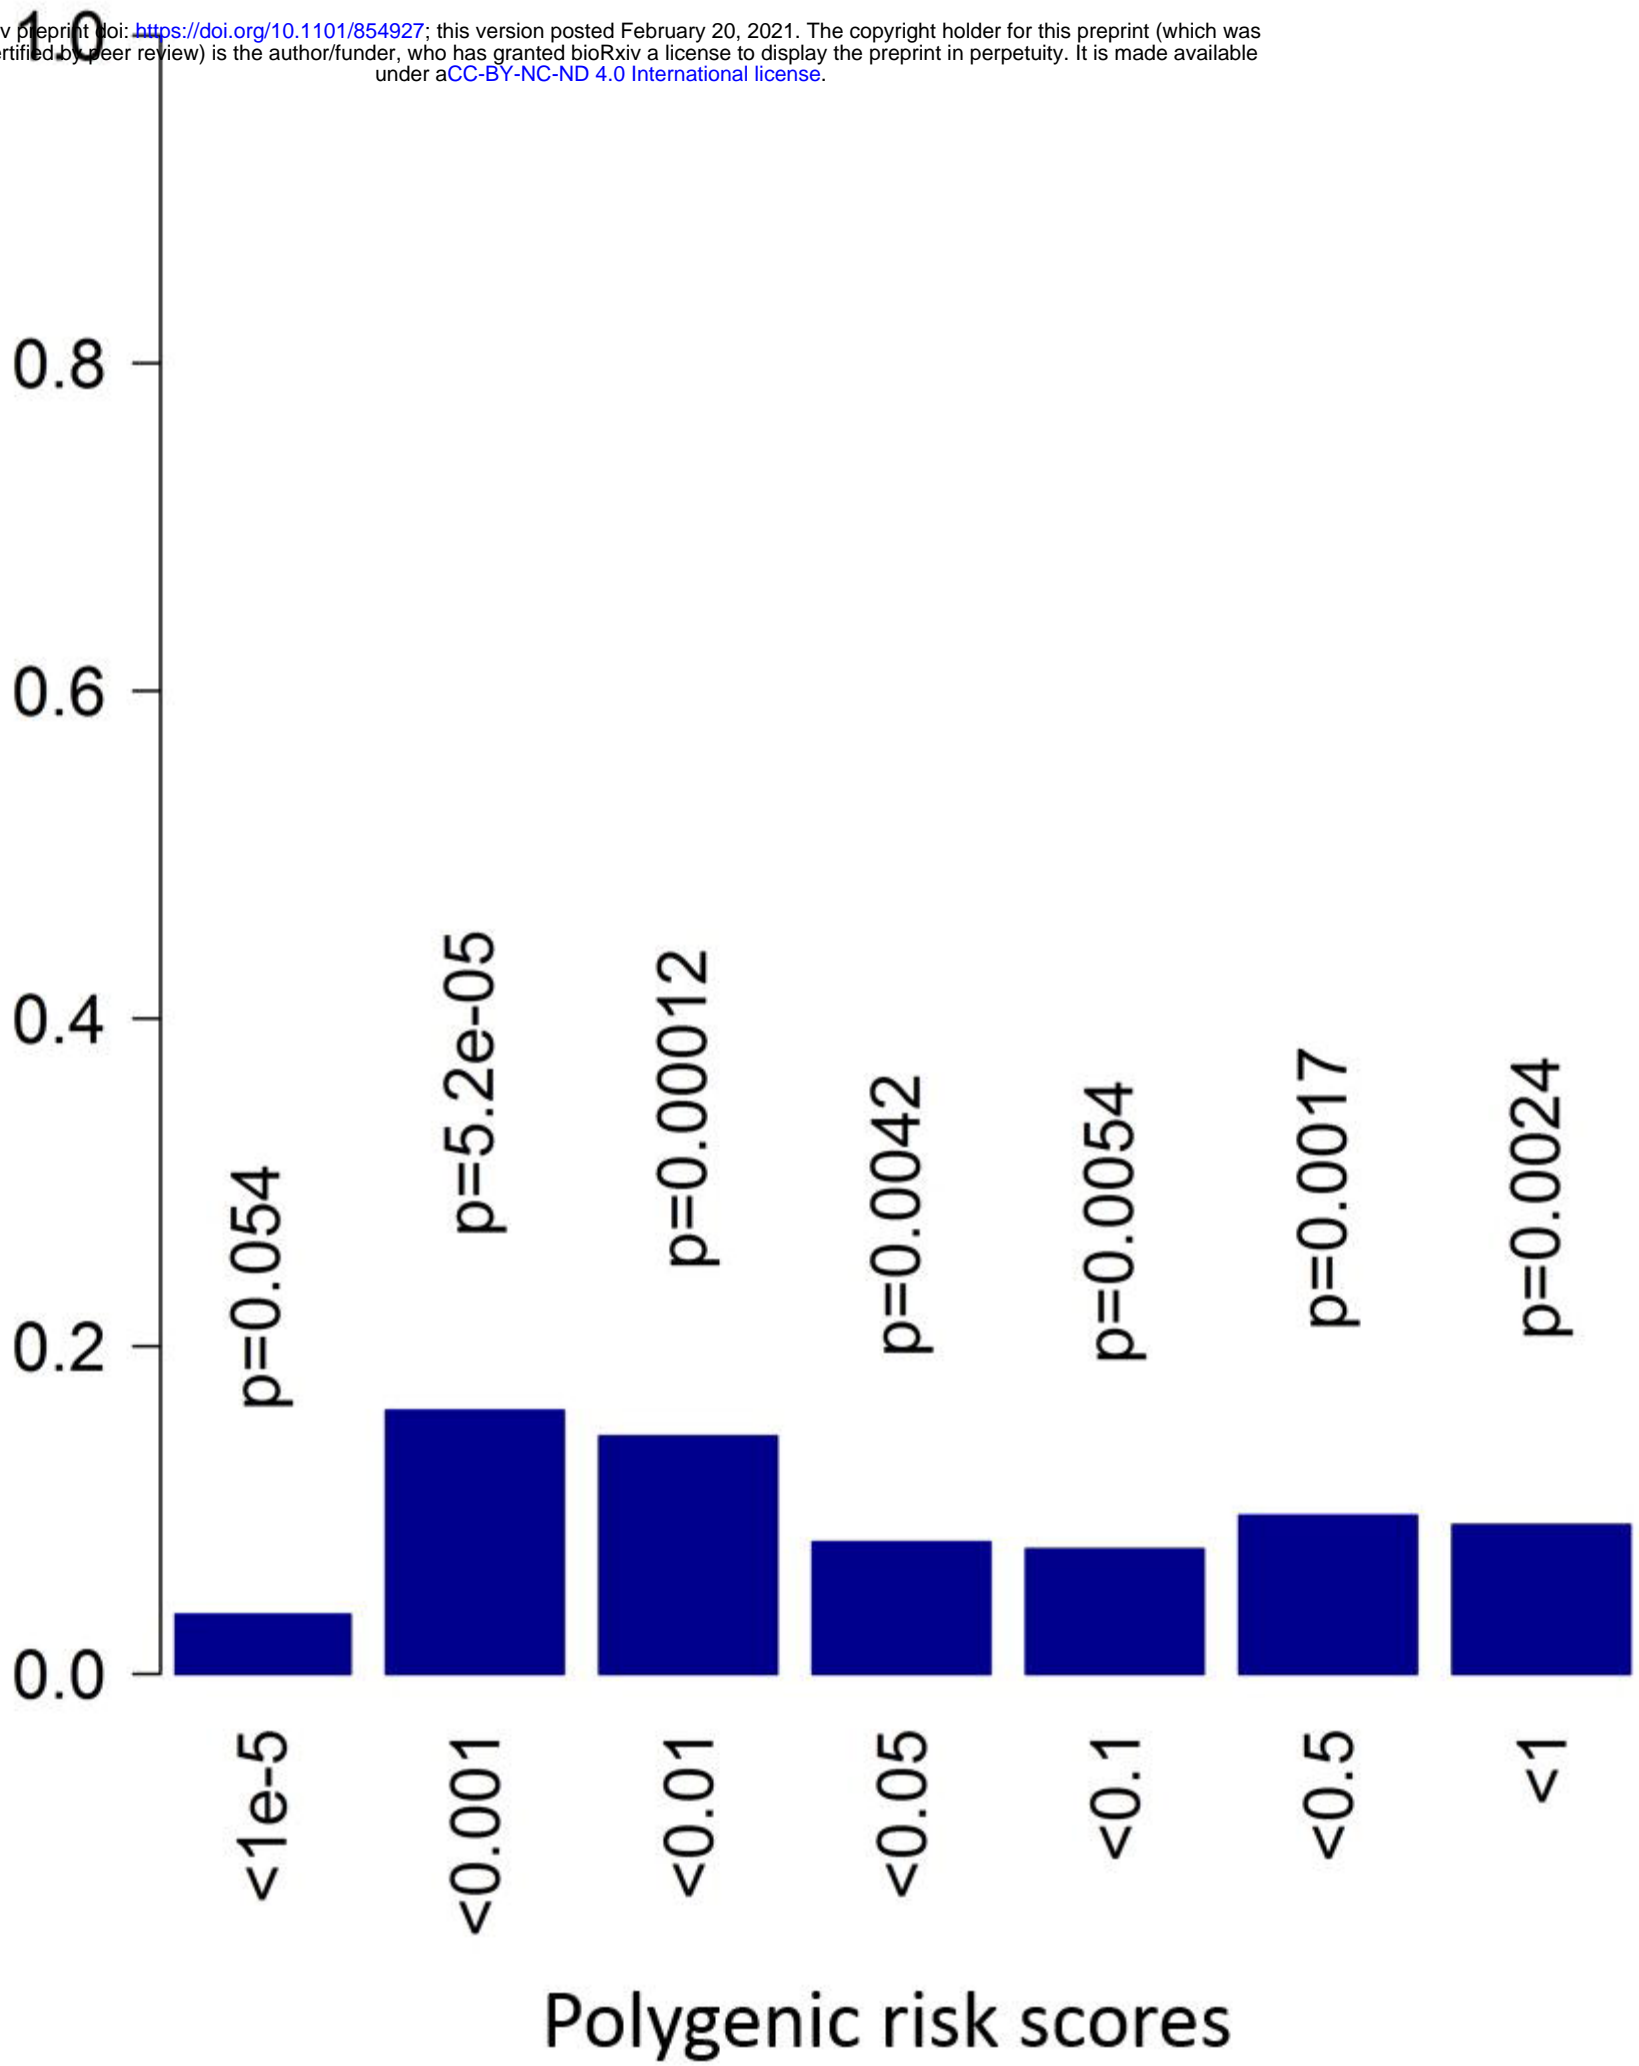



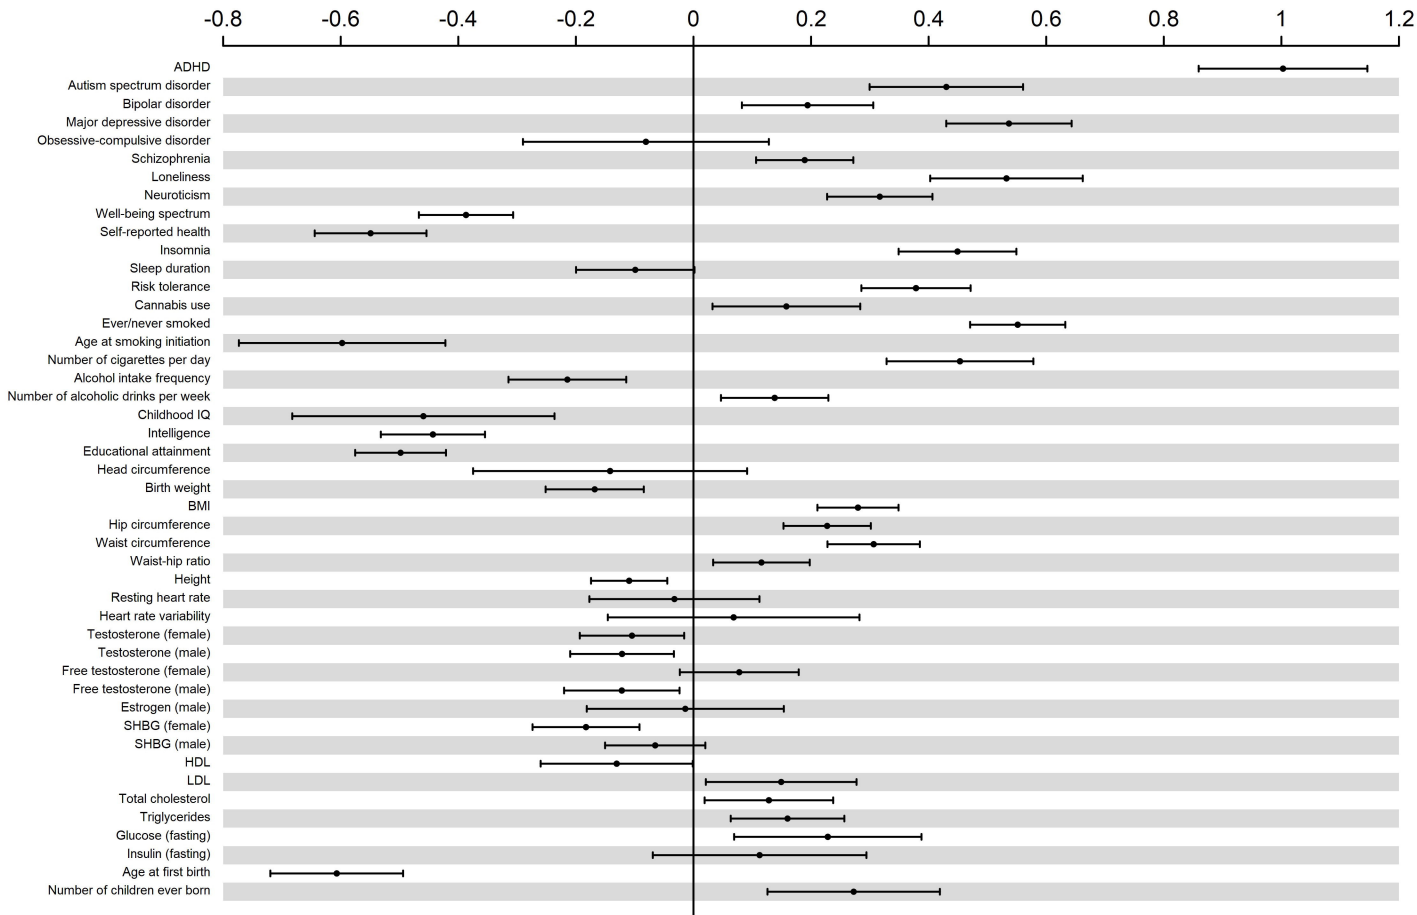

Source: http://biorxiv.org/content/10.1101/854927v3.full.pdf
