1 Genetic Association Study of Childhood Aggression across raters,  
2 instruments and age

3

4 Authors & Addresses:

5 Ip, Hill F.<sup>1</sup>, van der Laan, Camiel M.<sup>1,114</sup>, Brikell, Isabell<sup>3</sup>, Sánchez-Mora, Cristina<sup>4,5,6</sup>, Nolte, Ilja M.<sup>7</sup>, St  
6 Pourcain, Beate<sup>8,9,10</sup>, Bolhuis, Koen<sup>11</sup>, Palviainen, Teemu<sup>12</sup>, Zafarmand, Hadi<sup>13,14</sup>, Colodro-Conde,  
7 Lucía<sup>15</sup>, Gordon, Scott<sup>15</sup>, Zayats, Tetyana<sup>16,17,18</sup>, Aliev, Fazil<sup>19</sup>, Jiang, Chang<sup>21,22</sup>, Wang, Carol A.<sup>23</sup>,  
8 Saunders, Gretchen<sup>24</sup>, Karhunen, Ville<sup>25</sup>, Hammerschlag, Anke R.<sup>26,1,27</sup>, Adkins, Daniel E.<sup>28,29</sup>, Border,  
9 Richard<sup>30,31,32</sup>, Peterson, Roseann E.<sup>33</sup>, Prinz, Joseph A.<sup>34</sup>, Thiering, Elisabeth<sup>35,36</sup>, Seppälä, Ilkka<sup>37</sup>,  
10 Vilor-Tejedor, Natàlia<sup>38-42</sup>, Ahluwalia, Tarunveer S.<sup>43,44</sup>, Day, Felix R.<sup>45</sup>, Hottenga, Jouke-Jan<sup>1</sup>, Allegrini,  
11 Andrea<sup>2</sup>, Krapohl, Eva M. L.<sup>2</sup>, Rimfeld, Kaili<sup>2</sup>, Chen, Qi<sup>3</sup>, Lu, Yi<sup>3</sup>, Martin, Joanna<sup>3,46</sup>, Soler Artigas,  
12 María<sup>4,5,6</sup>, Rovira, Paula<sup>4,5,6</sup>, Bosch, Rosa<sup>4,5,47</sup>, Español, Gemma<sup>4</sup>, Ramos Quiroga, Josep Antoni<sup>4,5,47,6</sup>,  
13 Neumann, Alexander<sup>11,48</sup>, Ensink, Judith<sup>49,50</sup>, Grasby, Katrina<sup>15</sup>, Morosoli, José J.<sup>15</sup>, Tong, Xiaoran<sup>21,22</sup>,  
14 Marrington, Shelby<sup>51</sup>, Middeldorp, Christel<sup>26,1,52</sup>, Scott, James G.<sup>51,53,54</sup>, Vinkhuyzen, Anna<sup>55</sup>, Shabalin,  
15 Andrey A.<sup>29</sup>, Corley, Robin<sup>30,56</sup>, Evans, Luke M.<sup>30,56</sup>, Sugden, Karen<sup>57,34</sup>, Alemany, Silvia<sup>38-40</sup>, Sass,  
16 Lærke<sup>43</sup>, Vinding, Rebecca<sup>43</sup>, Ruth, Kate<sup>58</sup>, Tyrrell, Jess<sup>58</sup>, Davies, Gareth E.<sup>59</sup>, Ehli, Erik A.<sup>59</sup>,  
17 Hagenbeek, Fiona A.<sup>1</sup>, De Zeeuw, Eveline<sup>1</sup>, Van Beijsterveldt, Toos C.E.M.<sup>1</sup>, Larsson, Henrik<sup>3,110</sup>,  
18 Snieder, Harold<sup>7</sup>, Verhulst, Frank C.<sup>11,60</sup>, Amin, Najaf<sup>61</sup>, Whipp, Alyce M.<sup>12</sup>, Korhonen, Tellervo<sup>12</sup>,  
19 Vuoksimaa, Eero<sup>12</sup>, Rose, Richard J.<sup>64</sup>, Uitterlinden, André G.<sup>61,65,66</sup>, Heath, Andrew C.<sup>67</sup>, Madden,  
20 Pamela<sup>67</sup>, Haavik, Jan<sup>16,20</sup>, Harris, Jennifer R.<sup>68</sup>, Helgeland, Øyvind<sup>69</sup>, Johansson, Stefan<sup>16,70</sup>, Knudsen,  
21 Gun Peggy S.<sup>68</sup>, Njolstad, Pal Rasmus<sup>71</sup>, Lu, Qing<sup>21,22</sup>, Rodriguez, Alina<sup>25,72</sup>, Henders, Anjali K.<sup>55</sup>,  
22 Mamun, Abdullah<sup>73</sup>, Najman, Jakob M.<sup>51</sup>, Brown, Sandy<sup>74</sup>, Hopfer, Christian<sup>75</sup>, Krauter, Kenneth<sup>76</sup>,  
23 Reynolds, Chandra<sup>77</sup>, Smolen, Andrew<sup>30</sup>, Stallings, Michael<sup>30,31</sup>, Wadsworth, Sally<sup>30</sup>, Wall, Tamara<sup>74</sup>,  
24 Silberg, Judy L.<sup>78,33</sup>, Miller, Allison<sup>79</sup>, Keltikangas-Järvinen, Liisa<sup>80</sup>, Christian Hakulinen<sup>80</sup>, Pulkki-Råback,  
25 Laura<sup>80</sup>, Alexandra Havdahl<sup>103,104</sup>, Per Magnus<sup>113</sup>, Raitakari, Olli T.<sup>81-83</sup>, Perry, John R.B.<sup>45</sup>, Llop,  
26 Sabrina<sup>84,85</sup>, Lopez-Espinosa, Maria-Jose<sup>84,85,86</sup>, Bønnelykke, Klaus<sup>43</sup>, Bisgaard, Hans<sup>43</sup>, Sunyer, Jordi<sup>38-</sup>  
27 <sup>40,87</sup>, Lehtimäki, Terho<sup>37</sup>, Arseneault, Louise<sup>2</sup>, Standl, Marie<sup>35</sup>, Heinrich, Joachim<sup>35,88,89</sup>, Boden,  
28 Joseph<sup>90</sup>, Pearson, John<sup>91</sup>, Horwood, John<sup>90</sup>, Kennedy, Martin<sup>92</sup>, Poulton, Richie<sup>93</sup>, Eaves, Lindon J.<sup>78,33</sup>,  
29 Maes, Hermine H.<sup>78,33,94</sup>, Hewitt, John<sup>30,31</sup>, Copeland, William E.<sup>95</sup>, Costello, Elizabeth J.<sup>96</sup>, Williams,  
30 Gail M.<sup>51</sup>, Wray, Naomi<sup>55,97</sup>, Järvelin, Marjo-Riitta<sup>25,98</sup>, McGue, Matt<sup>24</sup>, Iacono, William<sup>24</sup>, Caspi,  
31 Avshalom<sup>57,99,100,34</sup>, Moffitt, Terrie E.<sup>57,99,100,34</sup>, Whitehouse, Andrew<sup>101</sup>, Pennell, Craig E.<sup>23</sup>, Klump,  
32 Kelly L.<sup>102</sup>, Burt, S. Alexandra<sup>102</sup>, Dick, Danielle M.<sup>19,62,63</sup>, Reichborn-Kjennerud, Ted<sup>104,105</sup>, Martin,  
33 Nicholas G.<sup>15</sup>, Medland, Sarah E.<sup>15</sup>, Vrijkkotte, Tanja<sup>13</sup>, Kaprio, Jaakko<sup>106,12</sup>, Tiemeier, Henning<sup>11,107</sup>,  
34 Davey Smith, George<sup>8,108</sup>, Hartman, Catharina A.<sup>109</sup>, Oldehinkel, Albertine J.<sup>109</sup>, Casas, Miquel<sup>4,5,47,6</sup>,  
35 Ribasés, Marta<sup>4,5,6</sup>, Lichtenstein, Paul<sup>3</sup>, Lundström, Sebastian<sup>111,112</sup>, Plomin, Robert<sup>2</sup>, Bartels,  
36 Meike<sup>1,27,\*</sup>, Nivard, Michel G.<sup>1,\*</sup>, Boomsma, Dorret I.<sup>1,27,\*</sup>

37

38 <sup>1</sup> Department of Biological Psychology, Vrije Universiteit Amsterdam, Amsterdam, The Netherlands

39 <sup>2</sup> Institute of Psychiatry, Psychology and Neuroscience, King's College London, United Kingdom

40 <sup>3</sup> Department of Medical Epidemiology and Biostatistics, Karolinska Institutet, Stockholm, Sweden

- 41 <sup>4</sup> Department of Psychiatry, Hospital Universitari Vall d'Hebron, Barcelona, Spain
- 42 <sup>5</sup> Biomedical Network Research Centre on Mental Health (CIBERSAM), Instituto de Salud Carlos III,  
43 Barcelona, Spain
- 44 <sup>6</sup> Psychiatric Genetics Unit, Group of Psychiatry, Mental Health and Addiction, Vall d'Hebron  
45 Research Institute (VHIR), Universitat Autònoma de Barcelona, Barcelona, Spain
- 46 <sup>7</sup> Department of Epidemiology, University of Groningen, University Medical Center Groningen,  
47 Groningen, The Netherlands
- 48 <sup>8</sup> MRC Integrative Epidemiology Unit, University of Bristol, Bristol, UK
- 49 <sup>9</sup> Max Planck Institute for Psycholinguistics, The Netherlands
- 50 <sup>10</sup> Donders Institute for Brain, Cognition and Behaviour, Radboud University, The Netherlands
- 51 <sup>11</sup> Department of Child and Adolescent Psychiatry/Psychology, Erasmus University Medical Center,  
52 Rotterdam, Netherlands
- 53 <sup>12</sup> Institute for Molecular Medicine FIMM, HiLife, University of Helsinki, Helsinki, Finland
- 54 <sup>13</sup> Department of Public Health, Amsterdam Public Health Research Institute, Amsterdam UMC,  
55 location Academic Medical Center, University of Amsterdam, Amsterdam, The Netherlands
- 56 <sup>14</sup> Department of Clinical Epidemiology, Biostatistics and Bioinformatics, Amsterdam Public Health  
57 Research Institute, Amsterdam UMC, location Academic Medical Center, University of Amsterdam,  
58 Amsterdam, The Netherlands
- 59 <sup>15</sup> QIMR Berghofer Medical Research Institute, Brisbane, Australia
- 60 <sup>16</sup> Department of Biomedicine, University of Bergen, Norway
- 61 <sup>17</sup> Analytic and Translational Genetics Unit, Department of Medicine, Massachusetts General Hospital  
62 and Harvard Medical School, Boston, Massachusetts, USA
- 63 <sup>18</sup> Stanley Center for Psychiatric Research, Broad Institute of MIT and Harvard, Cambridge,  
64 Massachusetts, USA
- 65 <sup>19</sup> Department of Psychology, Virginia Commonwealth University, USA
- 66 <sup>20</sup> Division of Psychiatry, Haukeland University Hospital, Norway
- 67 <sup>21</sup> Department of Epidemiology and Biostatistics, Michigan State University, East Lansing, USA
- 68 <sup>22</sup> Department of Biostatistics, University of Florida, Gainesville, USA
- 69 <sup>23</sup> School of Medicine and Public Health, Faculty of Medicine and Health, The University of Newcastle
- 70 <sup>24</sup> Department of Psychology, University of Minnesota, USA
- 71 <sup>25</sup> Department of Epidemiology and Biostatistics, MRC-PHE Centre for Environment and Health,  
72 School of Public Health, Imperial College London, London, W2 1PG, United Kingdom
- 73 <sup>26</sup> Child Health Research Centre, the University of Queensland, Brisbane, QLD, Australia
- 74 <sup>27</sup> Amsterdam Public Health Research Institute, Amsterdam, The Netherlands
- 75 <sup>28</sup> Department of Sociology, College of Social and Behavioral Science, University of Utah
- 76 <sup>29</sup> Department of Psychiatry, School of Medicine, University of Utah
- 77 <sup>30</sup> Institute for Behavioral Genetics, University of Colorado Boulder, Colorado, USA
- 78 <sup>31</sup> Department of Psychology and Neuroscience, University of Colorado Boulder, Colorado, USA
- 79 <sup>32</sup> Department of Applied Mathematics, University of Colorado Boulder, Colorado, USA
- 80 <sup>33</sup> Department of Psychiatry, Virginia Institute for Psychiatric and Behavioral Genetics, Virginia  
81 Commonwealth University
- 82 <sup>34</sup> Center for Genomic and Computational Biology, Duke University, Durham, NC, USA
- 83 <sup>35</sup> Institute of Epidemiology, Helmholtz Zentrum München - German Research Center for  
84 Environmental Health, Neuherberg, Germany

- 85 <sup>36</sup> Ludwig-Maximilians-University of Munich, Dr. von Hauner Children's Hospital, Division of  
86 Metabolic Diseases and Nutritional Medicine, Munich, Germany
- 87 <sup>37</sup> Department of Clinical Chemistry, Fimlab Laboratories, and Finnish Cardiovascular Research Center  
88 - Tampere, Faculty of Medicine and Health Technology, Tampere University, Tampere 33520, Finland
- 89 <sup>38</sup> ISGlobal, Barcelona Institute for Global Health, Barcelona, Spain
- 90 <sup>39</sup> Universitat Pompeu Fabra (UPF), Barcelona, Spain
- 91 <sup>40</sup> CIBER Epidemiología y Salud Pública (CIBERESP), Spain
- 92 <sup>41</sup> Centre for Genomic Regulation (CRG), The Barcelona Institute of Science and Technology,  
93 Barcelona, Spain
- 94 <sup>42</sup> BarcelonaBeta Brain Research Center, Pasqual Maragall Foundation (FPM), Barcelona, Spain
- 95 <sup>43</sup> COPSAC, Copenhagen Prospective Studies on Asthma in Childhood, Herlev and Gentofte Hospital,  
96 University of Copenhagen, Copenhagen, Denmark
- 97 <sup>44</sup> Steno Diabetes Center Copenhagen, Gentofte, Denmark
- 98 <sup>45</sup> MRC Epidemiology Unit, University of Cambridge School of Clinical Medicine, Institute of  
99 Metabolic Science, Cambridge Biomedical Campus, Cambridge, UK
- 100 <sup>46</sup> MRC Centre for Neuropsychiatric Genetics and Genomics, Division of Psychological Medicine and  
101 Clinical Neurosciences, Cardiff University, Cardiff, UK
- 102 <sup>47</sup> Department of Psychiatry and Legal Medicine, Universitat Autònoma de Barcelona, Barcelona,  
103 Spain
- 104 <sup>48</sup> Lady Davis Institute for Medical Research, Jewish General Hospital, Montreal, Qc, Canada
- 105 <sup>49</sup> Department of Child and Adolescent Psychiatry, Academic Medical Center, Amsterdam, The  
106 Netherlands
- 107 <sup>50</sup> De Bascule, Academic centre for Child and Adolescent Psychiatry, Amsterdam, The Netherlands
- 108 <sup>51</sup> School of Public Health, Faculty of Medicine, The University of Queensland, Herston 4006,  
109 Australia
- 110 <sup>52</sup> Children's Health Queensland Hospital and Health Service, Child and Youth Mental Health Service,  
111 Brisbane, QLD, Australia
- 112 <sup>53</sup> Metro North Mental Health, University of Queensland, QLD, Australia
- 113 <sup>54</sup> Queensland Centre for Mental Health Research, QLD, Australia
- 114 <sup>55</sup> Institute for Molecular Bioscience, University of Queensland, QLD, Australia
- 115 <sup>56</sup> Department of Ecology and Evolutionary Biology, University of Colorado Boulder, Colorado, USA
- 116 <sup>57</sup> Department of Psychology and Neuroscience and Center for Genomic and Computational Biology,  
117 Duke University, Durham, NC, USA
- 118 <sup>58</sup> Genetics of Complex Traits, University of Exeter Medical School, Royal Devon & Exeter Hospital,  
119 Exeter, EX2 5DW, UK
- 120 <sup>59</sup> Avera Institute for Human Genetics, Sioux Falls, South Dakota, USA
- 121 <sup>60</sup> Child and Adolescent Mental Health Centre, Mental Health Services Capital Region, Research Unit,  
122 Copenhagen University Hospital, Copenhagen, Denmark
- 123 <sup>61</sup> Department of Epidemiology, Erasmus University Medical Center, Rotterdam, The Netherlands
- 124 <sup>62</sup> Department of Human and Molecular Genetics, Virginia Commonwealth University, Richmond, VA,  
125 USA
- 126 <sup>63</sup> College Behavioral and Emotional Health Institute, Virginia Commonwealth University, Richmond,  
127 VA, USA
- 128 <sup>64</sup> Department of Psychological and Brain Sciences, Indiana University, Bloomington, IN, USA
- 129 <sup>65</sup> Department of Internal Medicine, Erasmus University Medical Center, Rotterdam, The Netherlands

- 130 <sup>66</sup> Netherlands Genomics Initiative (NGI)-sponsored Netherlands Consortium for Healthy Aging  
131 (NCHA), Leiden, The Netherlands
- 132 <sup>67</sup> Washington University, St Louis MO, USA
- 133 <sup>68</sup> Division of Health Data and Digitalisation, The Norwegian Institute of Public Health, Oslo, Norway
- 134 <sup>69</sup> Department of Genetics and Bioinformatics, Division of Health Data and Digitalization, The  
135 Norwegian Institute of Public Health
- 136 <sup>70</sup> K.G. Jebsen Centre for Neuropsychiatric Disorders, Department of Clinical Science, University of  
137 Bergen, Norway
- 138 <sup>71</sup> Department of Clinical Science, University of Bergen, Norway
- 139 <sup>72</sup> School of Psychology, University of Lincoln, Lincolnshire, LN5 7AY, United Kingdom
- 140 <sup>73</sup> Institute for Social Science Research, University of Queensland, Long Pocket 4068, Australia
- 141 <sup>74</sup> Department of Psychiatry, University of California, San Diego
- 142 <sup>75</sup> University of Colorado School of Medicine, Aurora, Colorado, USA
- 143 <sup>76</sup> Department of Molecular, Cellular, and Developmental Biology, University of Colorado Boulder,  
144 USA
- 145 <sup>77</sup> Department of Psychology, University of California Riverside, Riverside, CA, USA
- 146 <sup>78</sup> Department of Human & Molecular Genetics, Virginia Institute for Psychiatric and Behavioral  
147 Genetics, Virginia Commonwealth University
- 148 <sup>79</sup> Department of Pathology and Biomedical Science, and Carney Centre for Pharmacogenomics,  
149 University of Otago Christchurch, New Zealand
- 150 <sup>80</sup> Department of Psychology and Logopedics, Faculty of Medicine, University of Helsinki, Finland
- 151 <sup>81</sup> Centre for Population Health Research, University of Turku and Turku University Hospital
- 152 <sup>82</sup> Research Centre of Applied and Preventive Cardiovascular Medicine, University of Turku
- 153 <sup>83</sup> Department of Clinical Physiology and Nuclear Medicine, Turku University Hospital, Turku, Finland
- 154 <sup>84</sup> Epidemiology and Environmental Health Joint Research Unit, FISABIO-Universitat Jaume I-  
155 Universitat de València, Valencia, Spain
- 156 <sup>85</sup> Spanish Consortium for Research on Epidemiology and Public Health (CIBERESP), Madrid, Spain
- 157 <sup>86</sup> Faculty of Nursing and Chiropody, Universitat de València, Valencia, Spain
- 158 <sup>87</sup> IMIM (Hospital del Mar Medical Research Institute), Barcelona, Spain
- 159 <sup>88</sup> Institute and Outpatient Clinic for Occupational, Social and Environmental Medicine, University of  
160 Munich Medical Center, Ludwig-Maximilians-Universität München, Munich, Germany
- 161 <sup>89</sup> Allergy and Lung Health Unit, Melbourne School of Population and Global Health, University of  
162 Melbourne, Melbourne, Australia
- 163 <sup>90</sup> Christchurch Health and Development Study, Department of Psychological Medicine, University of  
164 Otago Christchurch, New Zealand
- 165 <sup>91</sup> Biostatistics and Computational Biology Unit, Department of Pathology and Biomedical Science,  
166 University of Otago Christchurch, New Zealand
- 167 <sup>92</sup> Department of Pathology and Biomedical Science, and Carney Centre for Pharmacogenomics,  
168 University of Otago Christchurch, New Zealand
- 169 <sup>93</sup> Dunedin Multidisciplinary Health and Development Research Unit, University of Otago, Dunedin,  
170 New Zealand
- 171 <sup>94</sup> Massey Cancer Center, Virginia Commonwealth University
- 172 <sup>95</sup> Department of Psychiatry, College of Medicine, University of Vermont
- 173 <sup>96</sup> Department of Psychiatry, School of Medicine, Duke University

174 <sup>97</sup> Queensland Brain Institute, Institute for Molecular Bioscience, University of Queensland, St Lucia  
175 4072, Australia  
176 <sup>98</sup> Center for Life Course Health Research, Faculty of Medicine, University of Oulu, PO Box 8000, FI-  
177 90014 Oulun yliopisto, Finland  
178 <sup>99</sup> Department of Psychiatry and Behavioral Sciences, Duke University School of Medicine, Durham,  
179 NC, USA  
180 <sup>100</sup> Social, Genetic, and Developmental Psychiatry Research Centre, Institute of Psychiatry,  
181 Psychology, and Neuroscience, King's College London, UK  
182 <sup>101</sup> Telethon Kids Institute, The University of Western Australia, Perth, Western Australia, Australia  
183 <sup>102</sup> Department of Psychology, Michigan State University, East Lansing, USA  
184 <sup>103</sup> Nic Waals Institute, Lovisenberg Diaconal Hospital, Oslo, Norway  
185 <sup>104</sup> Department of Mental Disorders, Norwegian Institute of Public Health, Oslo, Norway  
186 <sup>105</sup> Institute of Clinical Medicine, University of Oslo, Oslo, Norway  
187 <sup>106</sup> Department of Public Health, Medical Faculty, University of Helsinki, Helsinki, Finland  
188 <sup>107</sup> Department of Social and Behavioral Science, Harvard TH Chan School of Public Health, Boston,  
189 USA  
190 <sup>108</sup> Population Health Sciences, Bristol Medical School, University of Bristol, Bristol, UK  
191 <sup>109</sup> Department of Psychiatry, University of Groningen, University Medical Center Groningen,  
192 Groningen, The Netherlands  
193 <sup>110</sup> School of Medical Sciences, Orebro University, Orebro, Sweden  
194 <sup>111</sup> Gillberg Neuropsychiatry Centre, University of Gothenburg, Gothenburg, Sweden  
195 <sup>112</sup> Sweden Centre for Ethics, Law and Mental Health, University of Gothenburg, Gothenburg,  
196 Sweden  
197 <sup>113</sup> Centre for Fertility and Health, Norwegian Institute of Public Health, Oslo, Norway  
198 <sup>114</sup> Netherlands Institute for the Study of Crime and Law Enforcement  
199 \* These authors jointly supervised this work  
200

201 Corresponding authors: M Bartels ([m.bartels@vu.nl](mailto:m.bartels@vu.nl)), MG Nivard ([m.g.nivard@vu.nl](mailto:m.g.nivard@vu.nl)), DI Boomsma  
202 ([di.boomsma@vu.nl](mailto:di.boomsma@vu.nl))

203

204

205 **Abstract**

206 Childhood aggressive behavior (AGG) has a substantial heritability, with limited success in genome-  
207 wide association studies. Here we present a genome-wide association meta-analysis (GWAMA) of  
208 childhood AGG, in which all phenotype measures across age from multiple assessors were included.  
209 We analyzed phenotype assessments for a total of 328 935 observations from 87 485 children aged  
210 between 1.5 and 18 years, while accounting for sample overlap. We also meta-analyzed within  
211 subsets of the data – i.e. within rater, instrument and age. SNP-heritability for the overall meta-  
212 analysis (AGG<sub>overall</sub>) was 3.31% (SE=0.0038). We found no genome-wide significant SNPs for AGG<sub>overall</sub>.  
213 The gene-based analysis returned three significant genes: *ST3GAL3* ( $P=1.6E-06$ ), *PCDH7* ( $P=2.0E-06$ )  
214 and *IPO13* ( $P=2.5E-06$ ). All three genes have previously been associated with educational traits.  
215 Polygenic scores based on our GWAMA significantly predicted aggression in a holdout sample of  
216 children (variance explained = 0.44%) and in retrospectively assessed childhood aggression (variance  
217 explained = 0.20%). Genetic correlations ( $r_g$ ) among rater-specific assessment of AGG ranged from  
218  $r_g=0.46$  between self- and teacher-assessment to  $r_g=0.81$  between mother- and teacher-assessment.  
219 We obtained moderate to strong  $r_g$ 's with selected phenotypes from multiple domains, but hardly  
220 with any of the classical biomarkers thought to be associated with AGG. Significant genetic  
221 correlations were observed with most psychiatric and psychological traits (range  $|r_g|$ : 0.19 – 1.00),  
222 except for obsessive-compulsive disorder. Aggression had a negative genetic correlation ( $r_g \approx -0.5$ )  
223 with cognitive traits and age at first birth. Aggression was strongly genetically correlated with  
224 smoking phenotypes (range  $|r_g|$ : 0.46 – 0.60). The genetic correlations between aggression and  
225 psychiatric disorders were weaker for teacher-reported AGG than for mother- and self-reported  
226 AGG. The current GWAMA of childhood aggression provides a powerful tool to interrogate the rater  
227 specific genetic etiology of AGG.

228

229

## 230 **Introduction**

231 There is a variety of phenotypic definitions of aggressive behavior (AGG), from broadly defined  
232 externalizing problems to narrow definitions like chronic physical aggression [1]. Generally any action  
233 performed with the intention to harm another organism can be viewed as AGG [2, 3]. AGG is  
234 considered a common human behavior [4], with people varying in the degree of AGG they exhibit [5].  
235 Children typically display AGG early in life, after which symptoms tend to diminish [6, 7], although in  
236 some individuals AGG persists into adulthood [8]. AGG is also part of numerous childhood and adult  
237 disorders [9], including oppositional defiant disorder (ODD) and conduct disorder (CD)[10]. In its  
238 extreme forms, AGG may be considered a disorder by itself – inflicting a huge personal and financial  
239 burden on the individual, their relatives, friends, and society as a whole [11]. In general population  
240 studies, AGG is commonly treated as a quantitative trait, and pathological AGG has been argued to be  
241 best seen as the extreme end of such a continuum [12–14]. Childhood AGG co-occurs with many other  
242 behavioral, emotional, and social problems [15, 16] and is associated with increased risk of developing  
243 negative outcomes later in life, including cannabis abuse [17], criminal convictions [18], anxiety  
244 disorder [19], or antisocial personality disorder [20]. Not all associated outcomes are harmful [21]. For  
245 example, children who learn to control their impulses and apply aggressive acts as a well-timed  
246 coercion strategy are generally more liked by their peers and score higher on social dominance [22].

247 Despite a heritability of roughly 50% [5, 23], genome-wide association studies (GWASs) on  
248 AGG have not identified genome-wide significant loci that replicated [1]. Childhood cohorts often have  
249 rich longitudinal data and assessments from multiple informants and we aimed to increase power to  
250 detect genomic loci via multivariate genome-wide association meta-analysis (GWAMA) across  
251 genetically correlated traits [24, 25]. In AGG, twin studies have reported moderate to high genetic  
252 correlations among instruments, raters, and age [26–29]. Childhood behavior can be context  
253 dependent, with teachers, fathers, and mothers each observing and rating aggression against a  
254 different background. Teachers are typically unrelated to the child, and see the child in the context of  
255 a structured classroom and can judge the child’s behavior against that of other pupils. Parents share

256 part of their genome with their offspring and, most often, a household. Parental genomes also  
257 influence the home environment, and it is predominantly within this context that parents observe the  
258 child's behavior. Multiple assessments of aggression by teachers, fathers, and mothers, by different  
259 instruments and at different ages, provides information that may be unique to a specific context and  
260 therefore may capture context-dependent expression of AGG. These considerations support an  
261 approach in which all AGG data are simultaneously analyzed, while retaining the ability to analyze the  
262 data by rater. Our analyses include repeated observations on the same subject, which requires  
263 appropriate modeling of the clustered data, since the covariance between test statistics becomes a  
264 function of a true shared genetic signal and the phenotypic correlation among outcomes [29]. We  
265 developed an approach that allowed inclusion of all measures for a child – e.g. from multiple raters at  
266 multiple ages – and resolved issues of sample overlap at the level of the meta-analysis. By doing so we  
267 make full use of all data and maximize statistical power for gene discovery. At the same time, by  
268 aggregating data at the level of the meta-analysis we retain the flexibility to estimate  $r_g$ 's between  
269 AGG at different ages, by different raters and instruments, and test how AGG assessed by multiple  
270 raters differ in the  $r_g$  with other phenotypes.

271 Data on AGG from parent-, teacher- and self-report in boys and girls were collected in 29  
272 cohorts from Europe, USA, Australia, and New-Zealand with 328 935 observations from 87 485  
273 participants, aged 1.5 to 18 years. First, we combined all data to produce the largest GWAMA on  
274 childhood AGG to date. SNP-based association tests were followed up by gene-based analyses. We  
275 computed polygenic scores (PGSs) to test the out-of-sample prediction of AGG to explore the  
276 usefulness of our GWAMA in future research [30]. To assess genetic pleiotropy between AGG and  
277 associated traits, we estimated  $r_g$ 's with a preselected set of external phenotypes from multiple  
278 domains – with a focus on psychiatric and psychological traits, cognition, anthropometric and  
279 reproductive traits, substance use, and classic biomarkers of AGG, including testosterone levels.  
280 Second, meta-analyses were done by rater, instrument, and age. We estimated  $r_g$ 's across these



281 assessments of AGG. To identify context-specific genetic overlap with the external phenotypes,  $r_g$ 's  
282 were also estimated between rater-specific assessments of AGG and the external phenotypes.

283

## 284 **Methodology**

### 285 **Data description**

286 Extended description of the cohorts and phenotypes is supplied in the Supplemental Text and  
287 Supplementary Tables 1-9. Cohorts with assessment of AGG in genotyped children and adolescents  
288 took part in the meta-analysis. AGG was assessed on continuous scales, with higher scores indicating  
289 higher levels of AGG. Within cohort, samples were stratified by (1) rater, (2) instrument and (3) age,  
290 maintaining at least 450 observations in each stratum. We ran a univariate GWAS for each stratum  
291 within each cohort (Supplementary Table 8). To account for dependence within cohort in the meta-  
292 analysis (see Supplementary Text), each cohort supplied the phenotypic covariance matrix between  
293 the AGG measures (Supplementary Table 10) and the degree of sample overlap (Supplementary  
294 Table 11) between the different strata. Supplementary Figure 1 shows the distribution of phenotypic  
295 correlations across all AGG measures. We assumed no sample overlap across cohorts, and  
296 phenotypic correlations among cohorts were set to zero and omitted from Supplementary Figure 1.  
297 Phenotypic correlations of zero also correspond to independent samples within a cohort. For GWASs  
298 with sample overlap, most phenotypic correlations ranged between 0.1 and 0.4, with a median value  
299 of 0.29. When stratified by rater, phenotypic correlations were more heavily centered around 0.4  
300 (see Supplementary Figure 1). The maximum number of correlations within cohort at a specific age is  
301 three based on four raters, with the largest number of observations within age-bin around age 12  
302 years. Within this age group, phenotypic correlations among raters ranged between 0.22 and 0.65,  
303 with a median of 0.34. The lowest phenotypic correlations were seen between teachers and parents.  
304 Since limited data were available on individuals of non-European ancestry, we restricted analyses to  
305 individuals of European ancestry.

306 In total, 29 cohorts contributed 163 GWASs, based on 328 935 observations from 87 485  
307 unique individuals (Supplementary Table 2). Children were 1.5 to 18 years old at assessment, or  
308 retrospectively assessed at these ages. Cohorts supplied between 1 and 26 univariate GWASs.  
309 Approximately 50% of the subjects were males. Most GWASs were based on maternal- (52.4%) and  
310 self-assessment (25.1%), with the remainder based on teacher (12.4%) and paternal report (10.1%).  
311 After QC, applied to the univariate GWASs, between 3.47M SNPs and 7.28M SNPs were retained for  
312 meta-analysis (see Supplementary Figure 2 and Supplementary Table 9).

313

#### 314 **Meta-analysis**

315 Within cohort measures of AGG may be dependent due to including repeated measures of AGG over  
316 age and measures from multiple raters. To account for the effect of sample overlap, we applied a  
317 modified version of the multivariate meta-analysis approach developed by Baselmans *et al* [25] (see  
318 Table 1). Instead of estimating the dependence among GWASs based on the cross-trait-intercept  
319 (CTI) with linkage disequilibrium score regression (LDSC)[29, 31], the expected pairwise CTI value  
320 was calculated (Table 1) using the observed sample overlap and phenotypic covariance. The  
321 effective sample size ( $N_{\text{eff}}$ ) was approximated by the third formula in Table 1. When there is no  
322 sample overlap (or a phenotypic correlation equal to zero) between all GWASs (i.e. CTI is an identity  
323 matrix),  $N_{\text{eff}}$  is equal to the sum of sample sizes.

324 First, we meta-analyzed all available GWASs ( $AGG_{\text{overall}}$ ). Second, we meta-analyzed all  
325 available data within rater (rater-specific GWAMAs). Third, rater-specific age-bins were created for  
326 mother- and self-reported AGG based on the mean ages of the subjects in each GWAS (age-specific  
327 GWAMA). To ensure that the age-specific GWAMAs would have sufficient power for subsequent  
328 analyses, age-bins were created such that the total *univariate* number of observations ( $N_{\text{obs}}$ )  
329 exceeded 15 000 (see Supplementary Text and Supplementary Table 12). For father- and teacher-  
330 reported AGG there were insufficient data to run age-specific GWAMAs. Fourth, we performed

331 instrument-specific GWAMAs for (1) the ASEBA scales and (2) for the SDQ, because for these two  
332 instruments the total *univariate*  $N_{\text{obs}}$  was over 15 000.

333 SNPs that had  $\text{MAF} < 0.01$ ,  $N_{\text{eff}} < 15\,000$ , or were observed in less than two cohorts were  
334 removed from further analyses. SNP-heritabilities ( $h_{\text{SNP}}^2$ ) were estimated using LDSC [31].  $r_g$ 's were  
335 calculated across stratified assessments of AGG using LDSC [29]. To ensure sufficient power for the  
336 genetic correlations,  $r_g$  was calculated across stratified assessments of AGG if the Z-score of the  
337  $h_{\text{SNP}}^2$  for the corresponding GWAMA was 4 or higher [29].

338

### 339 **Gene-based tests**

340 For  $\text{AGG}_{\text{overall}}$ , a gene-based analysis was done in MAGMA [32]. The gene-based test combines *P*-  
341 values from multiple SNPs to obtain a test statistic for each gene, while accounting for LD between  
342 the SNPs. From the MAGMA website (see URLs) we obtained (1) a list of 18 087 genes and their  
343 start- and end-positions, and (2) pre-formatted European genotypes from 1 000 Genomes phase 3  
344 for the reference LD. We applied a Bonferroni correction for multiple testing at  $\alpha = 0.05/18\,087$ . A  
345 lookup for significant results was performed in GWAS Catalog and PhenoScanner (see URLs).

346

### 347 **Polygenic Scores**

348 All data were meta-analyzed twice more, once omitting all data from the Netherlands Twin Register  
349 (NTR) and once omitting the Australian data from the Queensland Institute for Medical Research  
350 (QIMR,) and the Mater-University of Queensland Study of Pregnancy (MUSP). As the NTR target  
351 sample we considered mother-reported AGG at age 7 ( $N = 4\,491$ ), which represents the largest NTR  
352 univariate stratum. In the QIRM participants, we tested whether our childhood AGG PGS predicted  
353 adult retrospective assessment of their own CD behavior during adolescence ( $N = 10\,706$ ). We  
354 allowed for cohort-specific best practice in the polygenic score analysis. In the NTR, we created 16  
355 sets of PGSs in PLINK1.9 [33], with *P*-value thresholds between 1 and  $1.0\text{E-}05$  (see Supplementary  
356 Table 13). The remaining SNPs were clumped in PLINK. We applied an  $r^2$ -threshold of 0.5 and

357 minimum clumping distance of 250 000 base pair positions [33]. Age,  $age^2$ , sex, first five ancestry-  
358 based principal components, a SNP-array variable, and interaction terms between sex and age, and  
359 sex and  $age^2$  were defined as fixed effects. To account for relatedness, prediction was performed  
360 using generalized equation estimation (GEE) as implemented in the “gee” package (version 4.13-19)  
361 in R (version 3.5.3). GEE applies a sandwich correction over the standard errors to account for  
362 clustering in the data [34]. To correct for multiple testing, we applied an FDR correction at  $\alpha=0.05$  for  
363 16 tests. QIMR excluded SNPs with low imputation quality ( $r^2 = 0.6$ ) and MAF below 1% and selected  
364 the most significant independent SNPs using PLINK1.9 [35] (criteria linkage disequilibrium  $r^2 = 0.1$   
365 within windows of 10 MBp). We calculated different PGS for seven P-value thresholds ( $p < 1e-5$ ,  $p$   
366  $< 0.001$ ,  $p < 0.01$ ,  $p < 0.05$ ,  $p < 0.1$ ,  $p < 0.5$ , and  $p < 1.0$ ) of the GWAS summary statistics. PGS were  
367 calculated from the imputed genotype dosages to the 1 000 Genomes (Phase 3 Release 5) reference  
368 panel. We fitted linear mixed models, which controlled for relatedness using a Genetic Relatedness  
369 Matrix (GRM) and covariates sex, age, two dummy variables for the GWAS array used, and the first  
370 five genetic principal components. The parameters of the model were estimated using GCTA 1.9 [36]  
371 The linear model was as follows:

$$CD\ symtom\ score = intercept + Covariates * b + c * PGS + G$$

372 where  $b$  and  $c$  represent the vectors of fixed effects; and  $G \sim N(0, GRM * \sigma^2 G)$  represents the  
373 random effect that models the sample relatedness, with  $GRM$  being the  $N$  by  $N$  matrix of  
374 relatedness estimated from SNPs and  $N=10\,706$  is the number of individuals.

375

### 376 **Genetic correlations with external phenotypes**

377 We computed  $r_g$ 's between  $AGG_{overall}$  and a set of preselected outcomes ( $N=46$ ; collectively referred  
378 to as “external phenotypes”; Supplementary Table 14). Phenotypes were selected based on  
379 established hypotheses with AGG and the availability of sufficiently powered GWAS summary  
380 statistics. We restricted  $r_g$ 's to phenotypes for which the Z-scores of the LDSC-based  $h_{SNP}^2 \geq 4$  [29].  
381 Next, we estimated  $r_g$ 's for all rater-specific assessments of AGG (except for father-reported AGG).

382 Genomic Structural Equation Modelling (Genomic SEM)[37] was applied to test if  $r_g$ 's were  
383 significantly different across raters. Specifically, for every phenotype, we tested whether (1) all three  
384  $r_g$ 's between the external phenotype and rater-specific assessment of AGG, i.e. mother, teacher or  
385 self-ratings, could be constrained at zero, and (2) whether  $r_g$ 's could be constrained to be equal  
386 across raters. A  $\chi^2$  difference test was applied to assess whether imposing the constraints resulted  
387 in a significant worse model fit compared to a model where the  $r_g$ 's between the phenotype and  
388 three rater-specific assessment of AGG were allowed to differ. We applied an FDR correction at  
389  $\alpha=0.05$  over two models for 46 external phenotypes, for a total of 92 tests. An FDR correction for 4 x  
390 46=184 tests was applied to correct for multiple testing of whether the genetic correlations were  
391 significantly different from zero.

392

## 393 **Results**

### 394 **Overall GWAMA**

395 We first meta-analyzed the effect of each SNP across all available univariate GWASs. Assuming an  
396  $N_{\text{eff}}$  of 151 741, the  $h^2_{SNP}$  of  $AGG_{\text{overall}}$  was estimated at 3.31% (SE=0.0038). The mean  $\chi^2$ -statistic was  
397 1.12 along with an LDSC-intercept of 1.02 (SE=0.01). This indicated that a small, but significant, part  
398 of the inflation in test statistics might have been due to confounding biases, which can either reflect  
399 population stratification or subtle misspecification of sample overlap within cohorts. No genome-  
400 wide significant hits were found for  $AGG_{\text{overall}}$  (Figure 1). The list of suggestive associations ( $P<1.0E-05$ )  
401 is provided in Supplementary Table 15. SNPs were annotated with SNPnexus (see URLs). The  
402 strongest association, in terms of significance, was located on chromosome 2 (rs2570485;  $P=2.0E-$   
403 07). The SNP is located inside a gene desert, without any gene in 400Kbp in any direction. The  
404 second strongest independent association was found with rs113599846 ( $P=4.3E-07$ ), which is  
405 located inside an intronic region of *TNRC18* on chromosome 7. None of the suggestive associations  
406 have previously been reported for AGG or AGG-related traits [1].

407 We tested previously reported genome-wide significant associations for AGG [1] and  
408 performed a lookup in  $AGG_{overall}$ . We restricted lookup to associations with autosomal SNPs that  
409 were found in samples of European ancestry, resulting in three loci. One genome-wide significant hit  
410 was reported for adult antisocial personality disorder ( $rs4714329$ ;  $OR=0.63^1$ ;  $P=1.64E-09$ )[38]. The  
411 same SNP, however, had an opposite direction of effect in  $AGG_{overall}$  ( $\beta=0.0022$ ;  $P=0.41$ ). Tielbeek *et*  
412 *al* [39] reported two genome-wide significant hits for antisocial behavior, one on chromosome 1  
413 ( $rs2764450$ ) and one on chromosome 11 ( $rs11215217$ ). While both SNPs have the same direction of  
414 effect, neither SNP is associated with  $AGG_{overall}$  (both  $P>0.5$ ).

415

#### 416 **Gene-based analysis**

417 After correction for multiple testing, the gene-based analysis returned three significant results  
418 (Supplementary Table 16): *ST3GAL3* (ST3 beta-galactoside alpha-2,3-sialyltransferase3;  $P=1.6E-06$ ),  
419 *PCDH7* (protocadherin 7;  $P=2.0E-06$ ) and *IPO13* (importin 13;  $P=2.5E-06$ ). *ST3GAL3* codes for a type II  
420 membrane protein that is involved in catalyzing the transfer of sialic acid from CMP-sialic acid to  
421 galactose-containing substrates. *ST3GAL3* has been implicated in 107 GWASs, most notably on  
422 intelligence and educational attainment. The top SNP in *ST3GAL3* ( $rs2485997$ ;  $P=2.48E-06$ ) is in  
423 strong LD ( $r^2>0.8$ ) with several other SNPs inside the gene body of *ST3GAL3* and in moderate LD  
424 ( $r^2>0.6$ ) with SNPs in several neighboring genes (Supplementary Figure 3). *PCDH7* codes for a protein  
425 that is hypothesized to function in cell-cell recognition and adhesion. *PCDH7* has been implicated in  
426 196 previous GWASs, for example educational attainment and adventurousness. The top SNP for  
427 *PCDH7* ( $rs13138213$ ;  $P=1.44E-06$ ) is in strong LD ( $r^2>0.8$ ) with a small number of other closely located  
428 SNPs and the signal for the gene-based test appears to be driven by two independent loci  
429 (Supplementary Figure 4). *IPO13* codes for a nuclear transport protein. *IPO13* has been implicated in  
430 the UKB GWASs on whether a person holds a college or university degree and intelligence. The top

---

<sup>1</sup> odds ratio was signed to the other allele in the original study

431 SNP (rs3791116;  $P=1.19E-05$ ) is in moderate to strong LD with multiple SNPs (Supplementary Figure  
432 5), including SNPs in the neighboring *ST3GAL3* gene.

433

#### 434 **Polygenic prediction**

435 In children, 11 out of 16 polygenic scores were significantly correlated with mother-reported AGG in  
436 7-year-olds (Figure 2A) after correction for multiple testing. The scores explained between 0.036%  
437 and 0.44% of the phenotypic variance. The significant correlations consistently emerged when  
438 scores including SNPs with P-values above 0.002 in the discovery GWAS were considered. In the  
439 retrospective assessments of adolescent CD, the PGS calculated at various thresholds (Figure 2B)  
440 explained up to 0.2% of the variance in symptom sum scores. Generally, CD is significantly predicted  
441 at most thresholds, although, as we would expect based on the SNP-heritability of  $AGG_{overall}$ , the  
442 proportion of explained variance is small.

443

#### 444 **Genetic correlation with external phenotypes**

445 Genetic correlations between  $AGG_{overall}$  and a set of preselected external phenotypes are shown in  
446 Figure 3 and Supplementary Table 17. These phenotypes can broadly be grouped into psychiatric  
447 and psychological traits, substance use, cognitive ability, anthropometric traits, classic biomarkers of  
448 AGG, reproductive traits, and sleeping behavior. We included childhood phenotypes (e.g. birth  
449 weight and childhood IQ) and disorders (e.g. ADHD and autism spectrum disorder [ASD]), but the  
450 majority of phenotypes were adult characteristics or characteristics measured in adult samples.  
451 After correction for multiple testing, 36 phenotypes showed a significant  $r_g$  with  $AGG_{overall}$  ( $P<0.02$ ).  
452 In general, the highest positive correlations were seen with psychiatric traits, notably ADHD, ASD,  
453 and major depressive disorder (MDD). The largest negative genetic correlations were found for age  
454 at smoking initiation, childhood IQ, and age at first birth. Based on the biomarker-aggression  
455 literature, we tested for the presence of genetic correlations between  $AGG_{overall}$  and lipids, heart rate,  
456 heart rate variability, and testosterone levels. Very low genetic correlations were observed for

457 AGG<sub>overall</sub>, and these biomarkers, with in many cases the sign of the genetic correlation opposite to  
458 what was expected based on the literature on biomarkers of AGG.

459

#### 460 **Stratified assessment of childhood aggressive behavior**

461 Separate meta-analyses were carried out for raters, instruments and age. None of these GWAMAs  
462 returned genome-wide significant hits. Manhattan plots for the four rater-specific GWAMAs are  
463 shown in Supplementary Figure 6. Estimates of  $h_{SNP}^2$  for rater-specific assessment of AGG are shown  
464 in Supplementary Table 18. The lowest  $h_{SNP}^2$  was observed for father-reported AGG ( $h_{SNP}^2=0.04$ ;  
465 SE=0.03) and the highest for teacher-reported AGG ( $h_{SNP}^2=0.08$ ; SE=0.02). We estimated  $r_g$  between  
466 rater-specific assessment of AGG, except for father-reported AGG, which returned a non-significant  
467  $h_{SNP}^2$ . Genetic correlations were 0.67 between AGG<sub>Mother</sub> and AGG<sub>Self</sub> (SE=0.10), and 0.81 between  
468 AGG<sub>Mother</sub> and AGG<sub>Teacher</sub> (SE=0.11), and in both cases significantly lower than 1. A moderate  $r_g$  was  
469 estimated between AGG<sub>Self</sub> and AGG<sub>Teacher</sub> ( $r_g=0.46$ ; SE=0.13).

470 We performed a GWAMA across all GWASs where an ASEBA scale was used (AGG<sub>ASEBA</sub>) and  
471 another GWAMA across all GWASs for the SDQ (AGG<sub>SDQ</sub>). SNP-heritabilities for AGG<sub>ASEBA</sub> and AGG<sub>SDQ</sub>  
472 were 0.031 (SE=0.0099) and 0.026 (SE=0.0086), respectively. The GWAMAs were insufficiently  
473 powered to estimate  $r_g$  across instrument-specific assessment of AGG.

474 Age-specific GWAMAs were performed for mother- and self-reported AGG, which made up  
475 77.5% of the data. Mother-reported data were split into seven age-bins and self-reported data into  
476 three (Supplementary Table 12). Estimates of the  $h_{SNP}^2$  for each age-specific GWAMA can be found  
477 in Supplementary Table 19. For mother-reported AGG,  $h_{SNP}^2$  ranged between 0.012 and 0.078. For  
478 self-reported AGG, the highest  $h_{SNP}^2$  was seen for the retrospective data ( $h_{SNP}^2=0.12$ ; SE=0.03), which  
479 also showed a significantly inflated intercept (1.05; SE=0.01).  $r_g$  could only be estimated between  
480 AGG<sub>M7</sub>, AGG<sub>S13</sub> and AGG<sub>SR</sub> (Supplementary Table 20).

481

#### 482 **Genetic correlation between rater-specific assessment of AGG and external phenotypes**



483 We estimated rater-specific  $r_g$ 's with the external phenotypes, except for father-reported AGG, and  
484 tested if these  $r_g$ 's could be constrained to be equal across mothers, teachers and self-ratings. For  
485 ADHD, ASD, MDD, schizophrenia, well-being, and self-reported health, constraining the  $r_g$ 's to be  
486 equal across rater resulted in significantly worse model fit (Supplementary Table 21). For all these  
487 phenotypes,  $r_g$ 's with teacher-reported AGG were consistently lower compared to mother- and self-  
488 reported AGG (Supplementary Figure 7 and Supplementary Table 17). For lifetime cannabis use,  
489 genetic correlations also could not be constrained to be equal across raters. Here, a relatively strong  
490  $r_g$  was found with self-reported AGG ( $r_g=0.36$ ; SE=0.08) compared to teacher- ( $r_g=0.13$ ; SE=0.07) and  
491 mother-reported AGG ( $r_g=0.08$ ; SE=0.08).

492

## 493 Discussion

494 We present the largest genome-wide association meta-analysis (GWAMA) of childhood aggressive  
495 behavior (AGG) to date. The gene-based analysis implicated three genes, *PCDH7*, *ST3GAL3* and *IPO13*,  
496 based on the overall meta-analysis (AGG<sub>overall</sub>), which did not return genome-wide significant SNPs.  
497 Lead SNPs in the implicated genes were related to educational outcomes, but did not reach genome-  
498 wide significance and these loci require further evidence before being considered as AGG risk  
499 variants. Polygenic scores (PGS) predicted childhood AGG and retrospectively assessed adolescent  
500 CD. Stratified analyses within AGG generally returned moderate to strong genetic correlations across  
501 raters. We found substantial genetic correlations between AGG<sub>overall</sub> and a list of preselected external  
502 phenotypes from various domains, including, psychiatry and psychology, cognition, anthropometric  
503 and reproductive traits. Most notably was the perfect  $r_g$  between AGG<sub>overall</sub> and ADHD ( $r_g=1.00$ ;  
504 SE=0.07). This is in line with the moderate-to-strong phenotypic correlations that have consistently  
505 been found across sex-, rater-, age- and instrument-specific assessment of AGG with attention  
506 problems and hyperactivity [15]. Significant genetic correlations were further observed with other  
507 psychiatric and psychological traits (range  $|r_g|$ : 0.19 – 0.55). Negative genetic correlations ( $r_g \sim -0.5$ )  
508 were found with all three traits from the cognitive domain. Genetic correlations were positive with

509 smoking initiation ( $r_g=0.55$ ;  $SE=0.04$ ) and smoking quantity ( $r_g=0.46$ ;  $SE=0.06$ ), and negative with age  
510 at smoking initiation ( $r_g=-0.60$ ;  $SE=0.09$ ).

511 We examined genetic correlations with classical biomarkers of aggressive behavior. Higher  
512 levels of aggression have been associated with lower levels of LDL [40] and lower resting heart rate  
513 [41, 42]. We found a positive, albeit weak,  $r_g$  between  $AGG_{overall}$  and LDL ( $r_g=0.15$ ;  $SE=0.07$ ), which  
514 has an opposite sign than what was expected based on the literature [39]. More broadly, except for  
515 HDL ( $r_g=-0.13$ ;  $SE=0.07$ ), all measures of lipid levels returned significant positive  $r_g$ 's with  $AGG_{overall}$ ,  
516 albeit weakly ( $r_g<0.2$ ). No heart rate measure showed a significant genetic correlation with  $AGG_{overall}$ .  
517 The relationship between testosterone levels and (childhood) AGG in the literature is, at best,  
518 unclear. A positive association between AGG and testosterone is often assumed, but the relation  
519 may be more complex [43]. Both positive and negative phenotypic correlations have been found and  
520 seem context-dependent [44]. We found significant negative,  $r_g$ 's between  $AGG_{overall}$  and  
521 testosterone levels in males and females ( $|r_g|<0.15$ ). These should be interpreted with some caution  
522 because of the design of the GWA studies: AGG was measured in children and young adolescents  
523 whereas testosterone levels were measured in adults in the UK Biobank [45], and genetic stability of  
524 testosterone levels might be low, at least for males [46]. Genetic correlations with reproductive  
525 traits showed a positive relation with having more children ( $r_g=0.27$ ;  $SE=0.08$ ) and having offspring  
526 earlier in life ( $r_g=-0.60$ ;  $SE=0.06$ ), tending to confirm that not all associated outcomes are harmful.

527 The stratified design of our study also allowed for examination of the genetic etiology of  
528 AGG in subsets of the data and examination of genetic correlations among raters. The  $r_g$  between  
529  $AGG_{Mother}$  and  $AGG_{Teacher}$  ( $r_g=0.81$ ;  $SE=0.11$ ) was high, but less than unity, and is in line with previous  
530 findings of rater-specific additive genetic effects in childhood AGG [47]. Most external phenotypes  
531 showed comparable  $r_g$ 's with mother-, self-, and teacher-reported AGG. For ADHD, ASD, MDD,  
532 schizophrenia, well-being, and self-reported health,  $r_g$ 's differed significantly across raters. Weaker  
533  $r_g$ 's were consistently found in teacher-reported AGG compared to mother- and self-reported AGG.  
534 These findings indicate the presence of rater-specific effects when considering the genetic

535 correlation of AGG with other outcomes.  $r_g$ 's are generally stronger in the psychopathology and  
536 psychological domains. A lack of power, however, seems insufficient to explain why we found  
537 weaker  $r_g$ 's between  $AGG_{Teacher}$  and phenotypes from these two domains. Other phenotypes, like  
538 smoking behavior, educational attainment or age at first birth, are, like psychopathological  
539 phenotypes, highly genetically correlated with  $AGG_{overall}$ , but, unlike psychopathologies, have near  
540 identical  $r_g$ 's across raters. The rater-specific effects on  $r_g$ 's between childhood AGG and external  
541 phenotypes might be limited to psychopathologies, and future research into the genetics of  
542 childhood psychopathology might consider these nuances in effects of assessment of childhood AGG  
543 from various sources, be that multiple raters, instruments, and ages.

544         Despite the considerable sample sizes, we were still underpowered to compute genetic  
545 correlations with external phenotypes while stratifying AGG over age or instrument. Age-stratified  
546 GWASs in larger samples across development are a desirable target for future research. Because  
547 genetic correlations can be computed between phenotypes for which a well-powered GWAS is  
548 available, age-stratified GWAS of many developmental phenotypes, behavioral, cognitive and  
549 neuroscientific can be leveraged to better understand development of childhood traits.

550         We note that multivariate results should be interpreted with some caution. While combining  
551 data from correlated traits can indeed improve power to identify genome-wide associations,  
552 interpreting the phenotype may not be straightforward. In the current GWAMA, we have referred to  
553 our phenotype as “aggressive behavior” and interpreted the results accordingly. Aggressive behavior,  
554 however, is an umbrella term that has been used to identify a wide range of distinct – though  
555 correlated – traits and behaviors [1].

556         Genome-wide association studies are increasingly successful in identifying genomic loci for  
557 complex human traits [48] and also in psychiatry, genetic biomarkers are increasingly thought of as  
558 promising for both research and treatment. Genetic risk prediction holds promise for adult  
559 psychiatric disorders [30] and it seems reasonable to expect the same for childhood disorders. Here  
560 we found that polygenic scores explain up to 0.44% of the phenotypic variance in AGG in 7-year-olds

561 and 0.2% of the variance in retrospectively reported adolescent CD. Future studies may explore the  
562 utility of these PGSs in illuminating pleiotropy between  $AGG_{overall}$  and other traits. A limiting factor in  
563 this regard is the relatively low SNP-heritability, which puts an upper bound on the predictive  
564 accuracy of PGSs. Since measurement error suppresses SNP-heritability, better measurement may  
565 offer an avenue to higher powered GWAS, and subsequently to better PGS. Furthermore, sample  
566 sizes for developmental phenotypes, including AGG may need to increase by one to two orders of  
567 magnitude before PGS become useful for individual patients.

568         Despite our extensive effort, the first genome-wide significant SNP for childhood AGG has  
569 yet to be found. Even in the absence of genome-wide significant loci, however, GWASs aid in  
570 clarifying the biology behind complex traits. Our results show that, even without genome-wide  
571 significant hits, a GWAS can be powerful enough to illuminate the genetic etiology of a trait in the  
572 form of  $r_g$ 's with other complex traits. Non-significant associations are expected to capture part of  
573 the polygenicity of a trait [31] and various follow up-analyses have been developed for GWASs that  
574 do not require, but are aided by, genome-wide significant hits [49]. Polygenic scores aggregate SNP  
575 effects into a weighted sum that indicates a person's genetic liability to develop a disorder. While  
576 their clinical application is still limited in psychiatric disorders, they can already aid in understanding  
577 the pleiotropy among psychiatric and other traits [30]. Similarly, summary statistics-based genetic  
578 correlations ( $r_g$ ) provide insight into the genetic overlap between complex traits [29, 50].

579

580 **URLs**

581 MAGMA: <https://ctg.cncr.nl/software/magma>

582 SNPnexus: <https://www.snp-nexus.org/index.html> (accessed on 28-8-2019)

583 GWAS Catalog: <https://www.ebi.ac.uk/gwas/> (accessed on 29-8-2019)

584 PhenoScanner: <http://www.phenoscaner.medschl.cam.ac.uk/> (accessed on 29-8-2019)

585

586 **Acknowledgements**

587 We very warmly thank all participants, their parents and teachers for making this study possible. The  
588 project was supported by the “Aggression in Children: Unraveling gene-environment interplay to  
589 inform Treatment and InterventiON strategies” project (ACTION). ACTION received funding from the  
590 European Union Seventh Framework Program (FP7/2007-2013) under grant agreement no 602768.  
591 Cohort specific acknowledgements and funding information may be found in Supplemental Text.

592

593 **Author contributions** may be found in Supplemental Text

594

595 **Conflict of interests**

596 Miquel Casas has received travel grants and research support from Eli Lilly and Co., Janssen-Cilag,  
597 Shire and Lundbeck and served as consultant for Eli Lilly and Co., Janssen-Cilag, Shire and Lundbeck.  
598 Josep Antoni Ramos Quiroga was on the speakers’ bureau and/or acted as consultant Eli-Lilly,  
599 Janssen-Cilag, Novartis, Shire, Lundbeck, Almirall, Braingaze, Sincrolab, Medicine, Exeltis and Rubió  
600 in the last 5 years. He also received travel awards (air tickets + hotel) for taking part in psychiatric  
601 meetings from Janssen-Cilag, Rubió, Shire, Medice and Eli-Lilly. The Department of Psychiatry  
602 chaired by him received unrestricted educational and research support from the following  
603 companies in the last 5 years: Eli-Lilly, Lundbeck, Janssen-Cilag, Actelion, Shire, Ferrer, Oryzon, Roche,  
604 Psious, and Rubió.

605

606 **References**

- 607 1. Odintsova V V, Ip HF, Pool R, Van der Laan CM, Boomsma DI, Roetman PJ, et al. Genomics of  
608 human aggression: current state of genome-wide studies and an automated systematic  
609 review tool. *Psychiatr Genet.* 2019;29:170–190.
- 610 2. Baron RA, Richardson DR. *Human Aggression.* 2nd ed. New York; 1994.
- 611 3. Anderson CA, Bushman BJ. Human aggression. *Annu Rev Psychol.* 2002;53:27–51.
- 612 4. Veroude K, Zhang-James Y, Fernández-Castillo N, Bakker MJ, Cormand B, Faraone S V.  
613 Genetics of aggressive behavior: An overview. *Am J Med Genet Part B Neuropsychiatr Genet.*  
614 2016;171:3–43.
- 615 5. Tuvblad C, Baker LA. Human aggression across the lifespan: genetic propensities and  
616 environmental moderators. *Adv Genet.* 2011;75:171–214.
- 617 6. Bongers IL, Koot HM, van der Ende J, Verhulst FC. Developmental Trajectories of Externalizing  
618 Behaviors in Childhood and Adolescence. *Child Dev.* 2004;75:1523–1537.
- 619 7. Tremblay RE, Vitaro F, Côté SM. Developmental Origins of Chronic Physical Aggression: A Bio-  
620 Psycho-Social Model for the Next Generation of Preventive Interventions. *Annu Rev Psychol.*  
621 2018;69:383–407.
- 622 8. Huesmann LR, Dubow EF, Boxer P. Continuity of aggression from childhood to early  
623 adulthood as a predictor of life outcomes: Implications for the adolescent-limited and life-  
624 course-persistent models. *Aggress Behav.* 2009;35:136–149.
- 625 9. Zhang-James Y, Faraone S V. Genetic architecture for human aggression: A study of gene-  
626 phenotype relationship in OMIM. *Am J Med Genet Part B Neuropsychiatr Genet.*  
627 2016;171:641–649.
- 628 10. American Psychiatric Association. *Diagnostic and Statistical Manual of Mental Disorders, Fifth*  
629 *Edition.* Arlington: American Psychiatric Association; 2013.
- 630 11. Foster EM, Jones DE, The Conduct Problems Prevention Research Group. The high costs of  
631 aggression: public expenditures resulting from conduct disorder. *Am J Public Health.*

- 632 2005;95:1767–1772.
- 633 12. Walton KE, Ormel J, Krueger RF. The dimensional nature of externalizing behaviors in  
634 adolescence: Evidence from a direct comparison of categorical, dimensional, and hybrid  
635 models. *J Abnorm Child Psychol*. 2011;39:553–561.
- 636 13. Walters GD, Ruscio J. Trajectories of youthful antisocial behavior: Categories or continua? *J*  
637 *Abnorm Child Psychol*. 2013;41:653–666.
- 638 14. Barry TD, Marcus DK, Barry CT, Coccaro EF. The latent structure of oppositional defiant  
639 disorder in children and adults. *J Psychiatr Res*. 2013;47:1932–1939.
- 640 15. Bartels M, Hendriks A, Mauri M, Krapohl E, Whipp A, Bolhuis K, et al. Childhood aggression  
641 and the co-occurrence of behavioural and emotional problems: results across ages 3–  
642 16 years from multiple raters in six cohorts in the EU-ACTION project. *Eur Child Adolesc*  
643 *Psychiatry*. 2018;27:1105–1121.
- 644 16. Whipp AM, Vuoksima E, Bolhuis K, de Zeeuw EL, Korhonen T, Mauri M, et al. Teacher-rated  
645 aggression and co-occurring problems and behaviors among schoolchildren: A comparison of  
646 four population-based European cohorts. *MedRxiv*. 2019:19002576.
- 647 17. Heron J, Barker ED, Joinson C, Lewis G, Hickman M, Munafò M, et al. Childhood conduct  
648 disorder trajectories, prior risk factors and cannabis use at age 16: birth cohort study.  
649 *Addiction*. 2013;108:2129–2138.
- 650 18. Rivenbark JG, Odgers CL, Caspi A, Harrington H, Hogan S, Houts RM, et al. The high societal  
651 costs of childhood conduct problems: evidence from administrative records up to age 38 in a  
652 longitudinal birth cohort. *J Child Psychol Psychiatry*. 2018;59:703–710.
- 653 19. Odgers CL, Moffitt TE, Broadbent JM, Dickson N, Hancox RJ, Harrington H, et al. Female and  
654 male antisocial trajectories: From childhood origins to adult outcomes. *Dev Psychopathol*.  
655 2008;20:673–716.
- 656 20. Whipp AM, Korhonen T, Raevuori A, Heikkilä K, Pulkkinen L, Rose RJ, et al. Early adolescent  
657 aggression predicts antisocial personality disorder in young adults: a population-based study.

- 658 Eur Child Adolesc Psychiatry. 2019;28:341–350.
- 659 21. Hawley PH, Little TD, Rodkin PC. Aggression and adaptaion: The bright side to bad behavior.  
660 1st ed. New York: Routledge; 2007.
- 661 22. Hawley PH. Social Dominance in Childhood and Adolescence: Why Social Competence and  
662 Aggression May Go Hand in Hand. In: Hawley PH, Little TD, Rodkin PC, editors. Aggress. Adapt.  
663 Bright Side to Bad Behav., . 1st ed. New York: Routledge; 2007. p. 1–22.
- 664 23. Waltes R, Chiocchetti AG, Freitag CM. The neurobiological basis of human aggression: A  
665 review on genetic and epigenetic mechanisms. Am J Med Genet Part B Neuropsychiatr Genet.  
666 2016;171:650–675.
- 667 24. Turley P, Walters RK, Maghzian O, Okbay A, Lee JJ, Fontana MA, et al. Multi-trait analysis of  
668 genome-wide association summary statistics using MTAG. Nat Genet. 2018;50:229–237.
- 669 25. Baselmans BML, Jansen R, Ip HF, van Dongen J, Abdellaoui A, van de Weijer MP, et al.  
670 Multivariate genome-wide analyses of the well-being spectrum. Nat Genet. 2019;51:445–451.
- 671 26. van Beijsterveldt CEM, Bartels M, Hudziak JJ, Boomsma DI. Causes of Stability of Aggression  
672 from Early Childhood to Adolescence: A Longitudinal Genetic Analysis in Dutch Twins. Behav  
673 Genet. 2003;33:591–605.
- 674 27. Porsch RM, Middeldorp CM, Cherny SS, Krapohl E, van Beijsterveldt CEM, Loukola A, et al.  
675 Longitudinal heritability of childhood aggression. Am J Med Genet Part B Neuropsychiatr  
676 Genet. 2016;171:697–707.
- 677 28. Lubke GH, McArtor DB, Boomsma DI, Bartels M. Genetic and environmental contributions to  
678 the development of childhood aggression. Dev Psychol. 2018;54:39–50.
- 679 29. Bulik-Sullivan B, Finucane HK, Anttila V, Gusev A, Day FR, Loh P-R, et al. An atlas of genetic  
680 correlations across human diseases and traits. Nat Genet. 2015;47:1236–1241.
- 681 30. Martin AR, Daly MJ, Robinson EB, Hyman SE, Neale BM. Predicting Polygenic Risk of  
682 Psychiatric Disorders. Biol Psychiatry. 2019;86:97–109.
- 683 31. Bulik-Sullivan BK, Loh P-R, Finucane HK, Ripke S, Yang J, Schizophrenia Working Group of the



- 684 Psychiatric Genomics Consortium, et al. LD Score regression distinguishes confounding from  
685 polygenicity in genome-wide association studies. *Nat Genet.* 2015;47:291–295.
- 686 32. de Leeuw CA, Mooij JM, Heskes T, Posthuma D. MAGMA: Generalized Gene-Set Analysis of  
687 GWAS Data. *PLOS Comput Biol.* 2015;11:e1004219.
- 688 33. Chang CC, Chow CC, Tellier LCAM, Vattikuti S, Purcell SM, Lee JJ. Second-generation PLINK:  
689 rising to the challenge of larger and richer datasets. *Gigascience.* 2015;4:7.
- 690 34. Rogers P, Stoner J. Modification of the Sandwich Estimator in Generalized Estimating  
691 Equations with Correlated Binary Outcomes in Rare Event and Small Sample Settings. *Am J*  
692 *Appl Math Stat.* 2015;3:243–251.
- 693 35. Purcell S, Neale B, Todd-Brown K, Thomas L, Ferreira MAR, Bender D, et al. PLINK: a tool set  
694 for whole-genome association and population-based linkage analyses. *Am J Hum Genet.*  
695 2007;81:559–575.
- 696 36. Yang J, Lee SH, Goddard ME, Visscher PM. GCTA: a tool for genome-wide complex trait  
697 analysis. *Am J Hum Genet.* 2011;88:76–82.
- 698 37. Grotzinger AD, Rhemtulla M, de Vlaming R, Ritchie SJ, Mallard TT, Hill WD, et al. Genomic  
699 structural equation modelling provides insights into the multivariate genetic architecture of  
700 complex traits. *Nat Hum Behav.* 2019;3:513–525.
- 701 38. Rautiainen M-R, Paunio T, Repo-Tiihonen E, Virkkunen M, Ollila HM, Sulkava S, et al. Genome-  
702 wide association study of antisocial personality disorder. *Transl Psychiatry.* 2016;6:e883–e883.
- 703 39. Tielbeek JJ, Johansson A, Polderman TJC, Rautiainen M-R, Jansen P, Taylor M, et al. Genome-  
704 Wide Association Studies of a Broad Spectrum of Antisocial Behavior. *JAMA Psychiatry.*  
705 2017;74:1242.
- 706 40. Hagenbeek FA, van Dongen J, Kluft C, Hankemeier T, Ligthart L, Willemsen G, et al. Adult  
707 aggressive behavior in humans and biomarkers: a focus on lipids and methylation. *J Pediatr*  
708 *Neonatal Individ Med.* 2018;7:e070204.
- 709 41. Raine A, Fung ALC, Portnoy J, Choy O, Spring VL. Low heart rate as a risk factor for child and

- 710 adolescent proactive aggressive and impulsive psychopathic behavior. *Aggress Behav.*  
711 2014;40:290–299.
- 712 42. Latvala A, Kuja-Halkola R, Rück C, D’Onofrio BM, Jernberg T, Almqvist C, et al. Association of  
713 Resting Heart Rate and Blood Pressure in Late Adolescence With Subsequent Mental  
714 Disorders. *JAMA Psychiatry.* 2016;73:1268.
- 715 43. Brain PF, Susman EJ. Hormonal aspects of aggression and violence. *Handb. antisocial Behav.,*  
716 *Hoboken: John Wiley & Sons Inc.;* 1997. p. 314–323.
- 717 44. Ramirez JM. Hormones and aggression in childhood and adolescence. *Aggress Violent Behav.*  
718 2003;8:621–644.
- 719 45. Bycroft C, Freeman C, Petkova D, Band G, Elliott LT, Sharp K, et al. The UK Biobank resource  
720 with deep phenotyping and genomic data. *Nature.* 2018;562:203–209.
- 721 46. Harris JA, Vernon PA, Boomsma DI. The Heritability of Testosterone: A Study of Dutch  
722 Adolescent Twins and Their Parents. *Behav Genet.* 1998;28:165–171.
- 723 47. Hudziak JJ, van Beijsterveldt CEM, Bartels M, Rietveld MJH, Rettew DC, Derks EM, et al.  
724 Individual Differences in Aggression: Genetic Analyses by Age, Gender, and Informant in 3-, 7-,  
725 and 10-Year-Old Dutch Twins. *Behav Genet.* 2003;33:575–589.
- 726 48. Visscher PM, Wray NR, Zhang Q, Sklar P, McCarthy MI, Brown MA, et al. 10 years of GWAS  
727 discovery: biology, function, and translation. *Am J Hum Genet.* 2017;101:5–22.
- 728 49. Pasaniuc B, Price AL. Dissecting the genetics of complex traits using summary association  
729 statistics. *Nat Rev Genet.* 2017;18:117–127.
- 730 50. Watanabe K, Stringer S, Frei O, Umićević Mirkov M, de Leeuw C, Polderman TJC, et al. A  
731 global overview of pleiotropy and genetic architecture in complex traits. *Nat Genet.* 2019:1–  
732 10.
- 733
- 734

735 **Figures**

736

737 **Figure 1.** Manhattan plot of overall meta-analysis for childhood aggression ( $AGG_{overall}$ ). Red triangles  
738 represent SNPs that were included in the significant genes from the gene-based analysis. SNPs for  
739 *ST3GAL3* and *IPO13* are included in the same locus on chromosome 1.

740

741 **Figure 2A.** Proportion of explained variance (vertical axis) in childhood aggression at age 7 by  
742 polygenic scores from the overall GWAMA for multiple  $P$ -value thresholds (horizontal axis). Asterisks  
743 indicate scores with a significant beta after FDR correction for multiple testing at  $\alpha=0.05$  for 16 tests.

744

745 **Figure 2B.** Proportion of explained variance (vertical axis) in retrospective adolescent CD (two sided  
746 tests). Blue bars indicate positive correlation with the conduct disorder score.

747

748 **Figure 3.** Genetic correlation with external phenotypes. Phenotypes are ordered by domain. Bars  
749 indicate 95% confidence intervals.

750

751

752 **Table**

753 **Table 1.** (a) multivariate test statistic in the meta-analysis of results based on overlapping samples.  
 754 (b) expected value for the cross-trait-intercept. (c) Effective sample size for a GWAMA.

|                                                                                                                                                                        |                                                                                                                                                                                                                                                                                                                                                                                                                                                                                                                             |
|------------------------------------------------------------------------------------------------------------------------------------------------------------------------|-----------------------------------------------------------------------------------------------------------------------------------------------------------------------------------------------------------------------------------------------------------------------------------------------------------------------------------------------------------------------------------------------------------------------------------------------------------------------------------------------------------------------------|
| $Z_{multi,j}$ $= \frac{\sum_{i=1}^P w_{ji} Z_{ji}}{\sqrt{\sum_{i=1}^P w_{ji} V_{ji} + \sum_{i=1}^P \sum_{k=1}^P \sqrt{w_{ji} w_{jk}} CTI_{ik} \text{ for } i \neq k}}$ | <p>(a)</p> <p>Multivariate test-statistic for <math>j</math>-th SNP. <math>P</math> is the number of GWASs across which we run the meta-analysis; <math>w_{ji} = \sqrt{N_{ji} h_{SNP,i}^2}</math> is the weight given to the <math>j</math>th SNP in GWAS <math>i</math>, with <math>h_{SNP,i}^2</math> being the SNP-heritability of the trait analyzed in GWAS <math>i</math>; and <math>V_{ji} = 1</math> represents the variance of the distribution of <math>Z_{ji}</math> under the null hypothesis of no effect.</p> |
| $CTI_{ik} = \frac{N_s r_p}{\sqrt{N_{ji} N_{jk}}}$                                                                                                                      | <p>(b)</p> <p>Cross-trait-intercept between GWAS <math>i</math> and <math>k</math>. <math>N_s</math> represents the sample overlap; <math>r_p</math> indicates the phenotypic correlation; <math>N_{ji}</math> and <math>N_{jk}</math> are the sample sizes at SNP <math>j</math> for respectively GWASs <math>i</math> and <math>k</math></p>                                                                                                                                                                              |
| $N_{eff} = \sqrt{N^T CTI^{-1} N}$                                                                                                                                      | <p>(c)</p> <p><math>N</math> is an <math>P</math>-sized vector of sample sizes, and <math>CTI</math> is the <math>P \times P</math> matrix of cross-trait-intercepts.</p>                                                                                                                                                                                                                                                                                                                                                   |

755

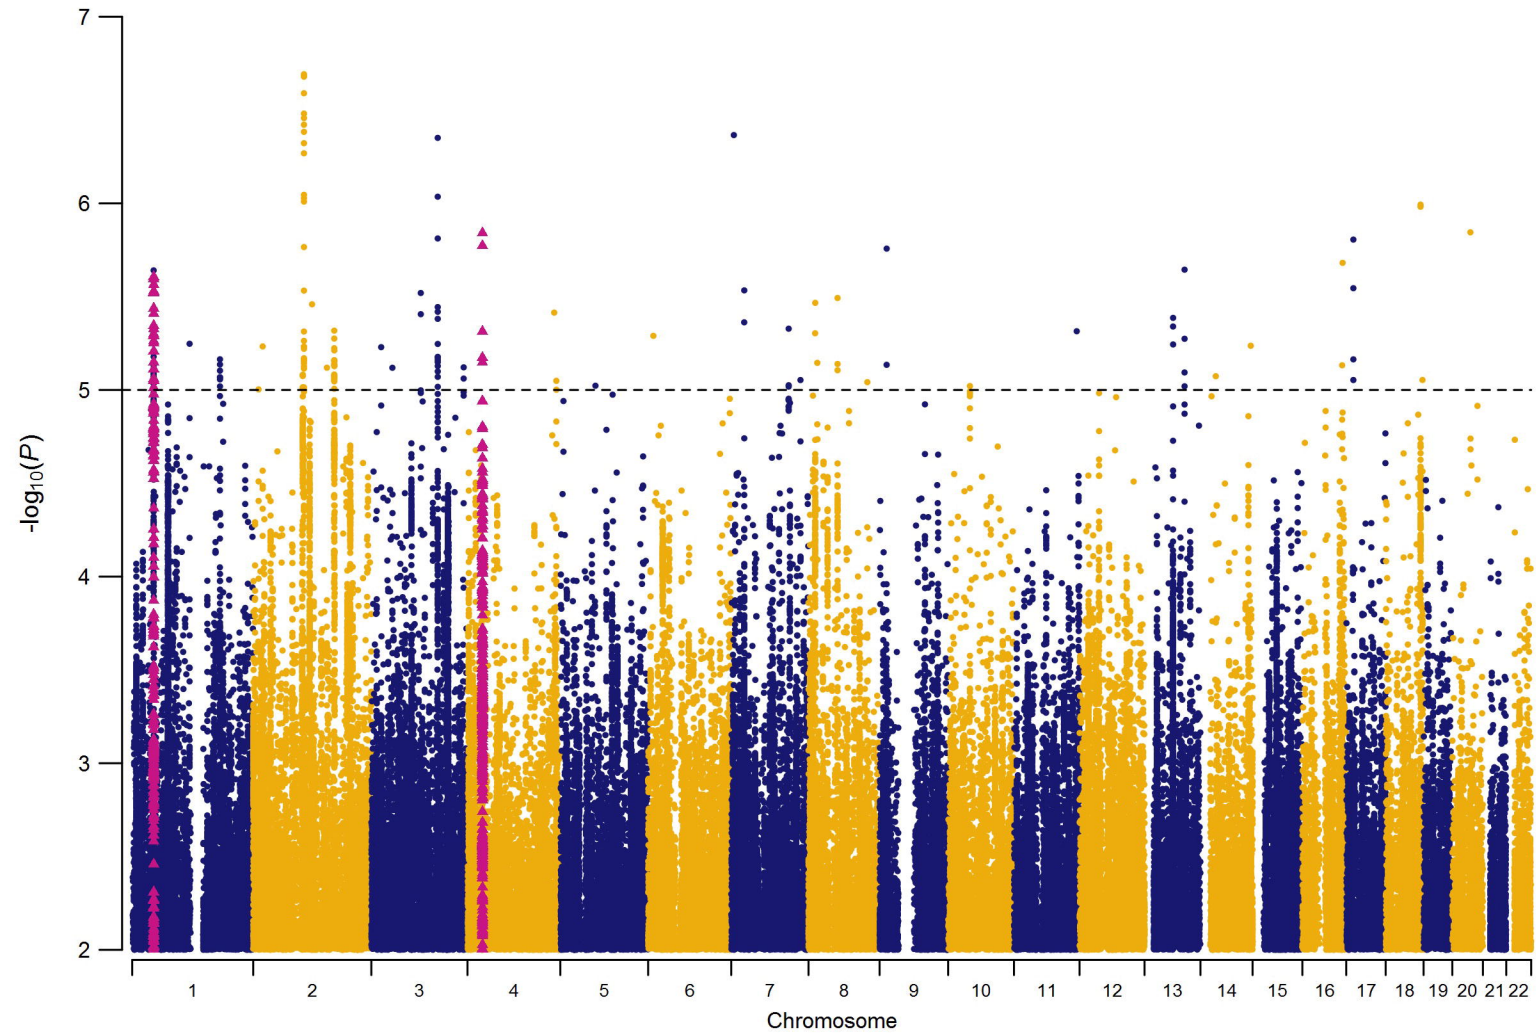

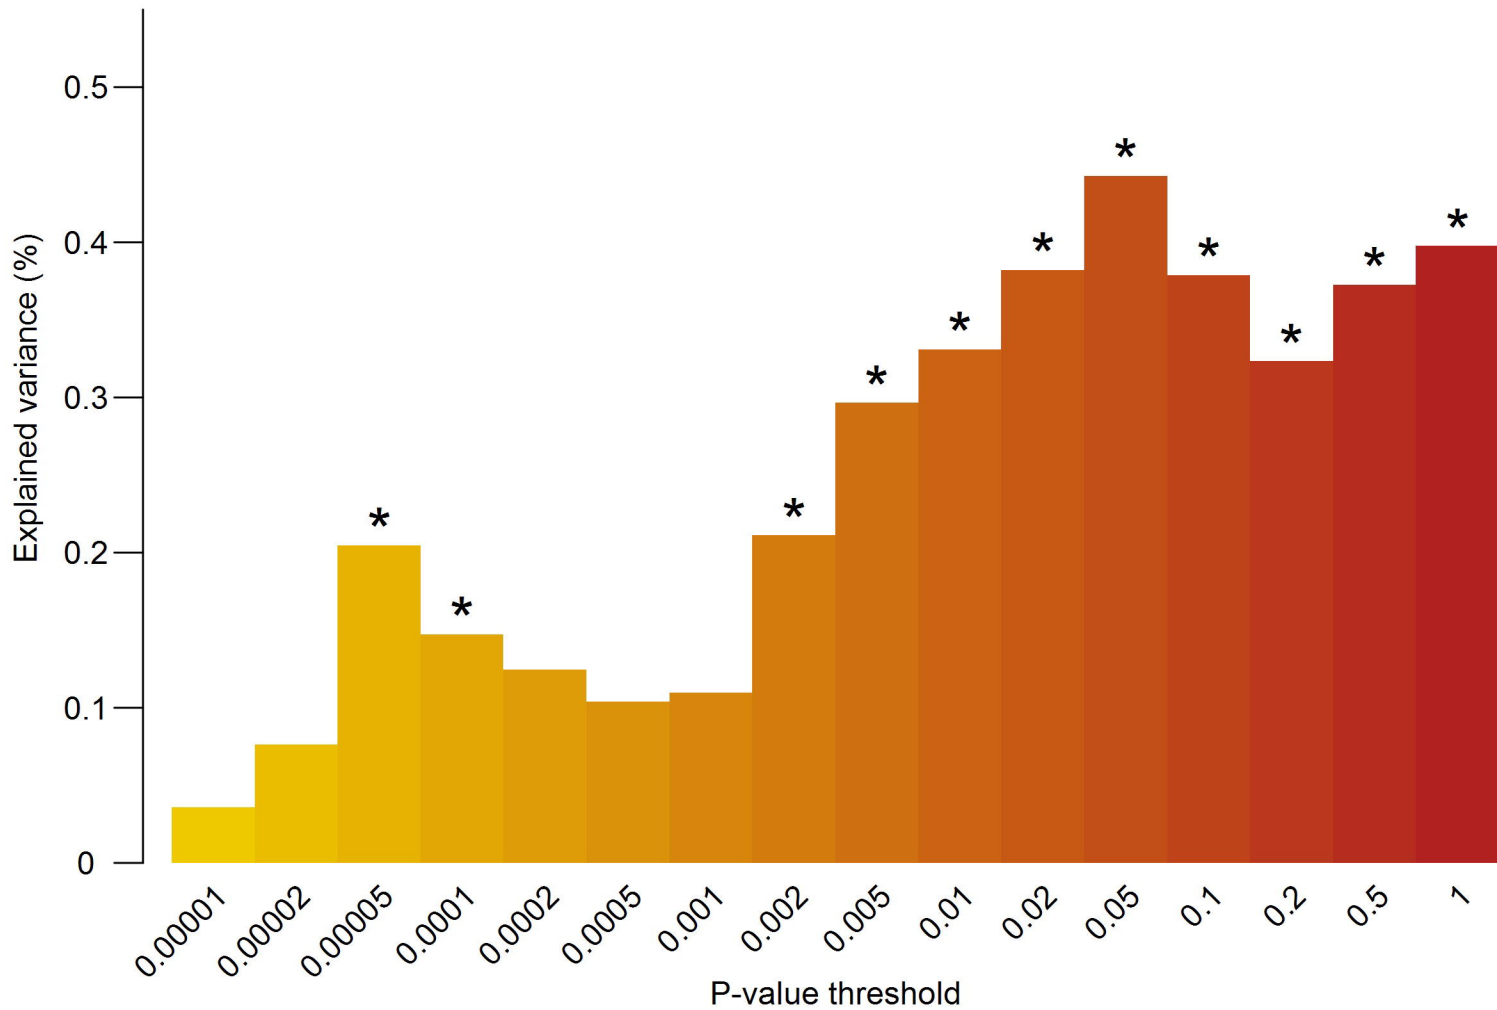

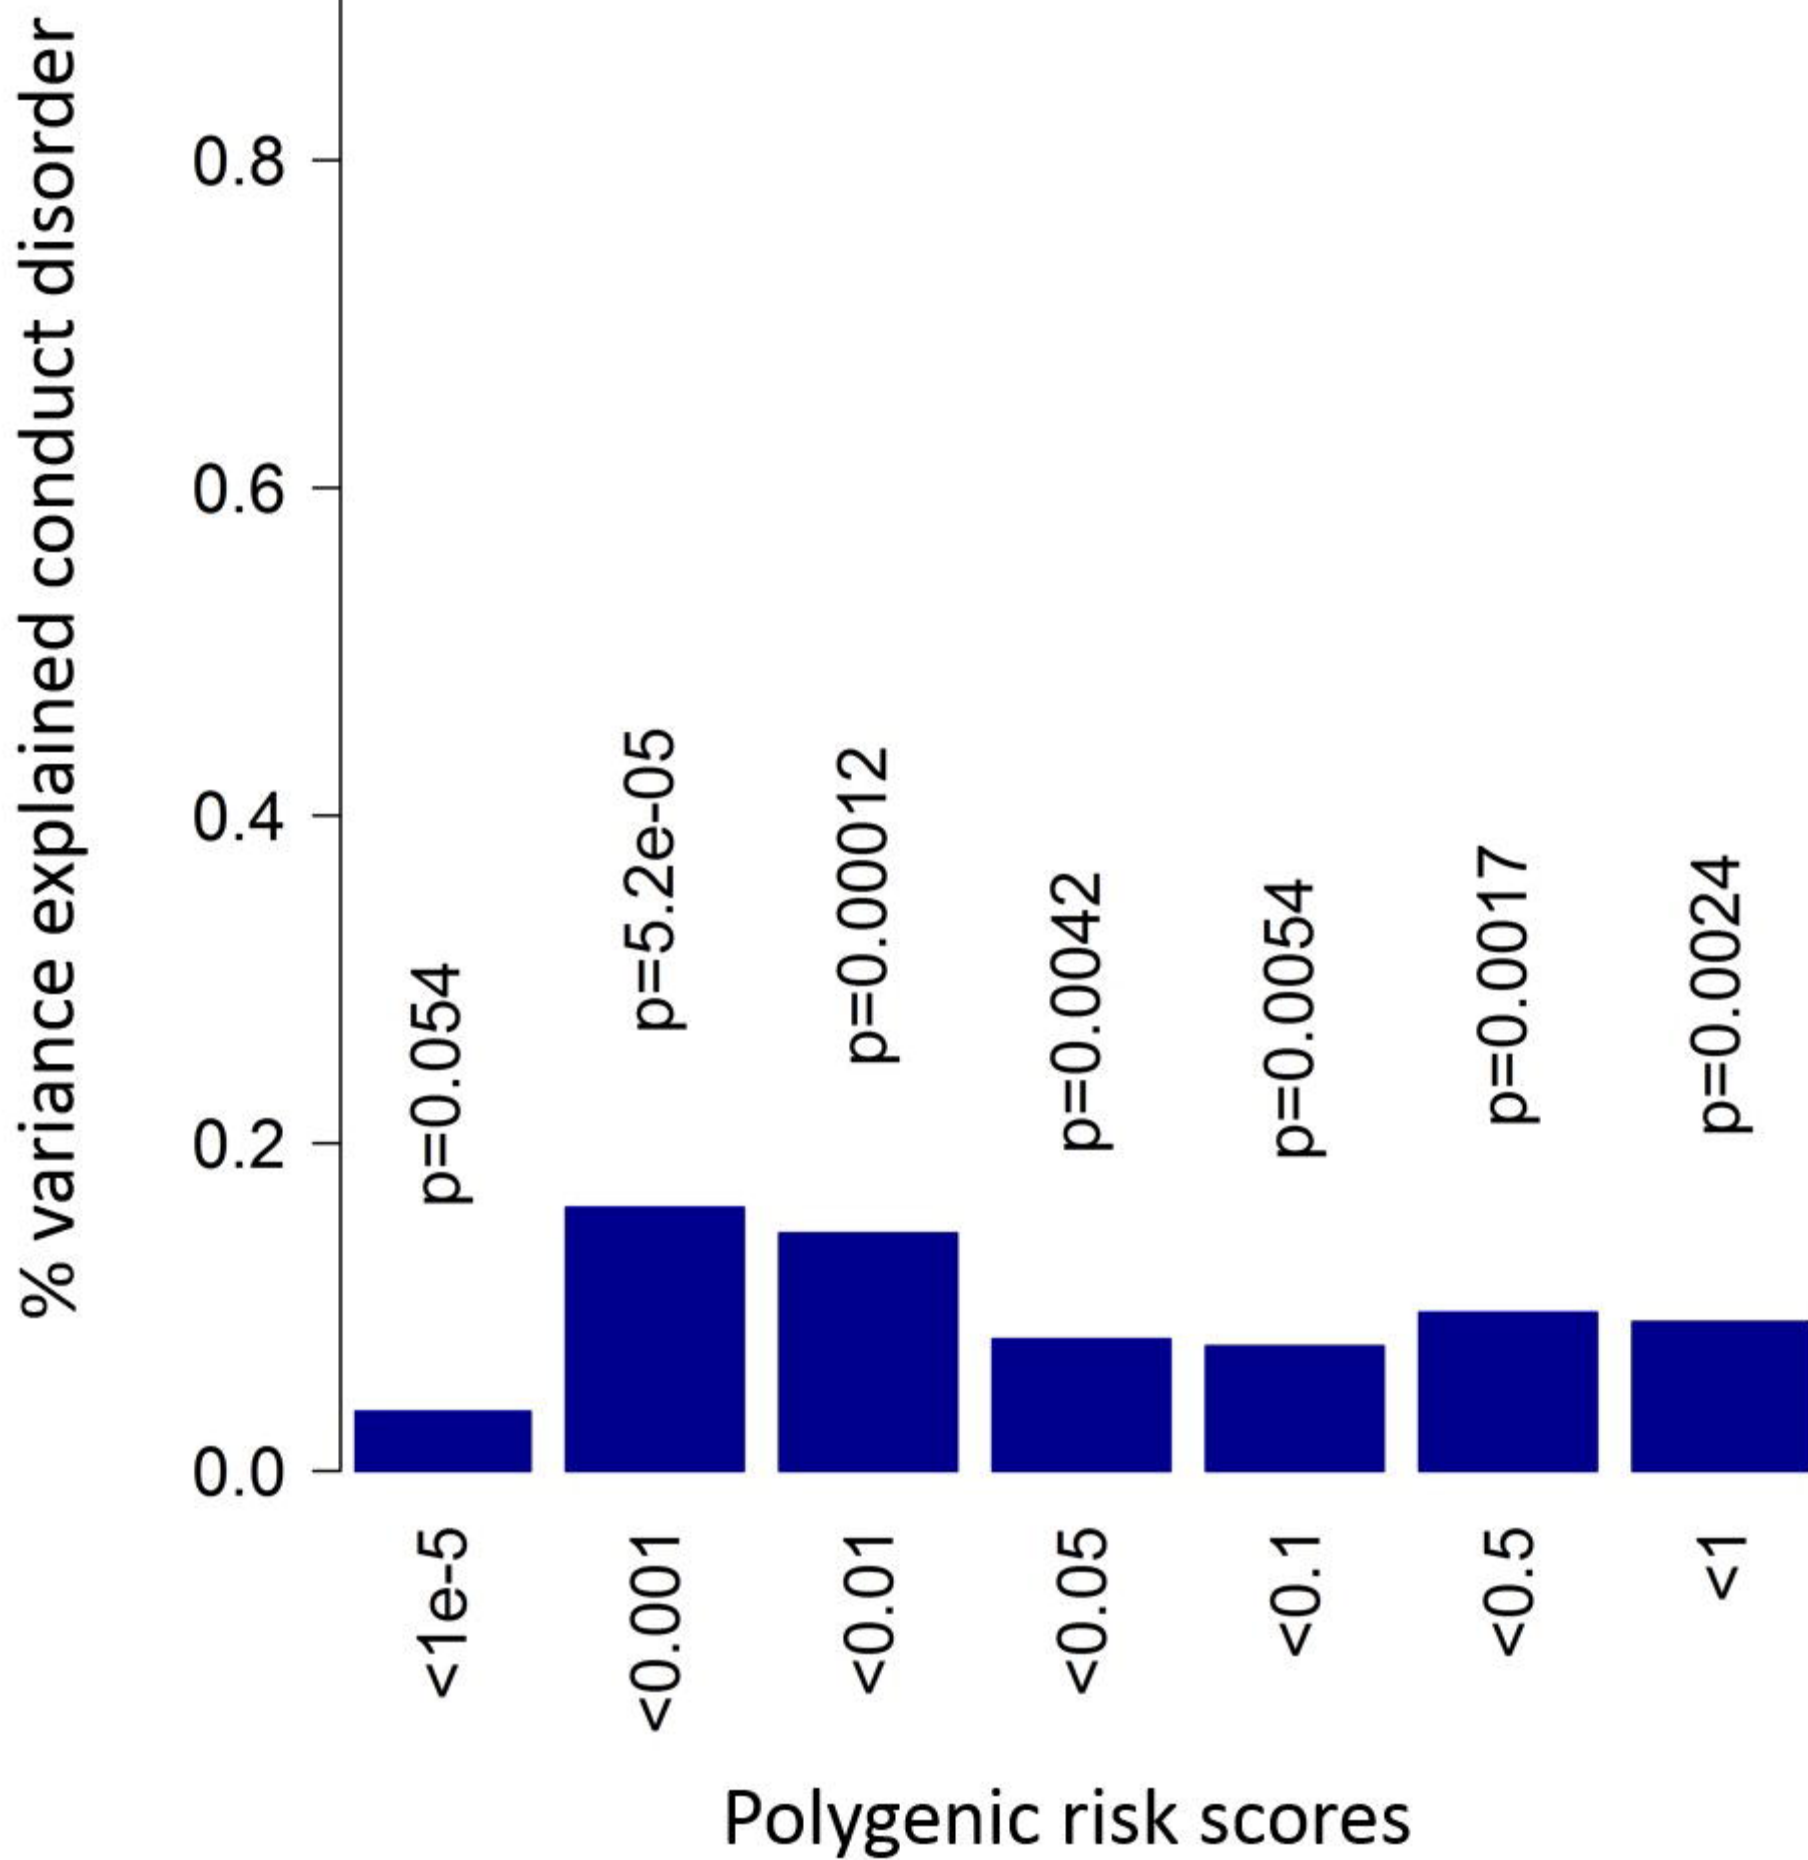

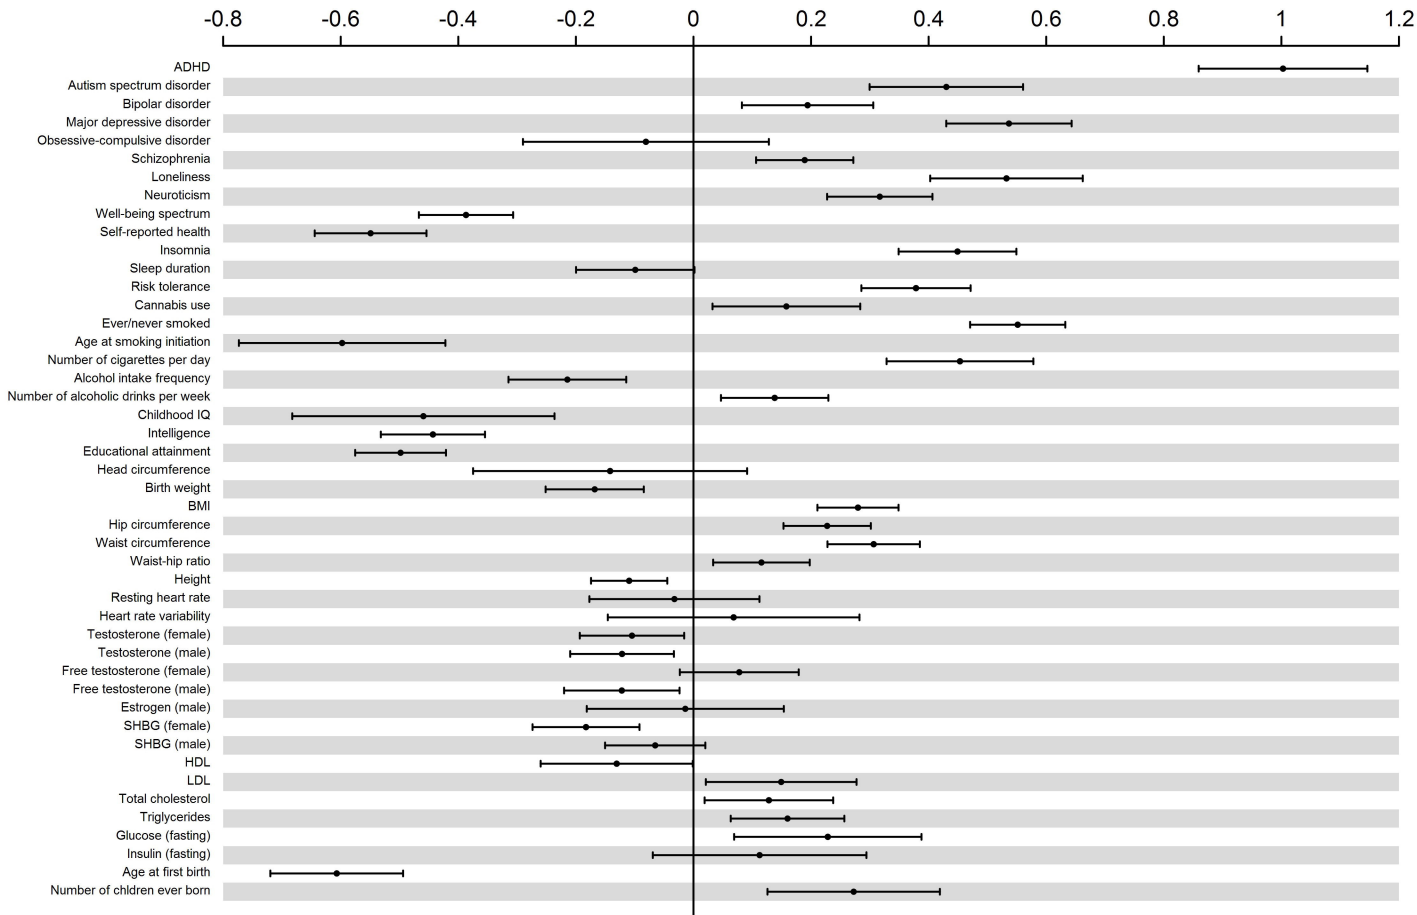



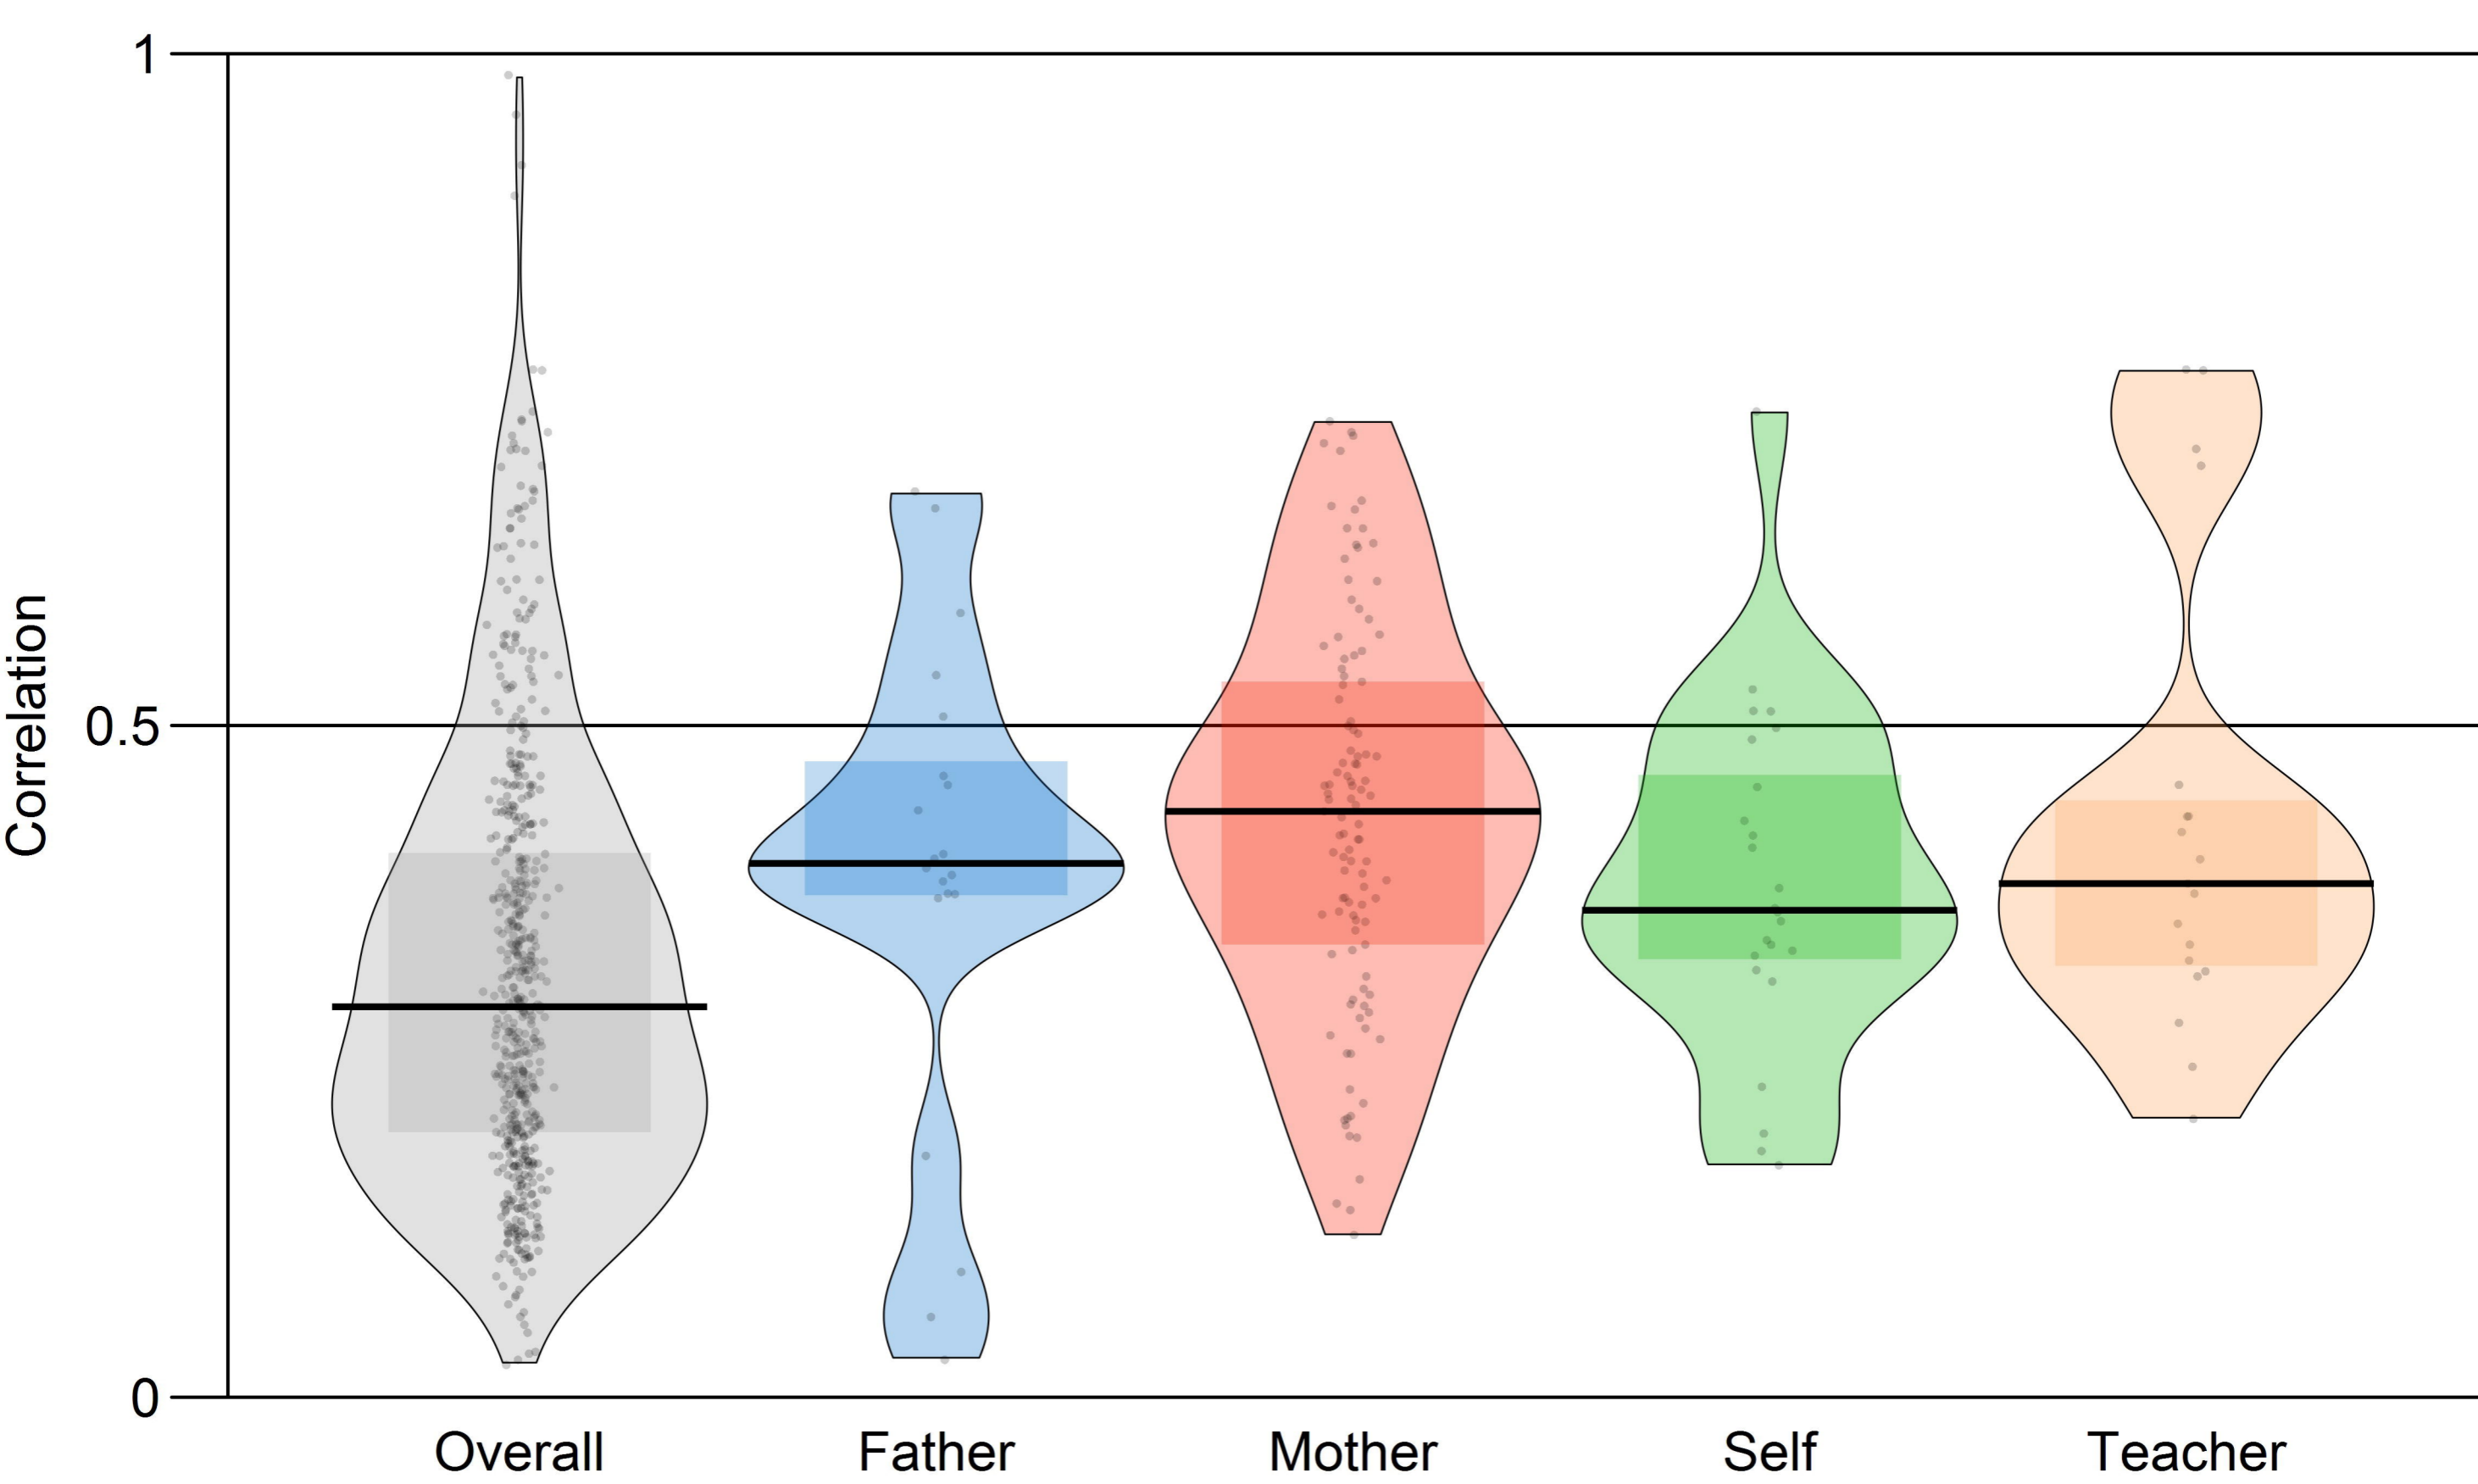

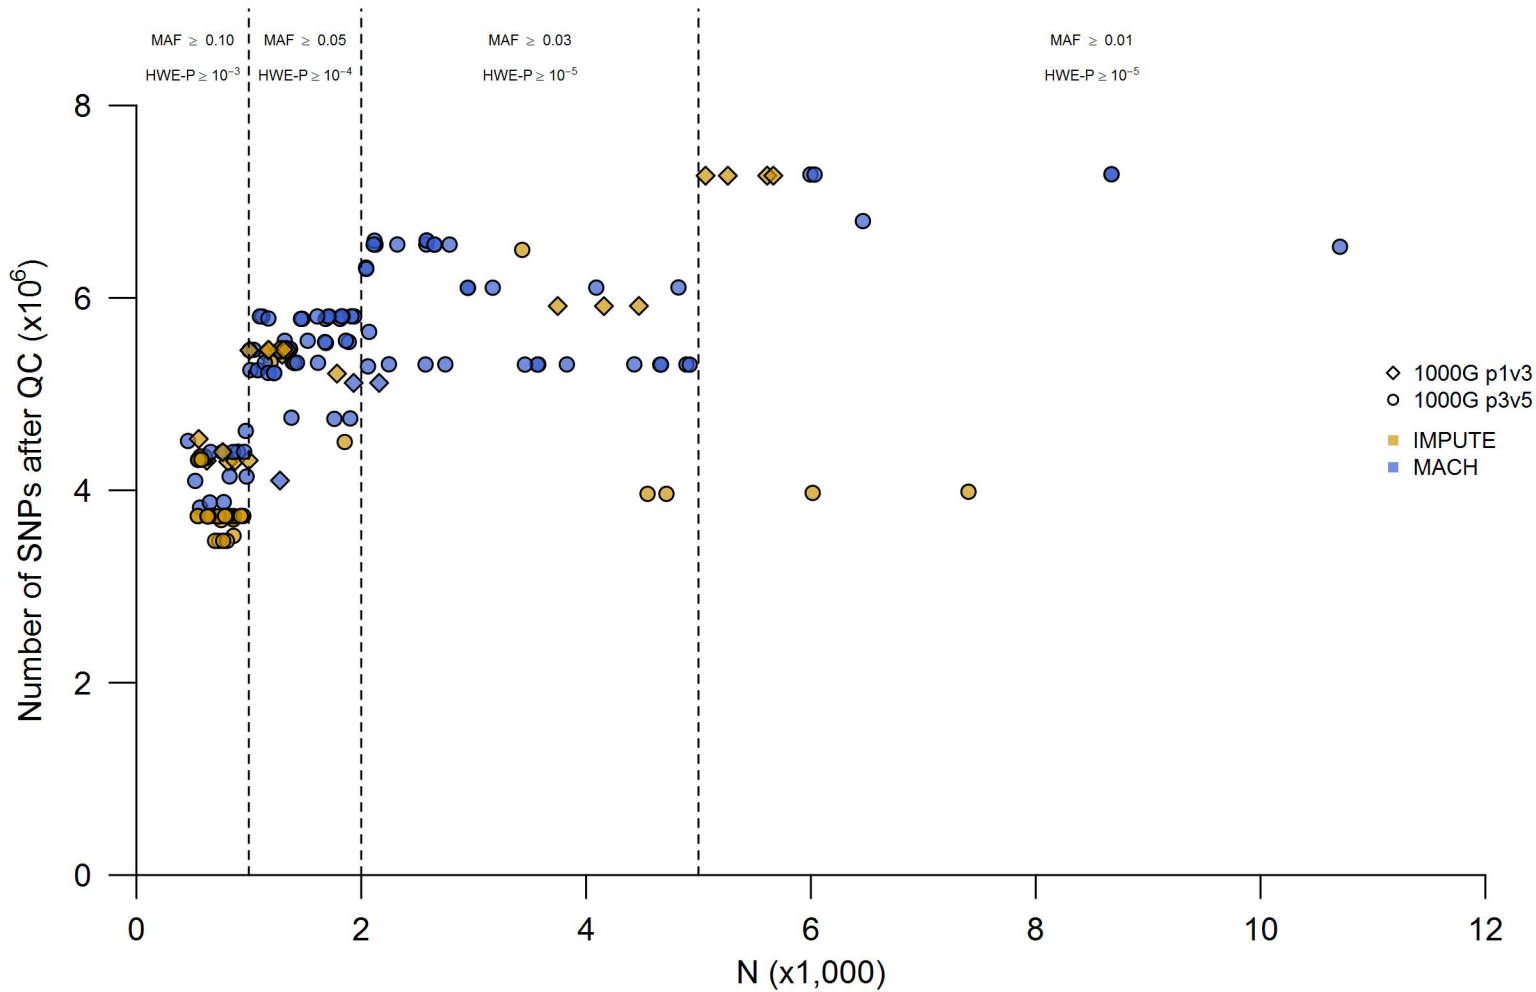



# ST3GAL3

Plotted SNPs

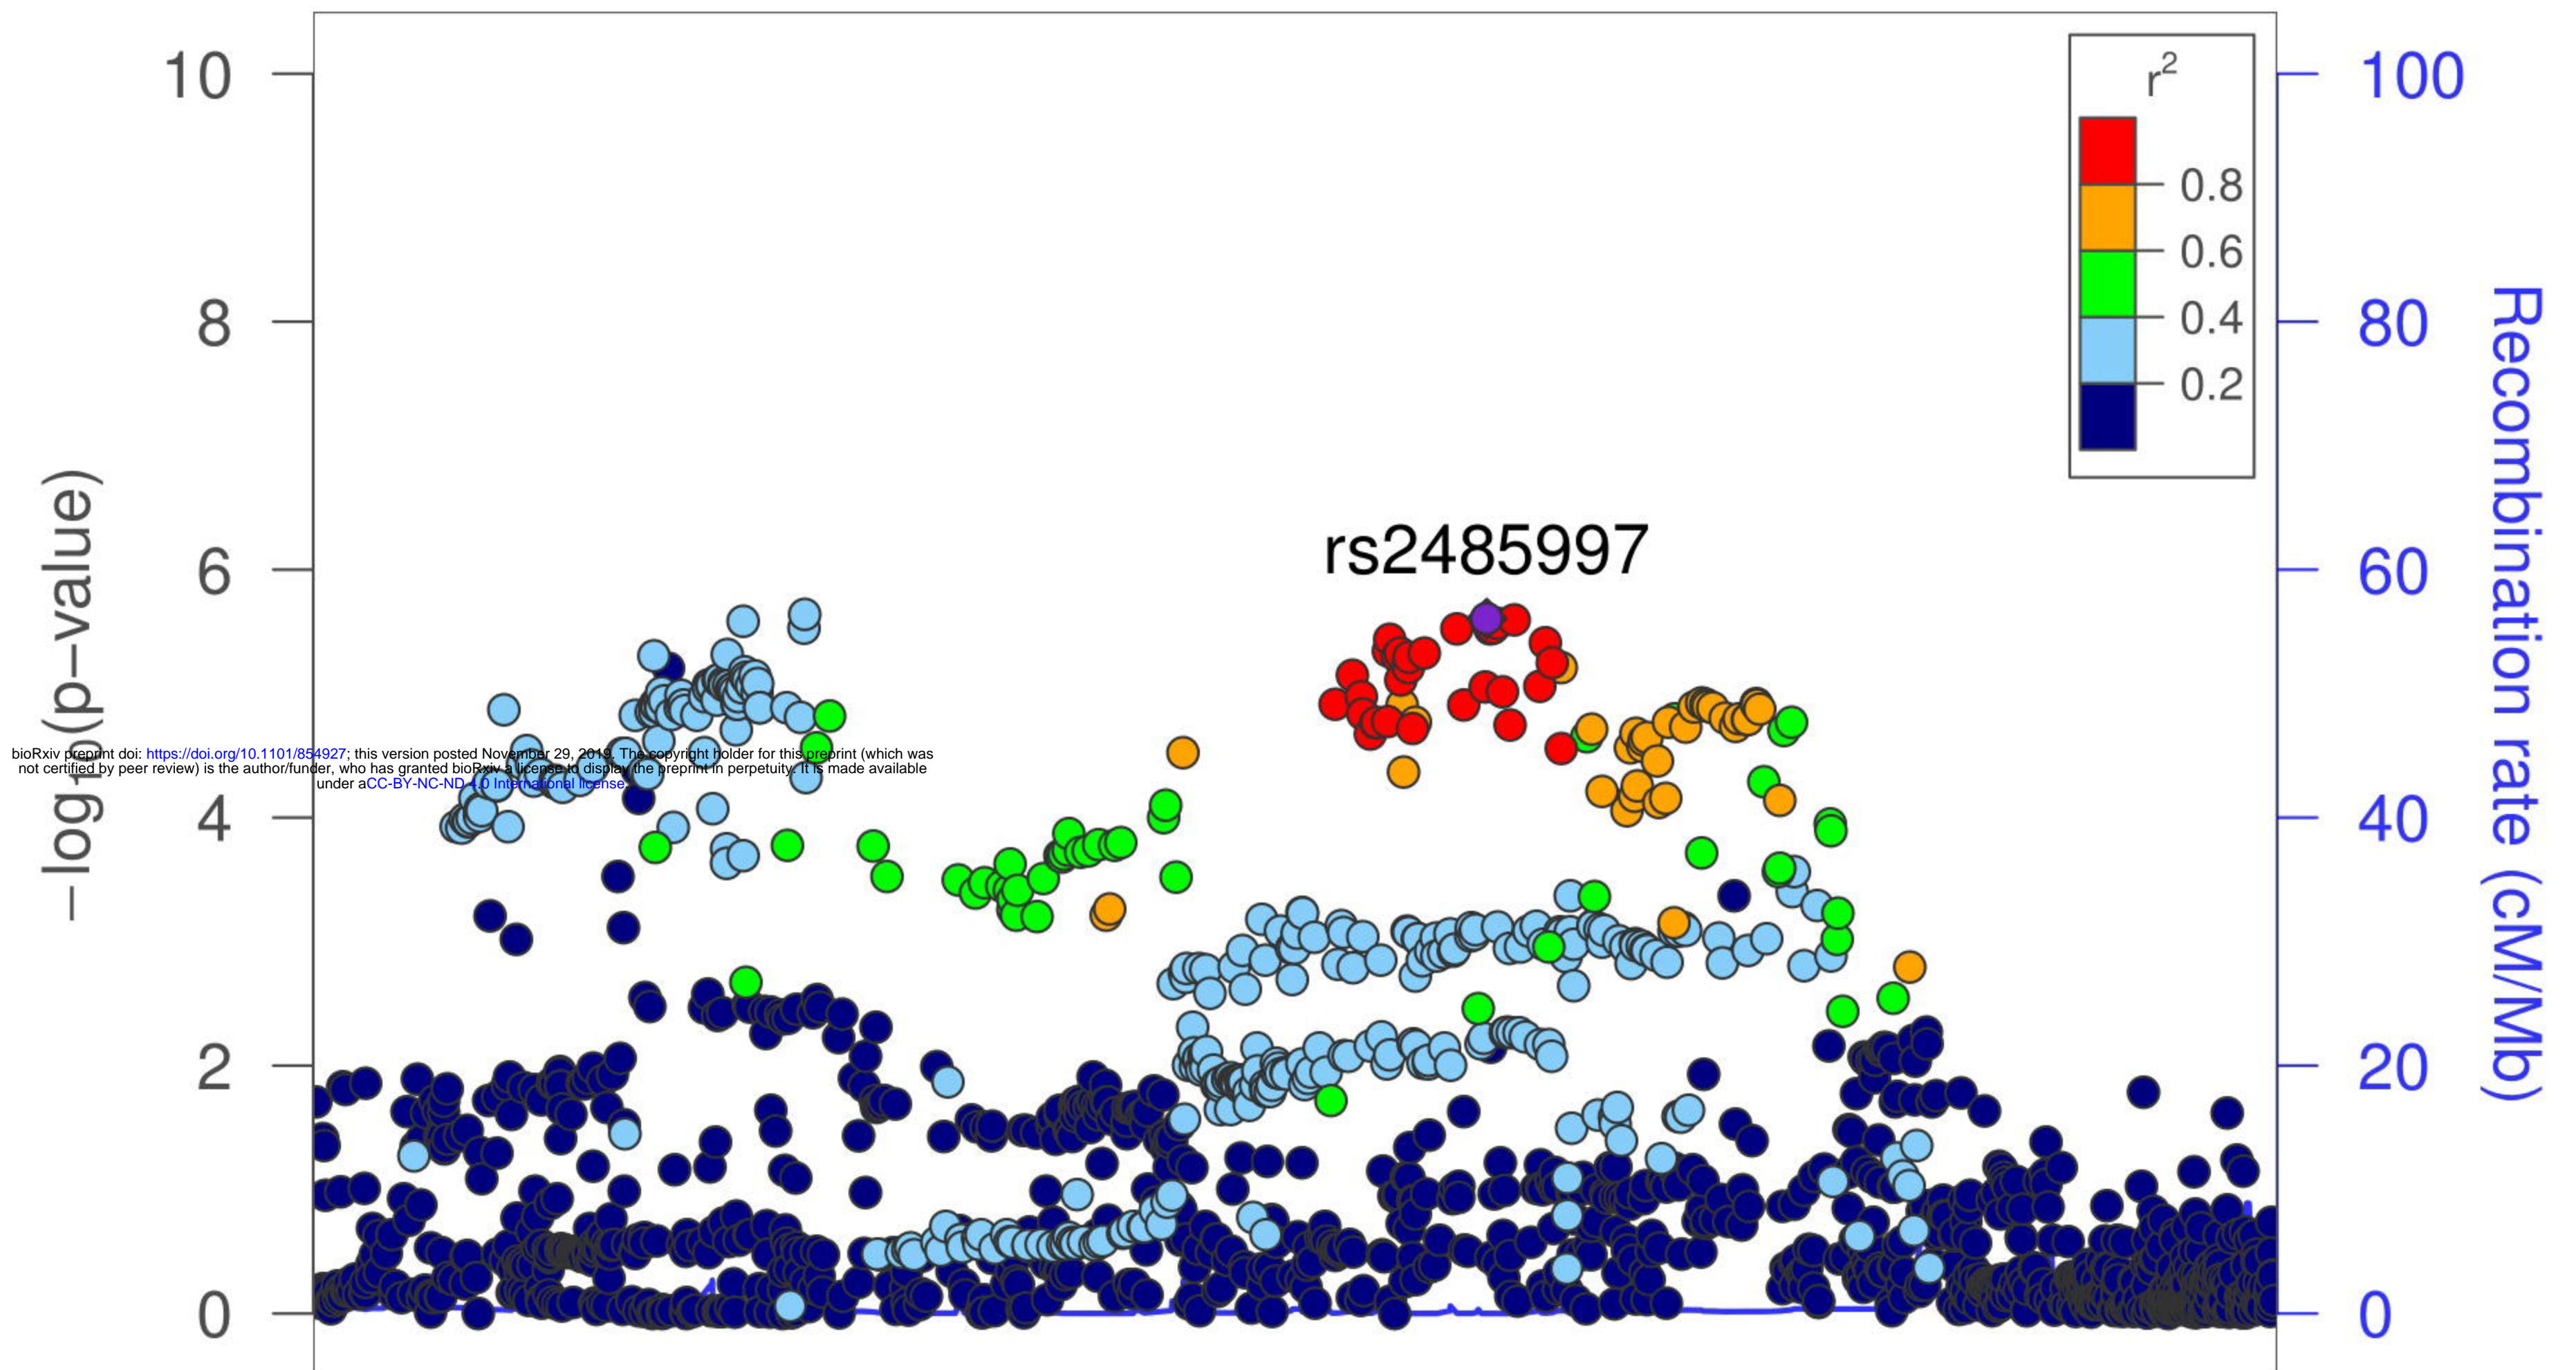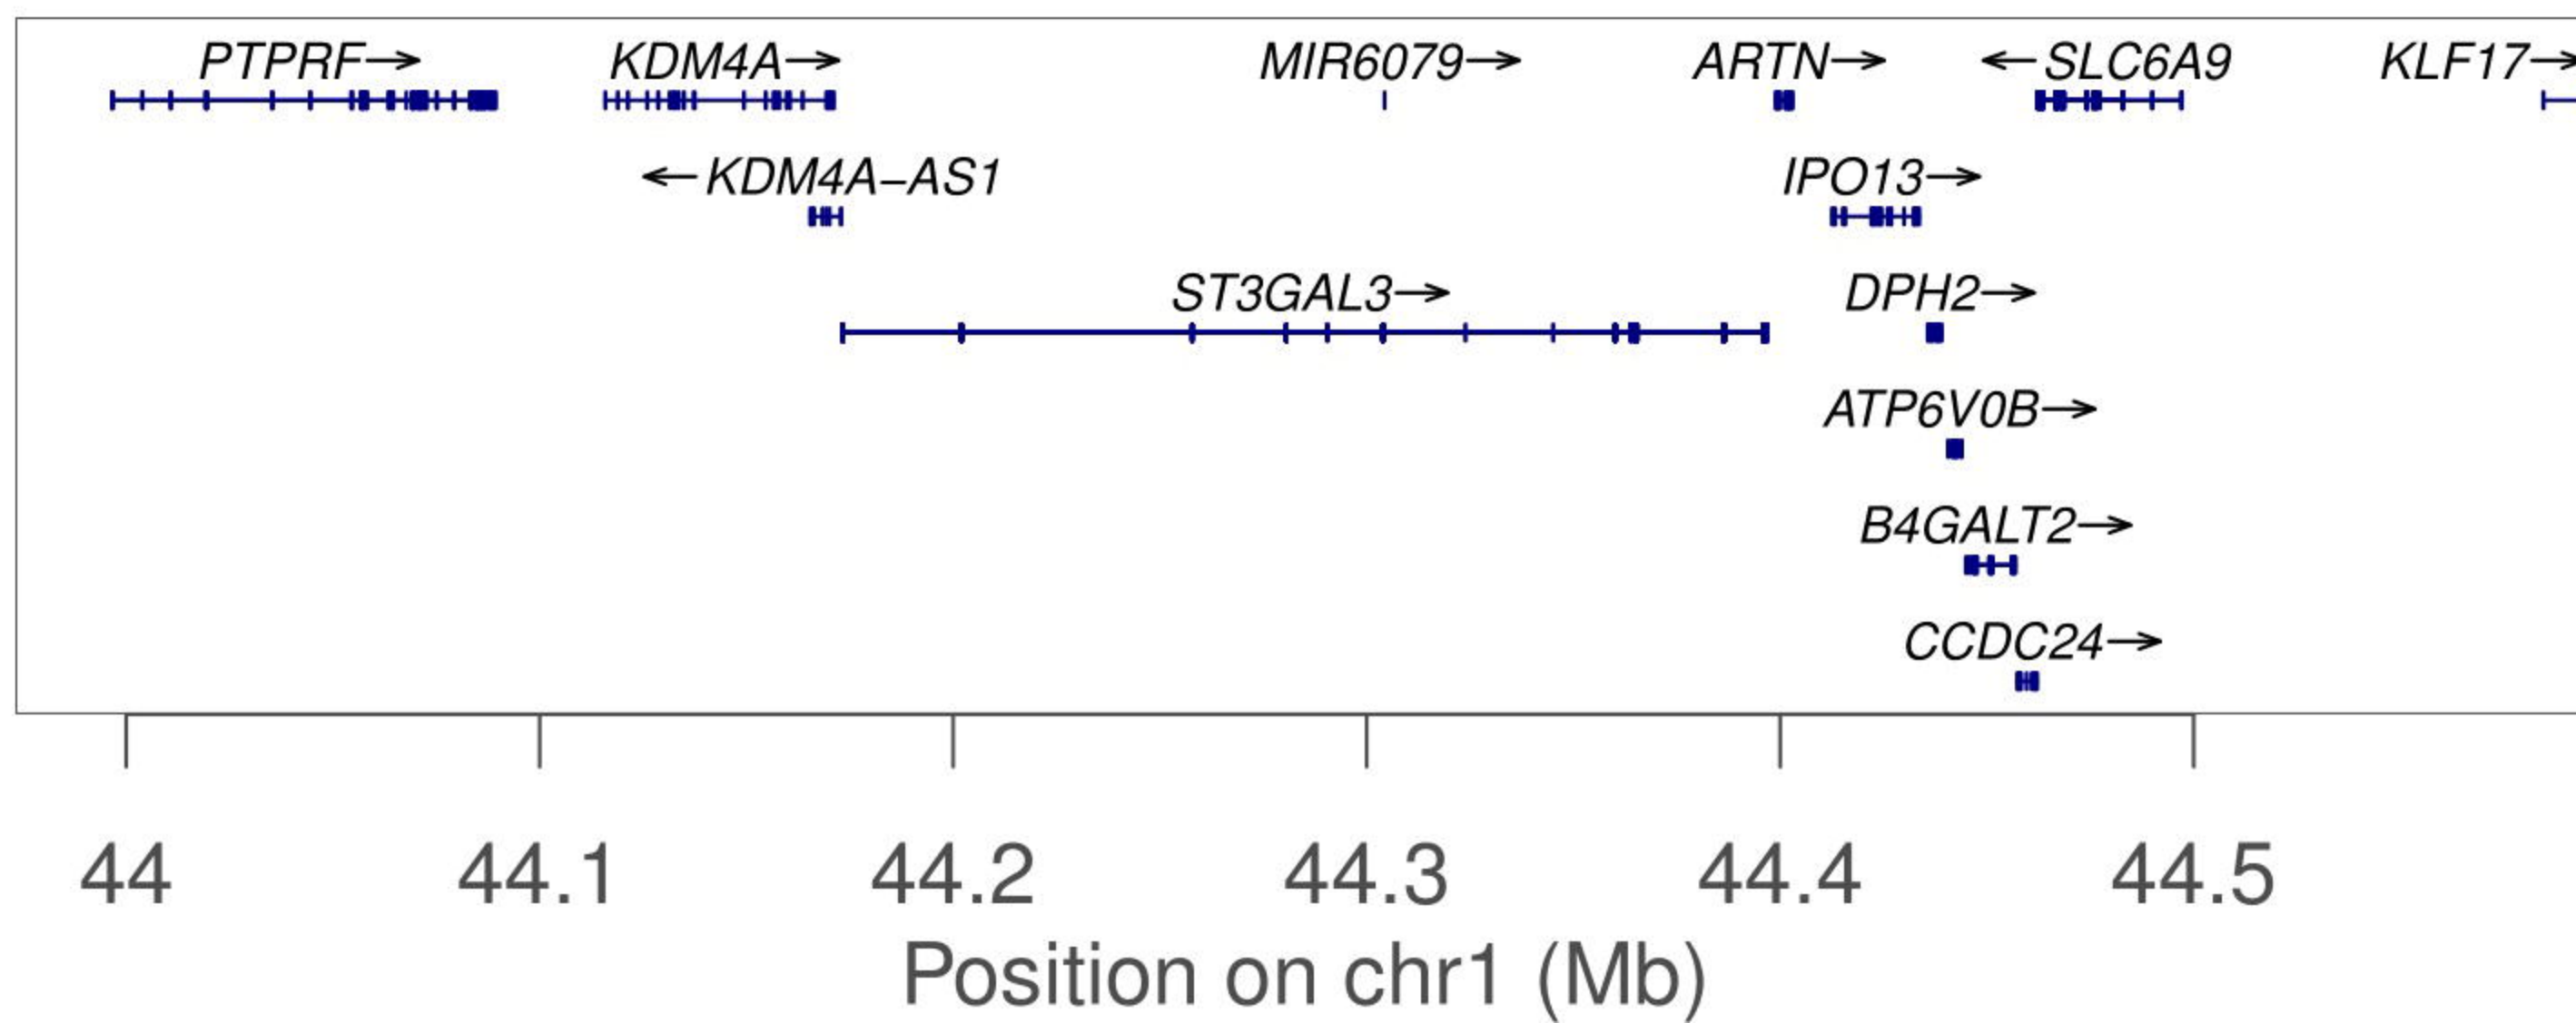



# PCDH7

Plotted SNPs

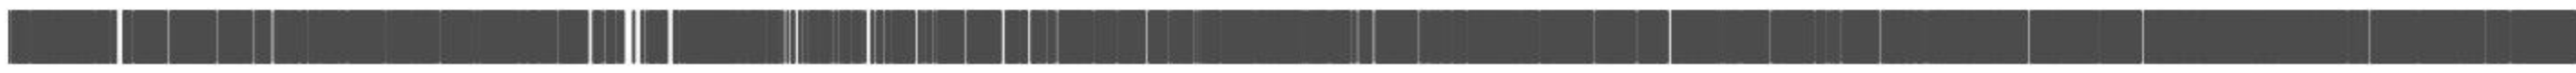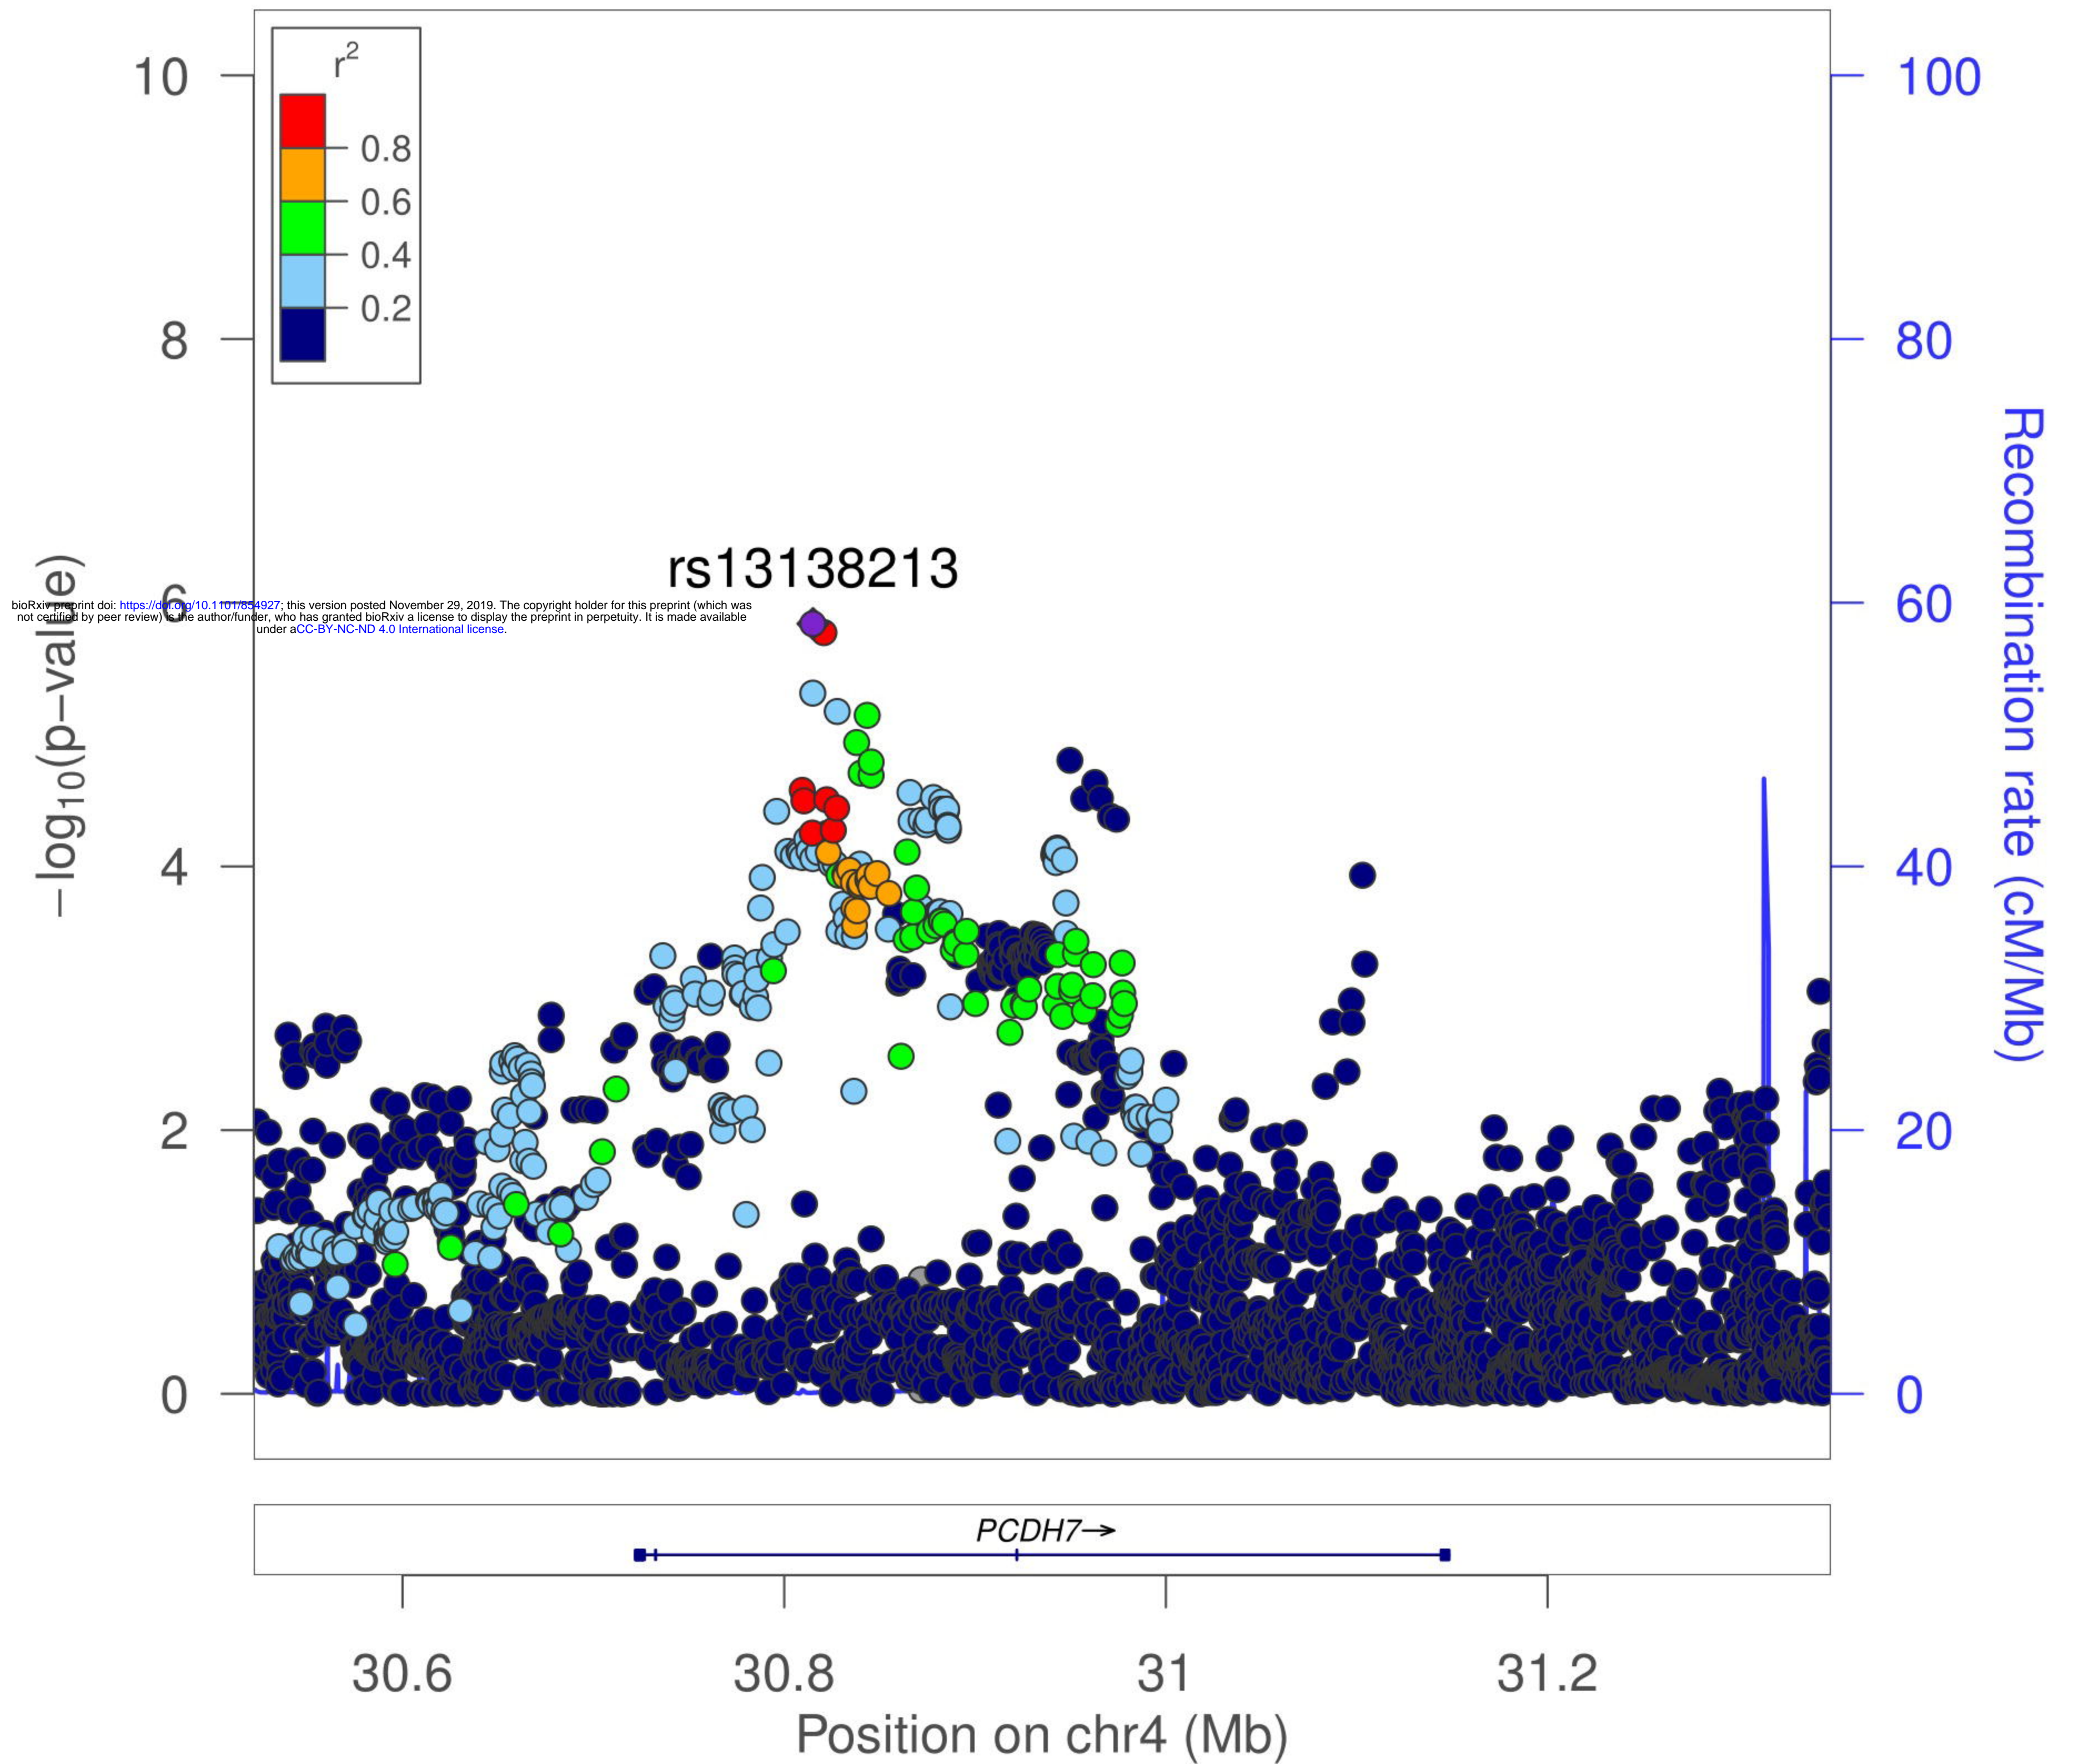



# IPO13

Plotted SNPs 

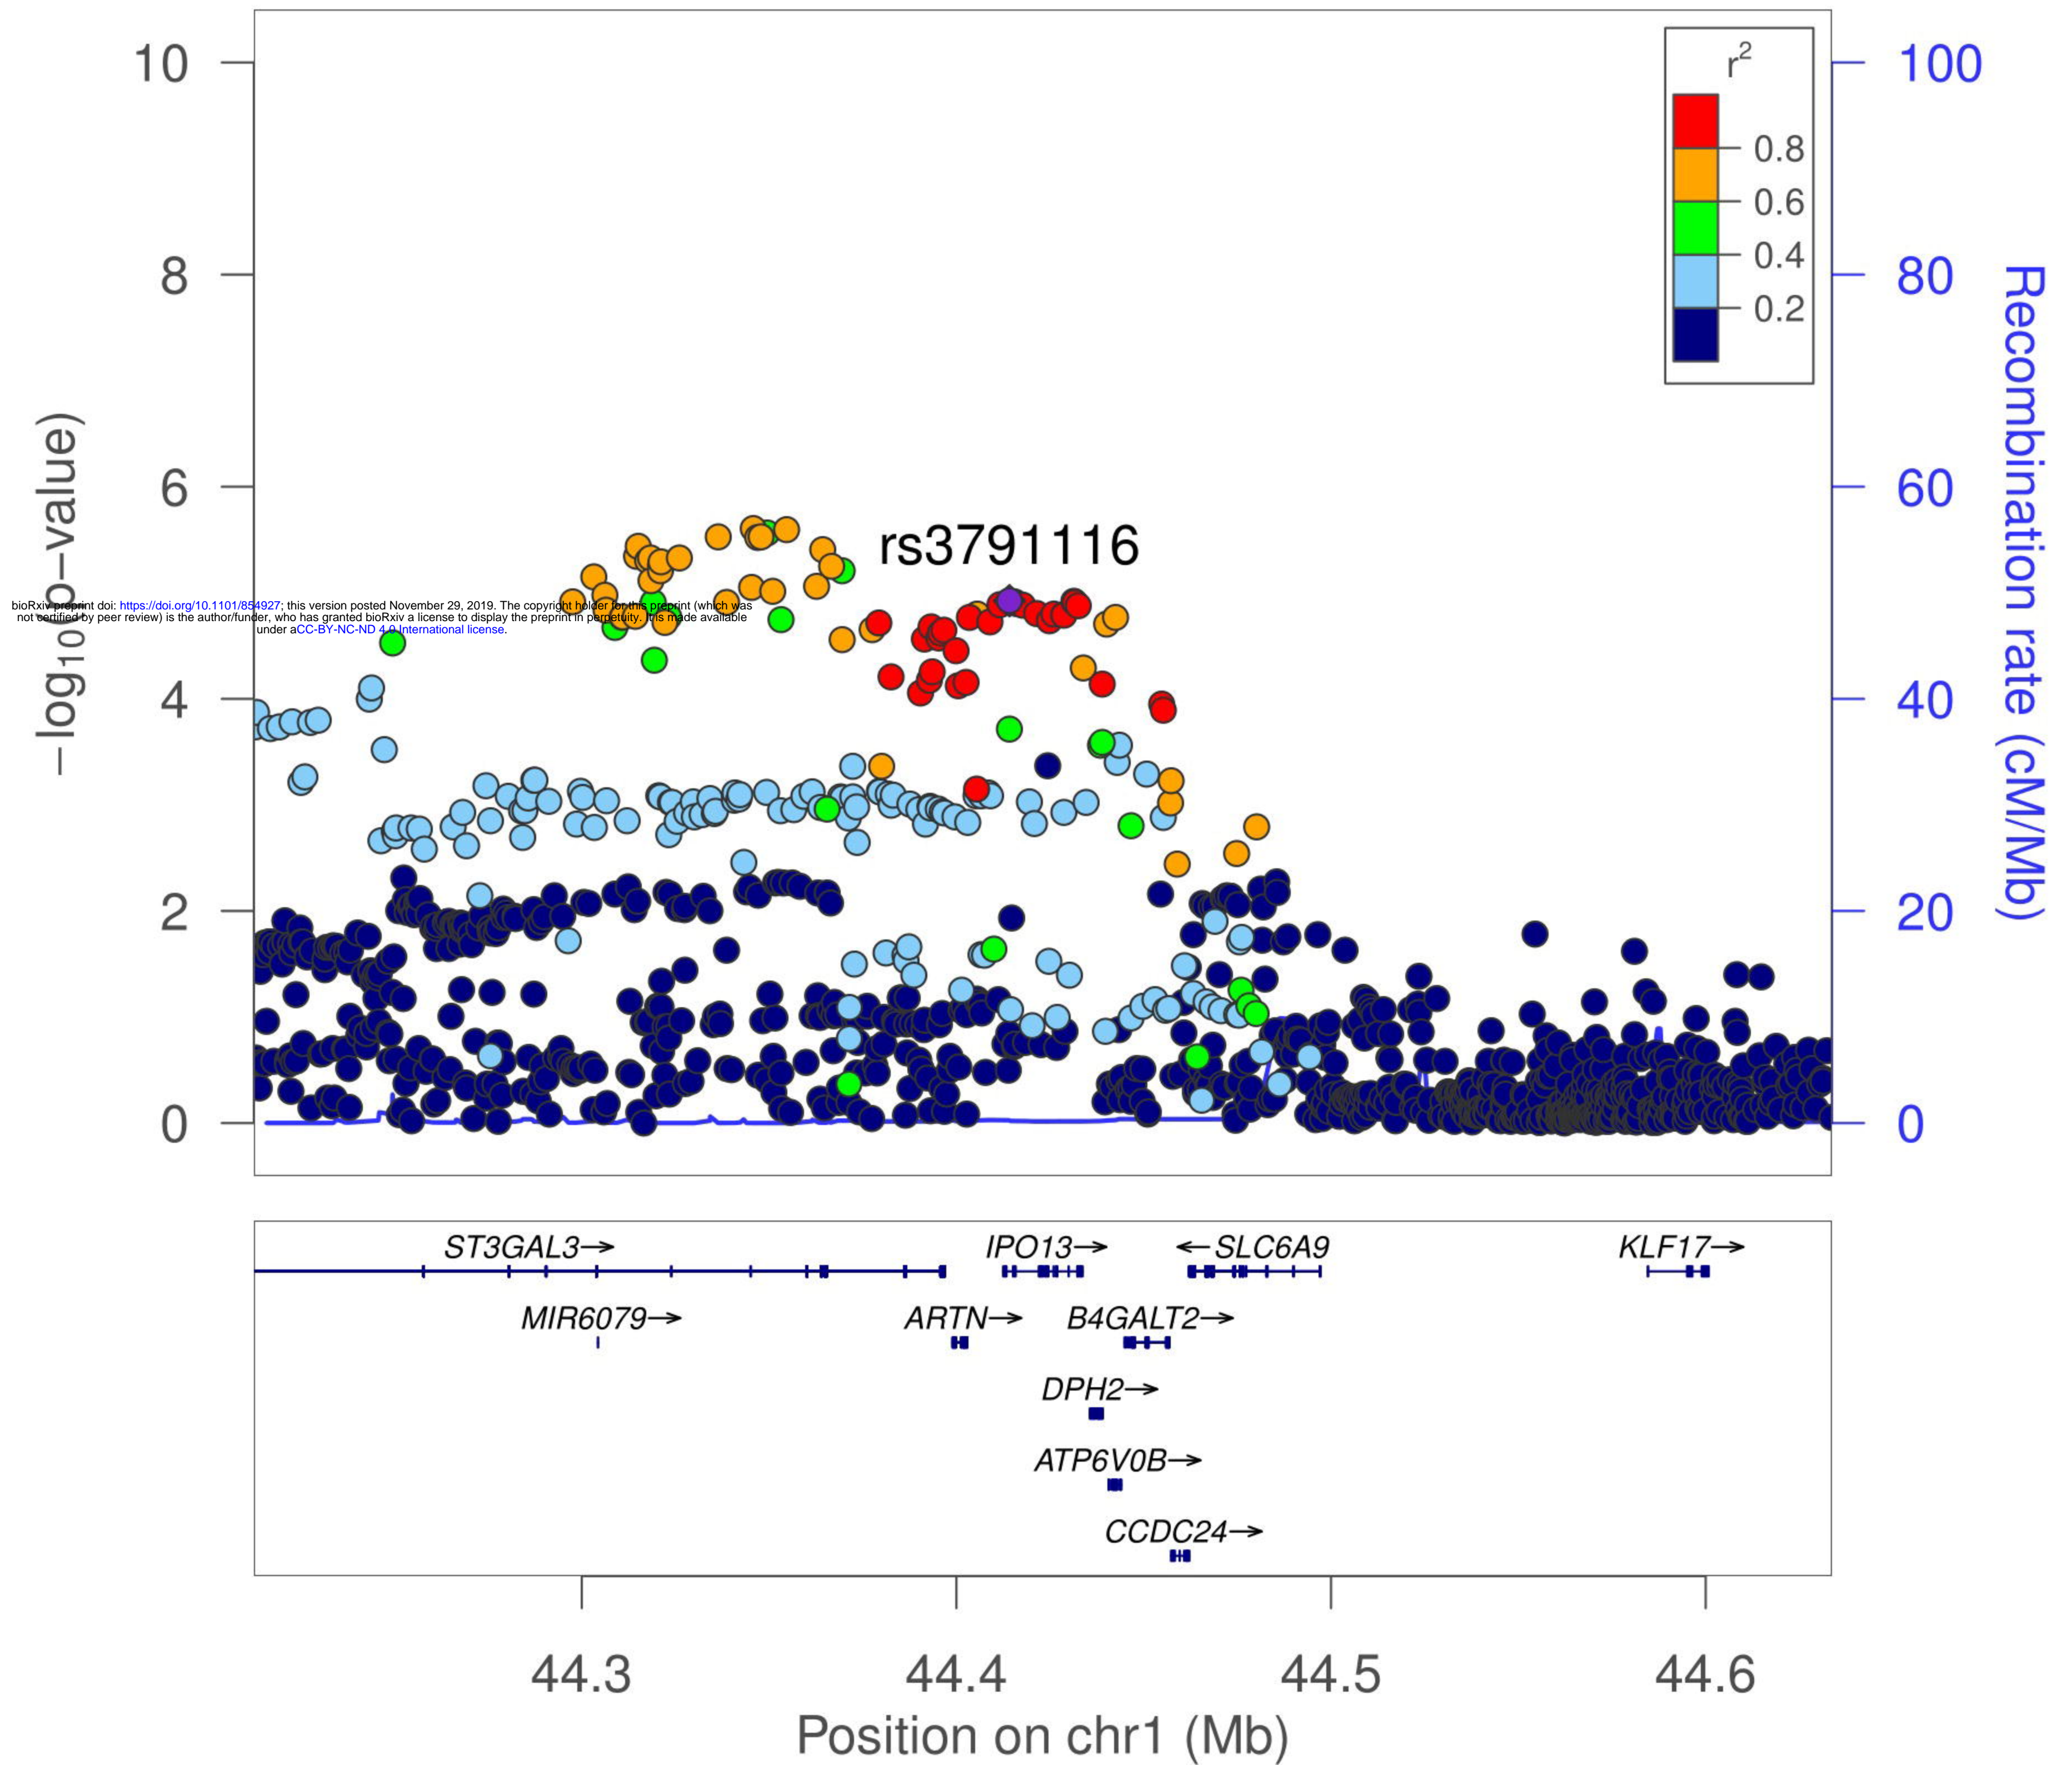

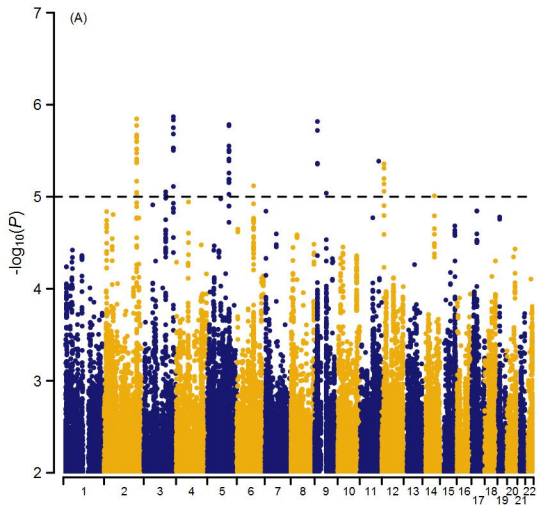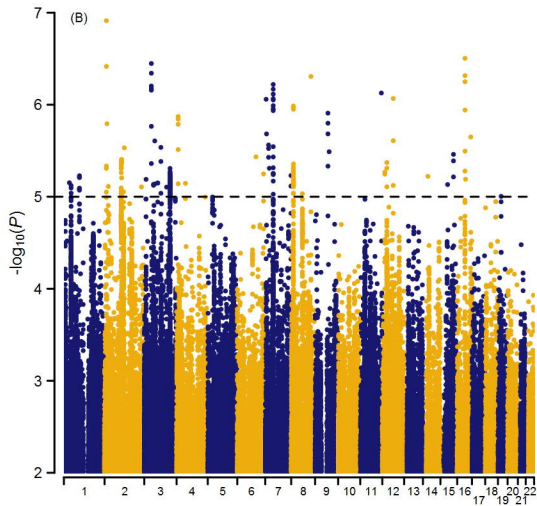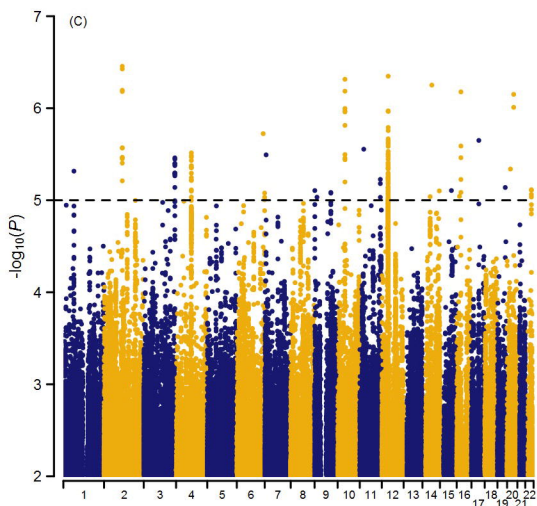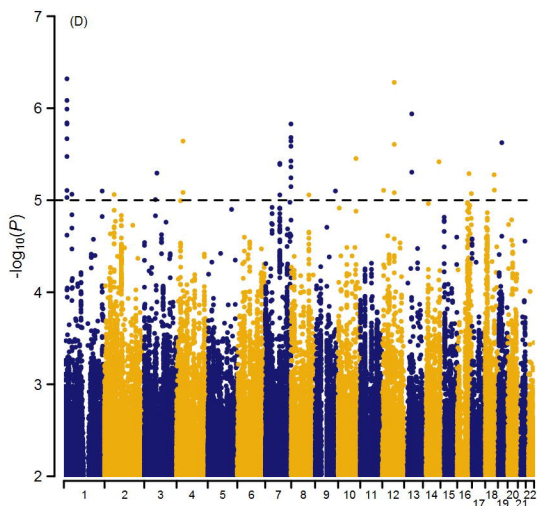



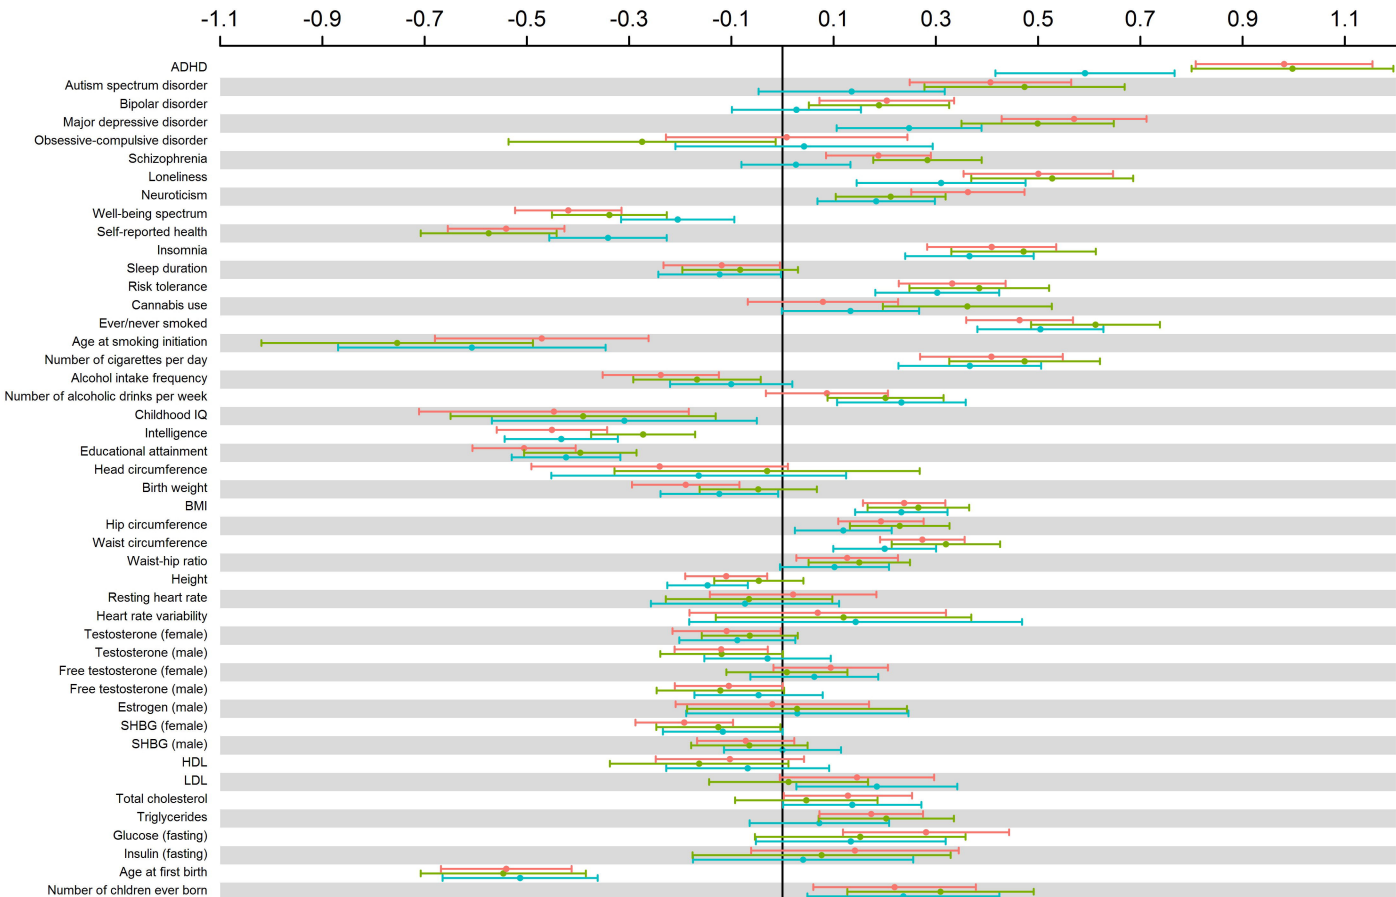

Source: https://www.biorxiv.org/content/10.1101/854927v1.full.pdf
